# Supplementary material for: Rare Acetogenins with Anti-Inflammatory Effect from the Red Alga Laurencia obtusa
Source: MDPI journal article supplement (doi:10.3390/molecules24030476), 2019-01-29
Supplement: s1 [file s1]

# SUPPLEMENTARY MATERIAL

## Rare acetogenins with anti-inflammatory effect from the red alga *Laurencia obtusa*

Walied Mohamed Alarif <sup>1,\*</sup>, Sultan Semran Al-Lihaibi <sup>1</sup>, Nahed Obaid Bawakid <sup>2,\*</sup>, Ahmed Abdel-Lateff <sup>3,4</sup> and Hamdan Salem Al-malky <sup>5</sup>

<sup>1</sup> Department of Marine Chemistry, Faculty of Marine Sciences, King Abdulaziz University, PO. Box 80207, Jeddah 21589, Saudi Arabia; sallihaibi@kau.edu.sa

<sup>2</sup> Department of Chemistry, Faculty of Science, King Abdulaziz University, PO. Box 80203, Jeddah 21589, Saudi Arabia

<sup>3</sup> Department of Natural Products and Alternative Medicine, Faculty of Pharmacy, King Abdulaziz University, PO Box 80260, Jeddah 21589, Saudi Arabia; ahmedabdellateff@gmail.com

<sup>4</sup> Department of Pharmacognosy, Faculty of Pharmacy, Minia University, PO. Box 61511, Minia 61519, Egypt.

<sup>5</sup> Department of Pharmacology, Faculty of Pharmacy, King Abdulaziz University, PO Box 80260, Jeddah 21589, Saudi Arabia; halmalki@kau.edu.sa

\* Correspondence: walied1737@yahoo.com or welaref@kau.edu.sa (W.M.A.); nbawaked@kau.edu.sa (N.O.B.); Tel.: +966-56-0352-034 (W.M.A.); Tel +966-50-4690-309 (N.O.B.)

### Abstract

Three new rare C12 acetogenins en-yne derivatives (**1-3**) were isolated from the organic extract obtained from the red alga *Laurencia obtusa*, collected from the Red Sea. The chemical structures of the isolated compounds were established by spectroscopical data analyses. Potent anti-inflammatory effect of the isolated metabolites was evidenced by inhibition of releasing the inflammatory mediators (e.g. TNF- $\alpha$ , IL-1 $\beta$  and IL-6) by employing Human Peripheral Blood Mononuclear Cells (PBMC).

**Keywords:** Anti-inflammatory; *Laurencia obtusa*; Acetogenins; Spectroscopy; Red Sea

Dr. Walied

Sample : NL-235-1 CDCL3

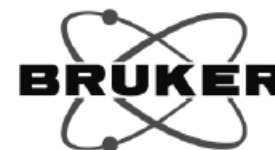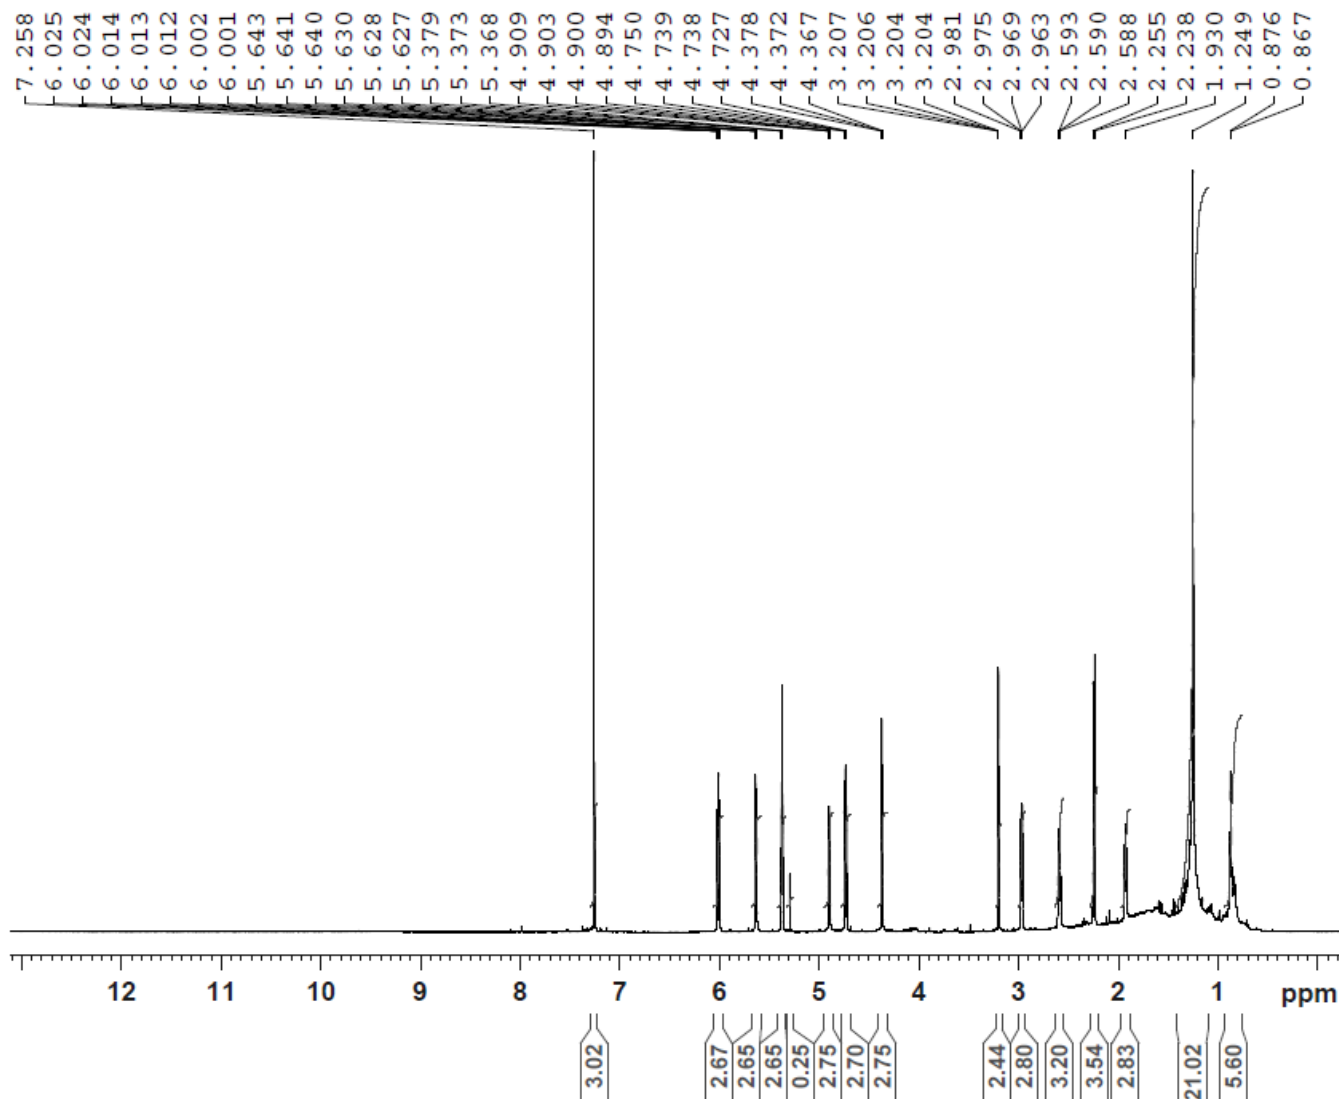

Current Data Parameters  
NAME WALIED NL-235-1 21-02-2017  
EXPNO 70  
PROCNO 1

F2 - Acquisition Parameters  
Date\_ 20170221  
Time\_ 10.42  
INSTRUM spect  
PROBHD 5 mm CPQCI 1H-  
PULPROG zg30  
TD 65536  
SOLVENT CDCL3  
NS 32  
DS 2  
SWH 17006.803 Hz  
FIDRES 0.259503 Hz  
AQ 1.9267584 sec  
RG 9.04  
DW 29.400 usec  
DE 10.00 usec  
TE 298.0 K  
D1 1.00000000 sec  
TD0 1

----- CHANNEL f1 -----  
SFO1 850.1552500 MHz  
NUC1 1H  
P1 8.00 usec  
PLW1 15.30000019 W

F2 - Processing parameters  
SI 65536  
SF 850.1500200 MHz  
WDW EM  
SSB 0  
LB 0.30 Hz  
GB 0  
PC 2.00

Figure S1a: <sup>1</sup>H NMR of compound 1

Dr. Walied  
Sample : NL-235-1 CDCL<sub>3</sub>

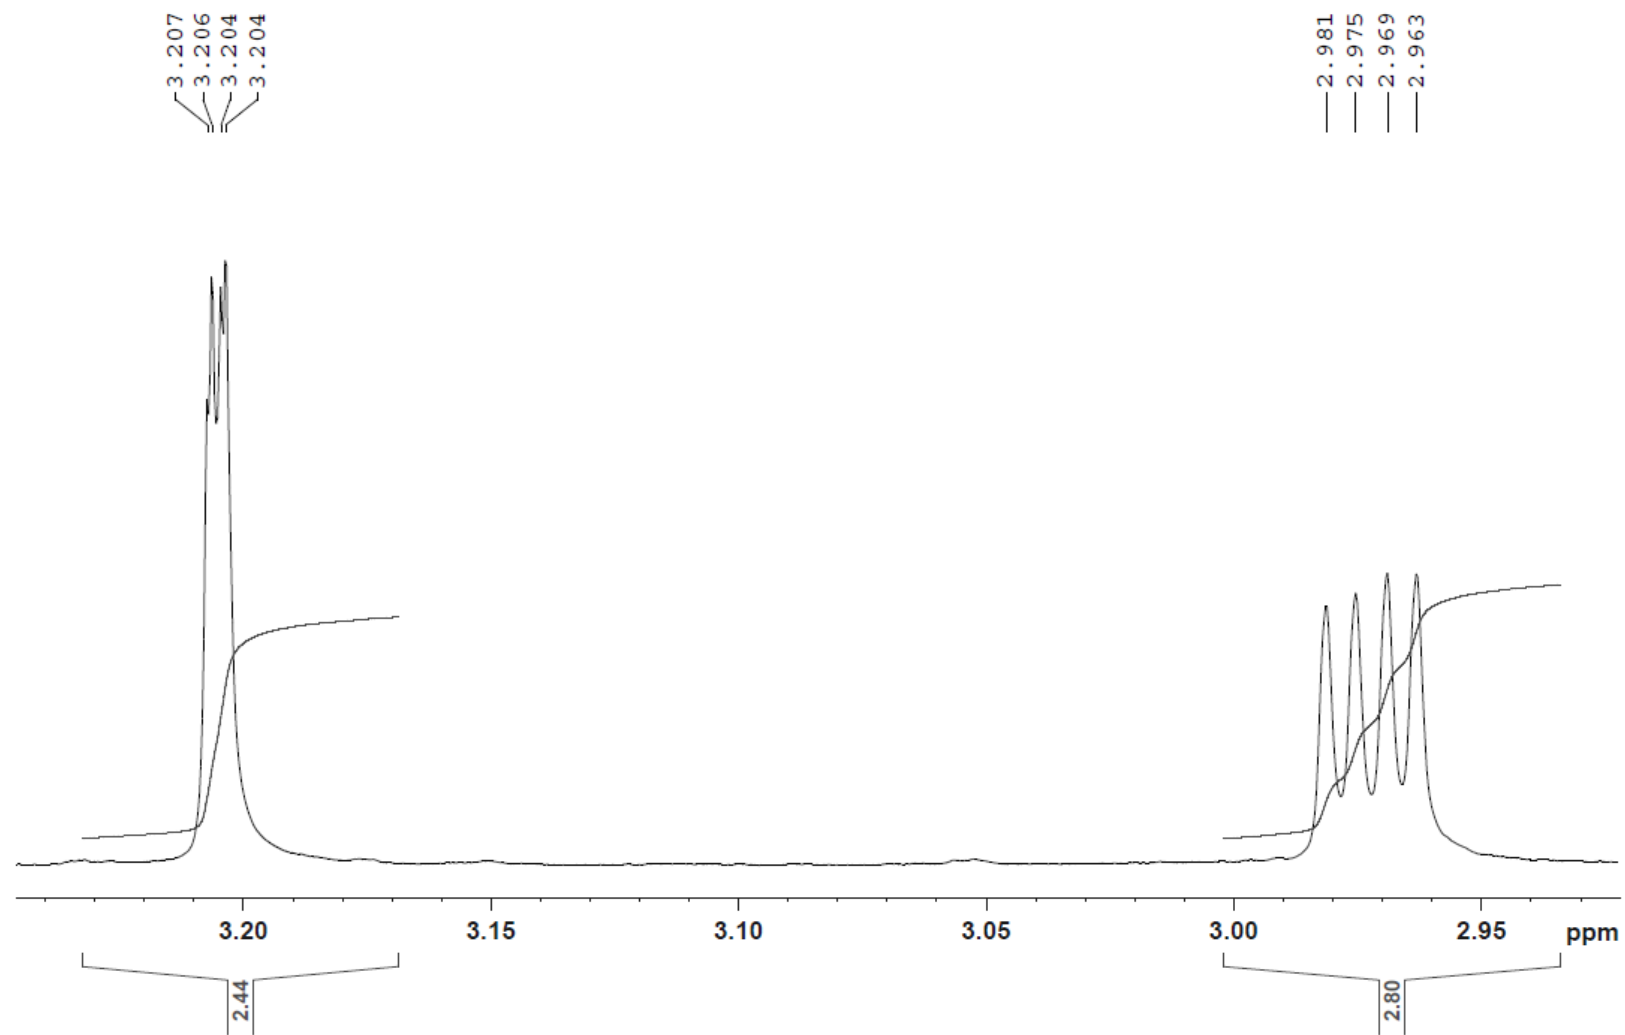

Figure S1b: <sup>1</sup>H NMR of compound 1

Dr. Walied

Sample : NL-235-1 CDCL<sub>3</sub>

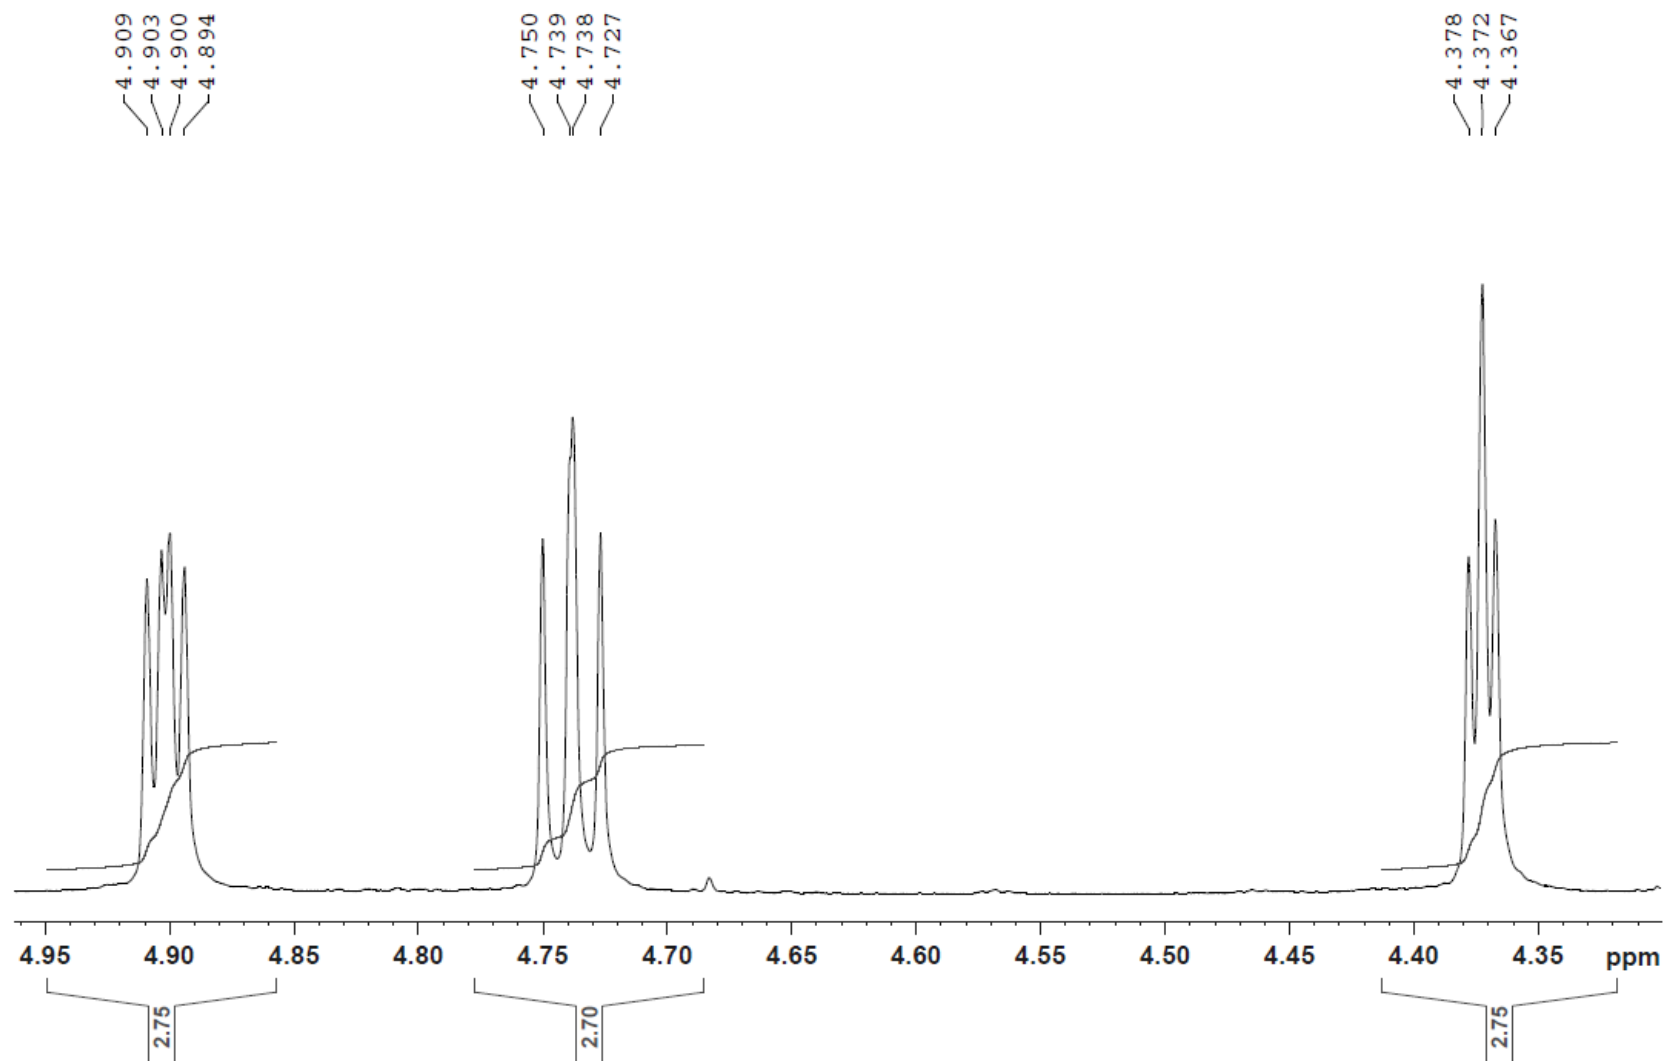

Figure S1c: <sup>1</sup>H NMR of compound 1

Dr. Walled  
Sample : NL-235-1 CDCL3

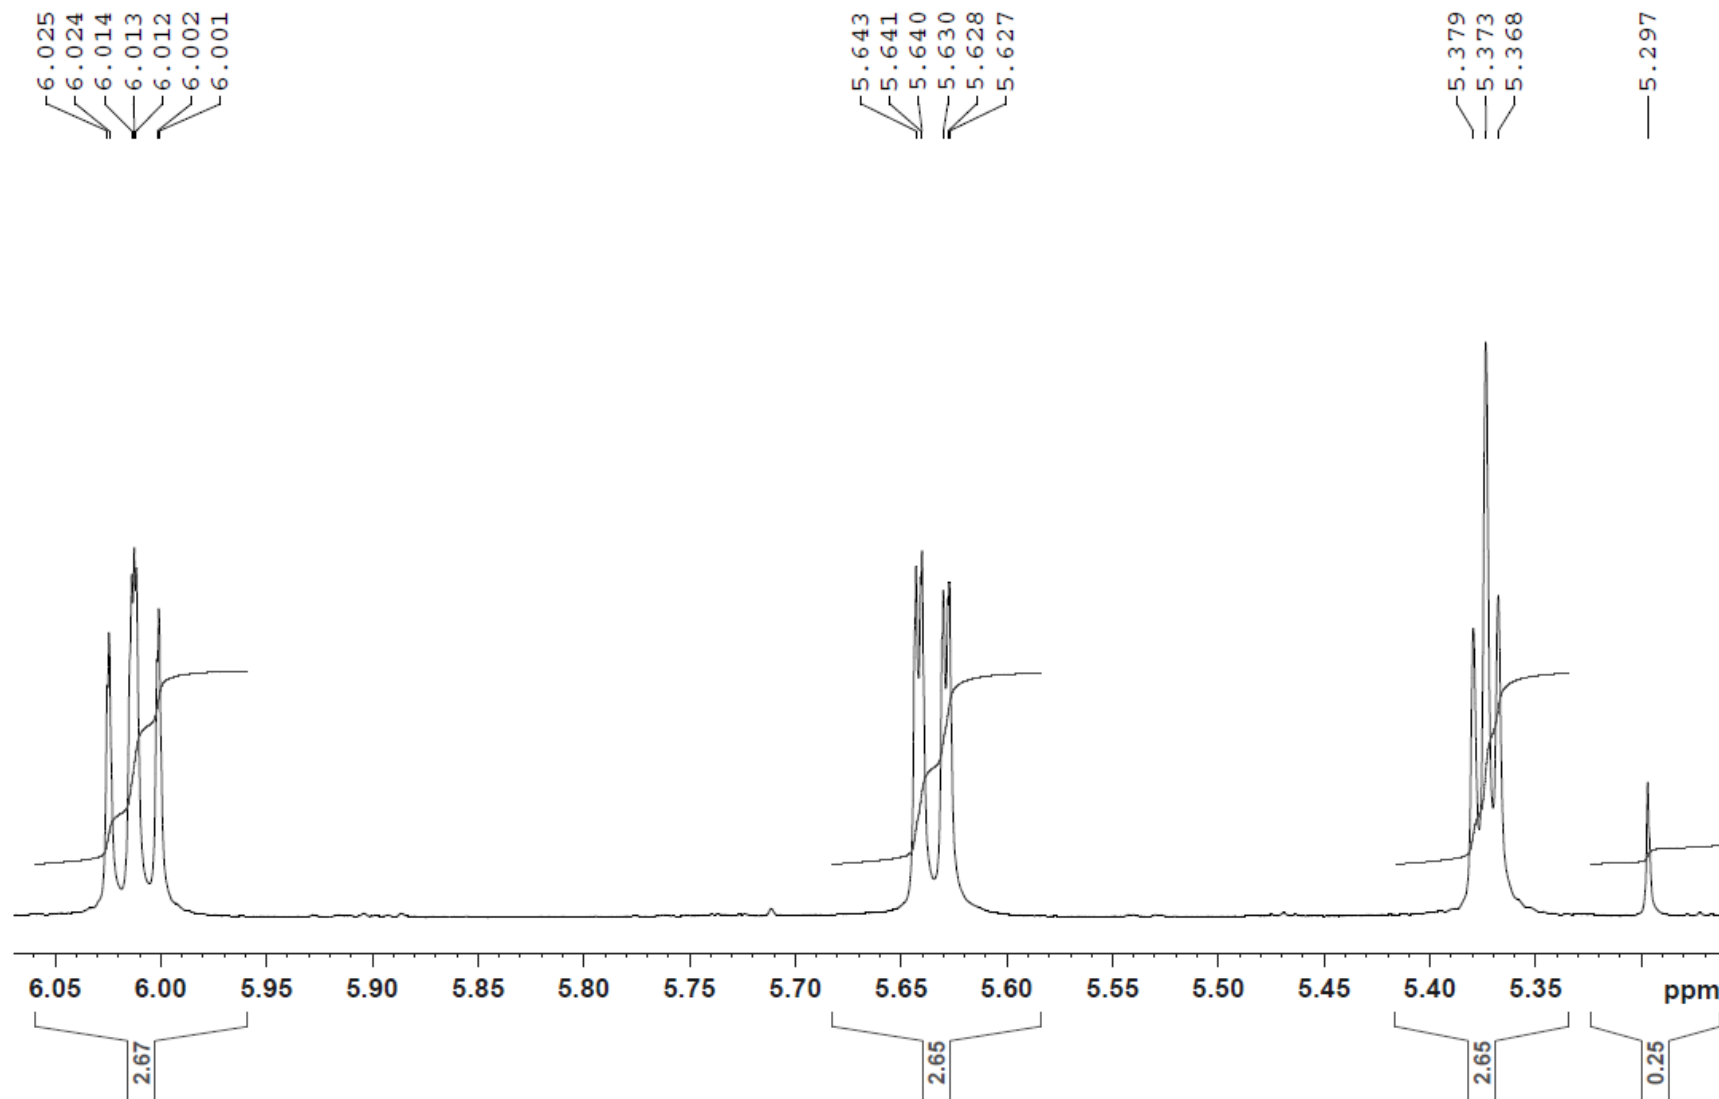

Figure S1d:  $^1\text{H}$ NMR of compound 1

Dr. Walied

Sample : NL-235-1

CDCL<sub>3</sub>

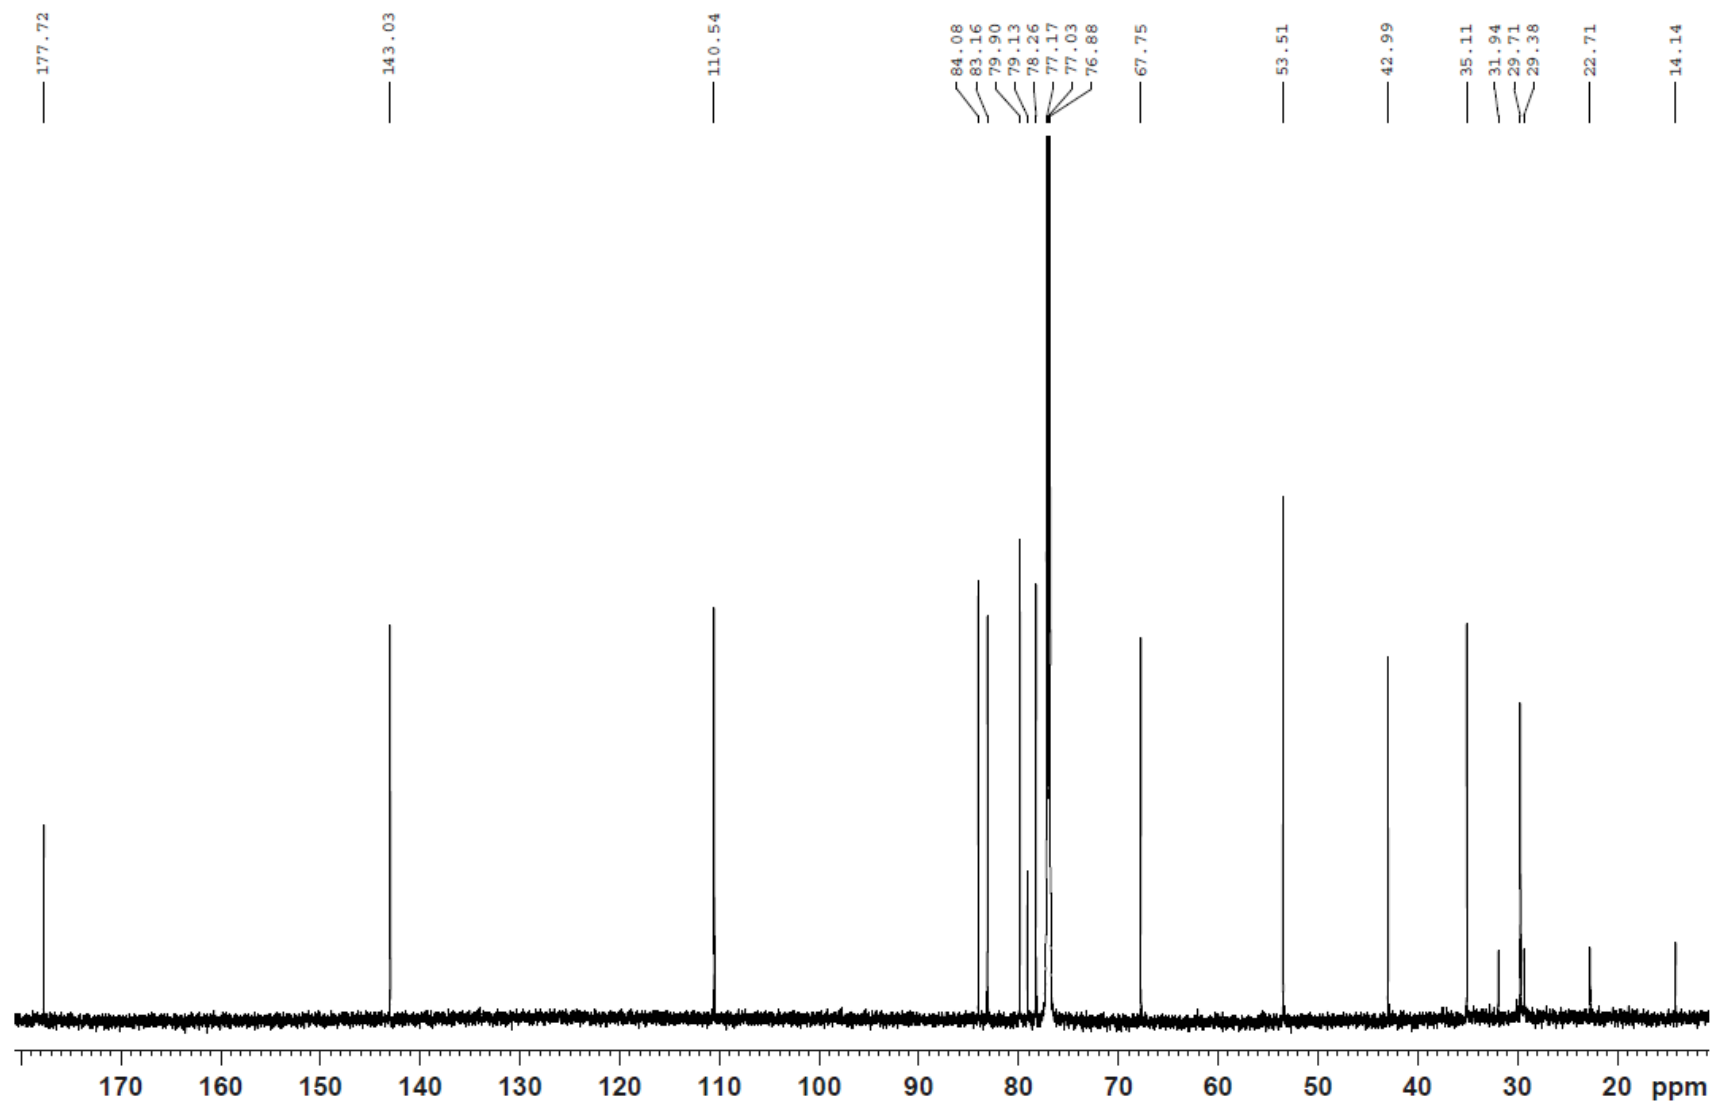

Figure S1e: <sup>13</sup>CNMR of compound 1



Dr. Walied

Sample : NL-235-1

CDCL<sub>3</sub>

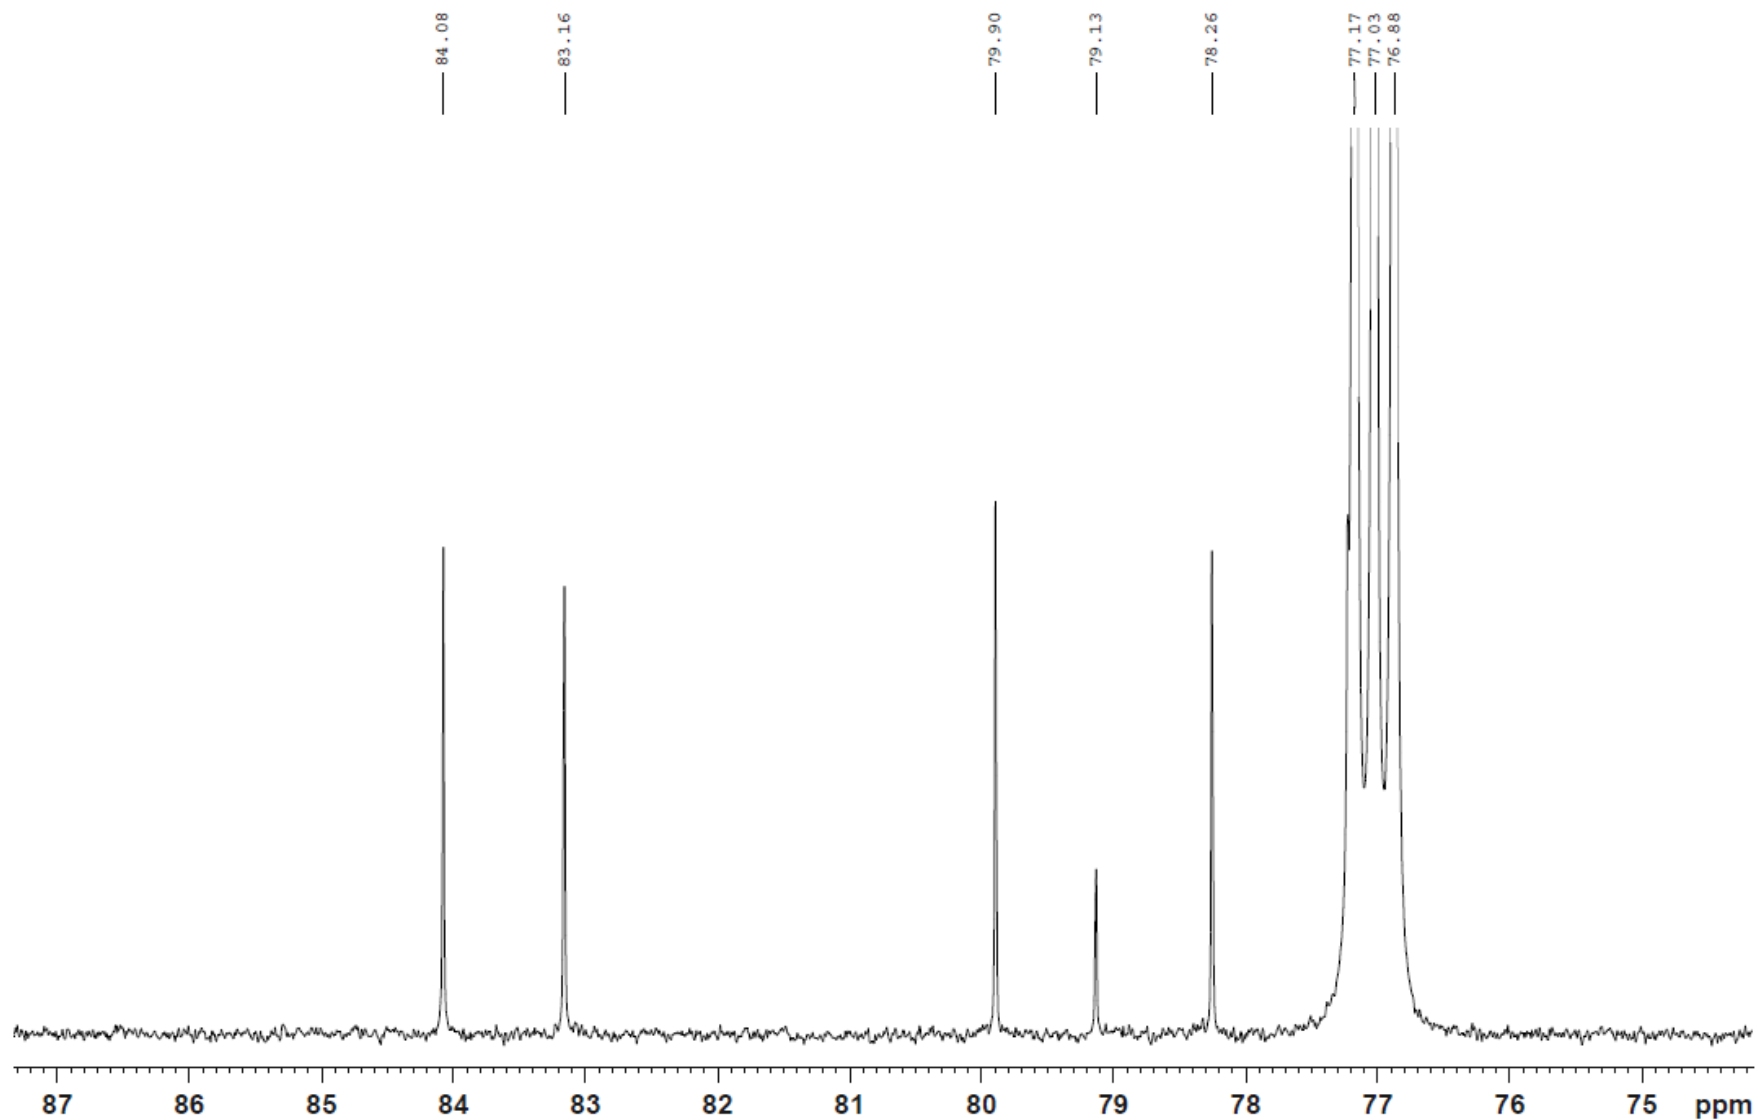

Figure S1f: <sup>13</sup>CNMR of compound 1



Dr. Walied  
Sample : NL-235-1 CDCL3

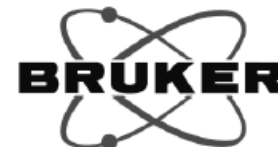

Current Data Parameters  
NAME WALIED NL-2351 23-02-2017  
EXPNO 15  
PROCNO 1

F2 - Acquisition Parameters  
Date 20170223  
Time 23.22  
INSTRUM spect  
PROBHD 5 mm CPQCI 1H-  
PULPROG hsqcaddgpp  
TD 1024  
SOLVENT CDCL3  
NS 32  
DS 16  
SWH 7812.500 Hz  
FIDRES 7.629395 Hz  
AQ 0.0655360 sec  
RG 186.93  
DW 64.000 usec  
DE 10.00 usec  
TE 298.0 K  
CNST2 145.0000000  
D0 0.0000380 sec  
D1 1.48088503 sec  
D4 0.00172414 sec  
D11 0.03000000 sec  
D13 0.00000480 sec  
D16 0.00020000 sec  
D21 0.00345000 sec  
INO 0.00001410 sec  
ZDOPUS

----- CHANNEL f1 -----  
SFO1 850.1530380 MHz  
NUC1 1H  
P1 8.00 usec  
P2 16.00 usec  
P28 0 usec  
PLM1 15.30000019 W

----- CHANNEL f2 -----  
SFO2 213.7863316 MHz  
NUC2 13C  
CPDPRG[2] garp  
P3 12.00 usec  
P4 24.00 usec  
PCPD2 45.00 usec  
PLM2 130.00000000 W  
PLM12 9.24440002 W

----- GRADIENT CHANNEL -----  
GPMAM[1] SMSQ10.100  
GPMAM[2] SMSQ10.100  
GPZ1 80.00 %  
GPZ2 20.10 %  
P16 1000.00 usec

F1 - Acquisition parameters  
TD 256  
SFO1 213.7863 MHz  
FIDRES 138.919501 Hz  
SW 165.871 ppm  
PnMODE Echo-Antiecho

F2 - Processing parameters  
SI 1024  
SF 850.1500200 MHz  
WDW QSINE  
SSB 2  
LB 0 Hz  
GB 0  
PC 1.40

F1 - Processing parameters  
SI 1024  
WC2 echo-antiecho  
SF 213.7703875 MHz  
WDW QSINE  
SSB 2  
LB 0 Hz  
GB 0

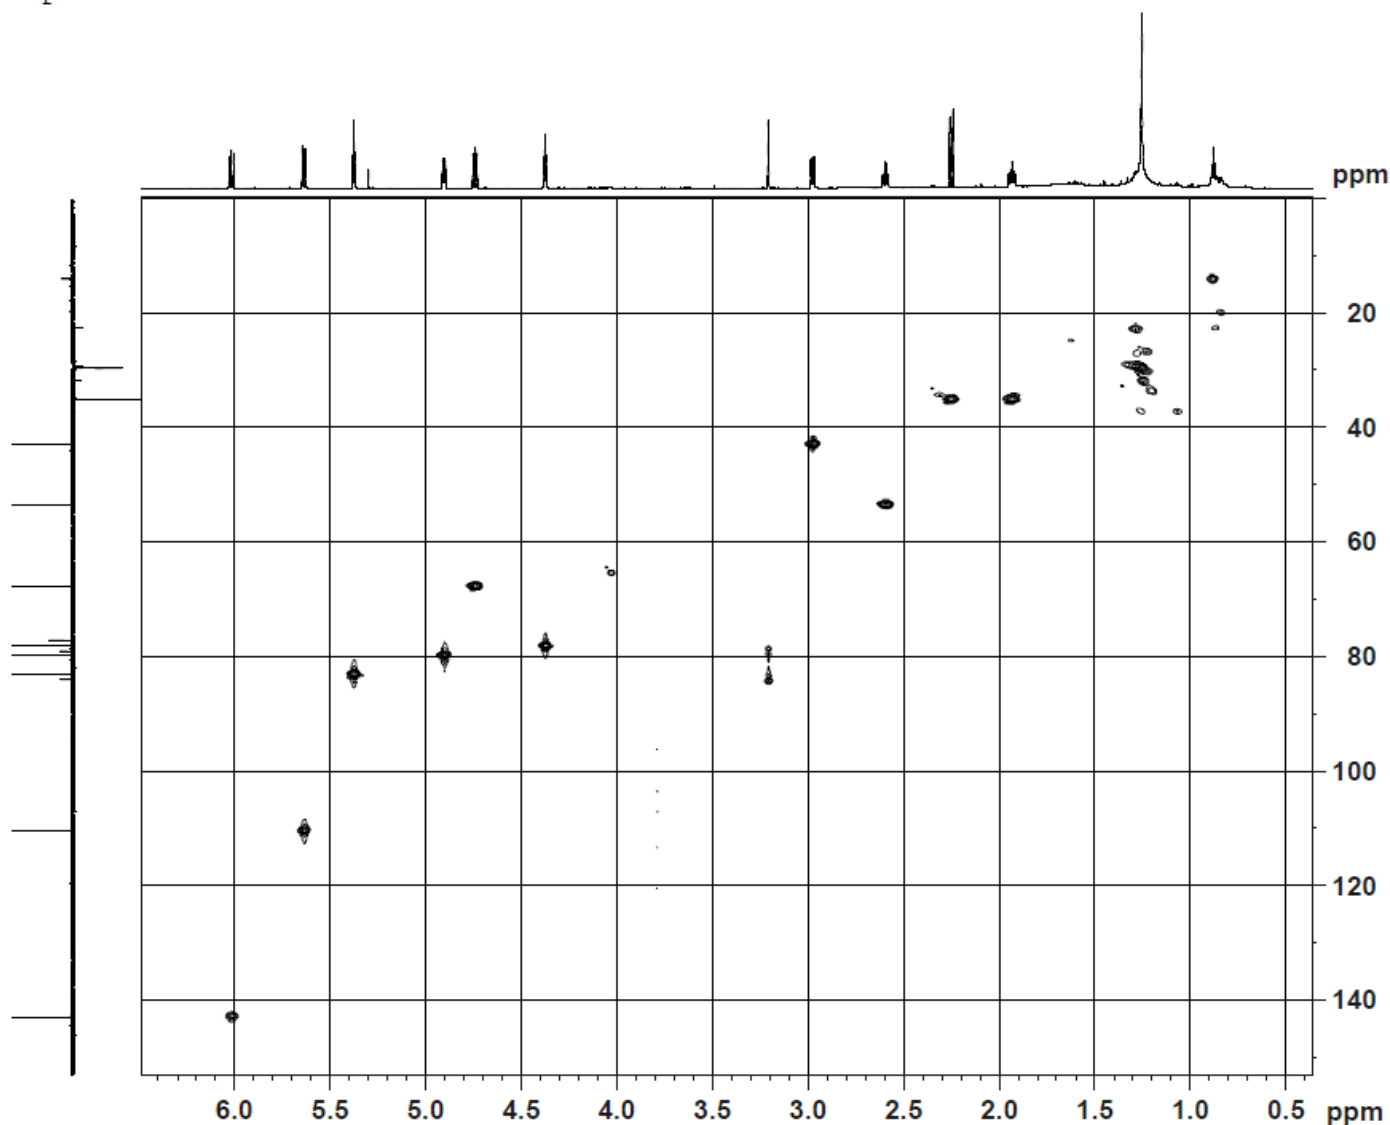

Figure S1g: HSQC NMR of compound 1

Dr. Walied  
Sample : NL-235-1 CDCL3

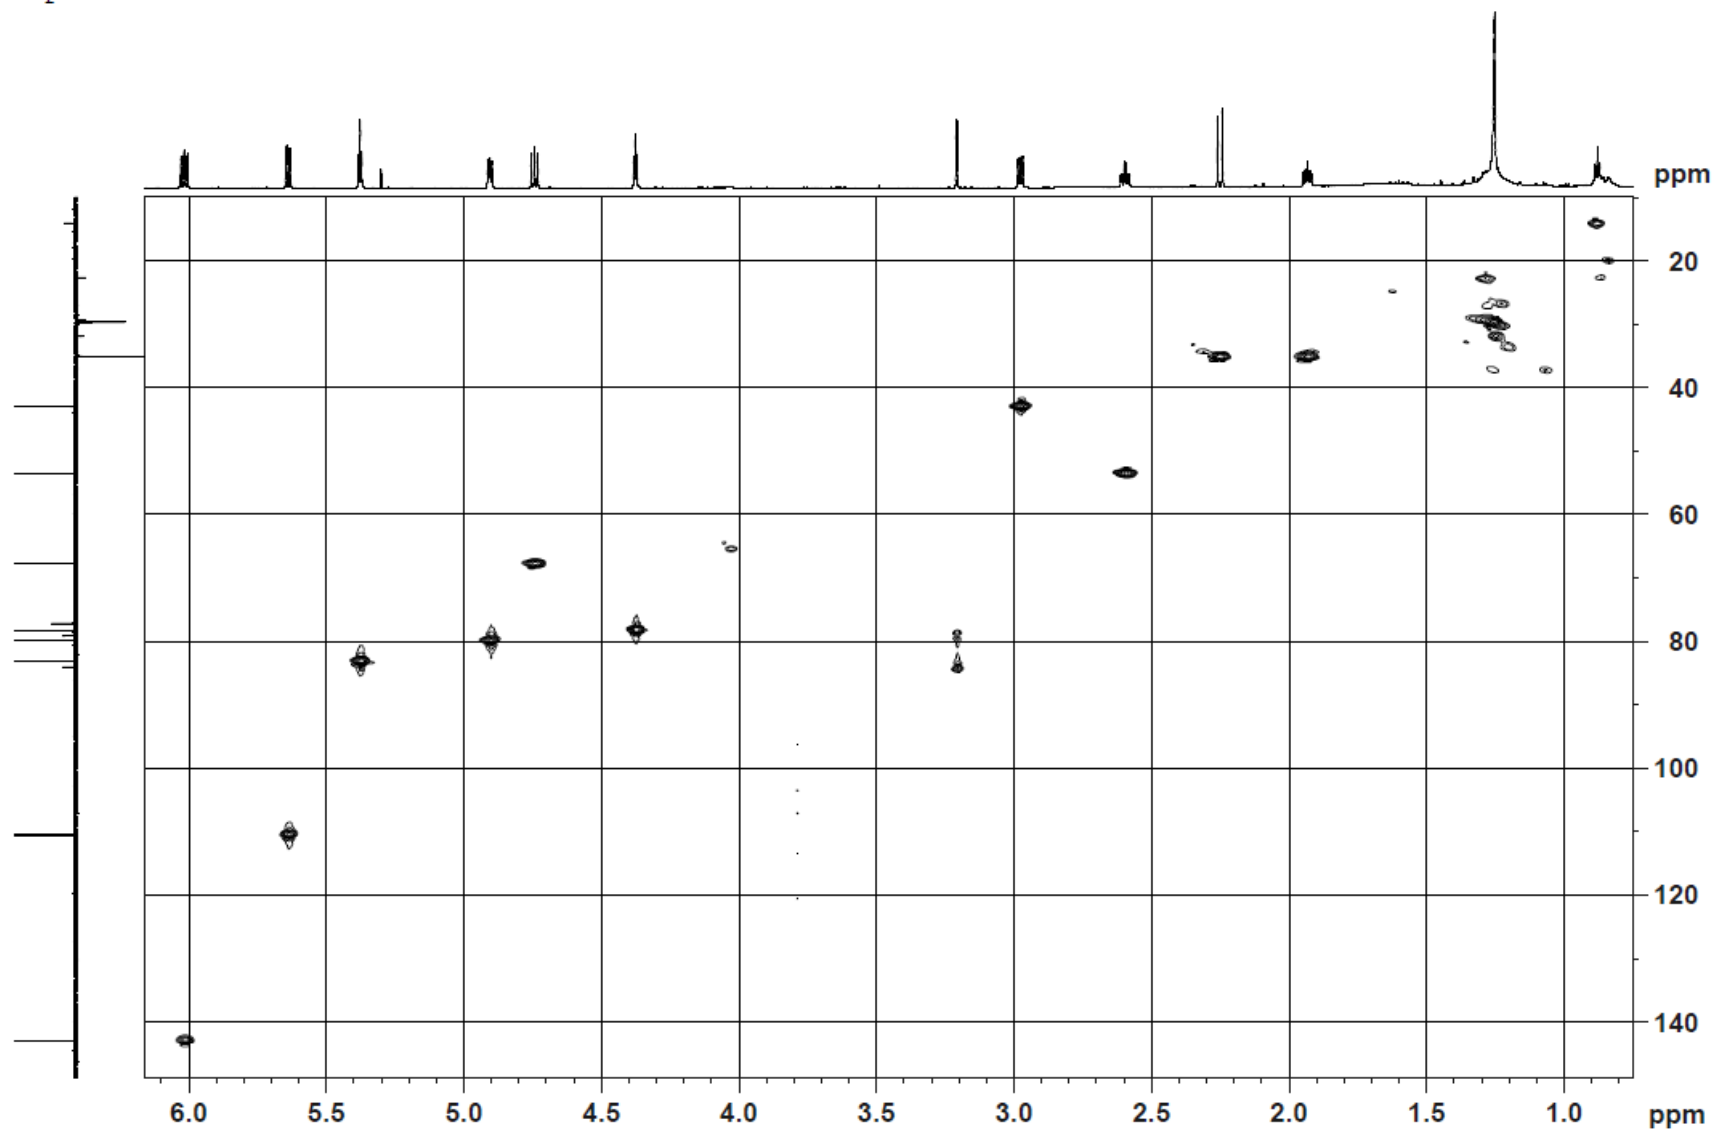

Figure S1h: HSQC NMR of compound 1

Dr. Walied  
Sample : NL-235-1 CDCL3

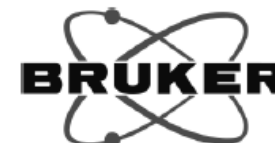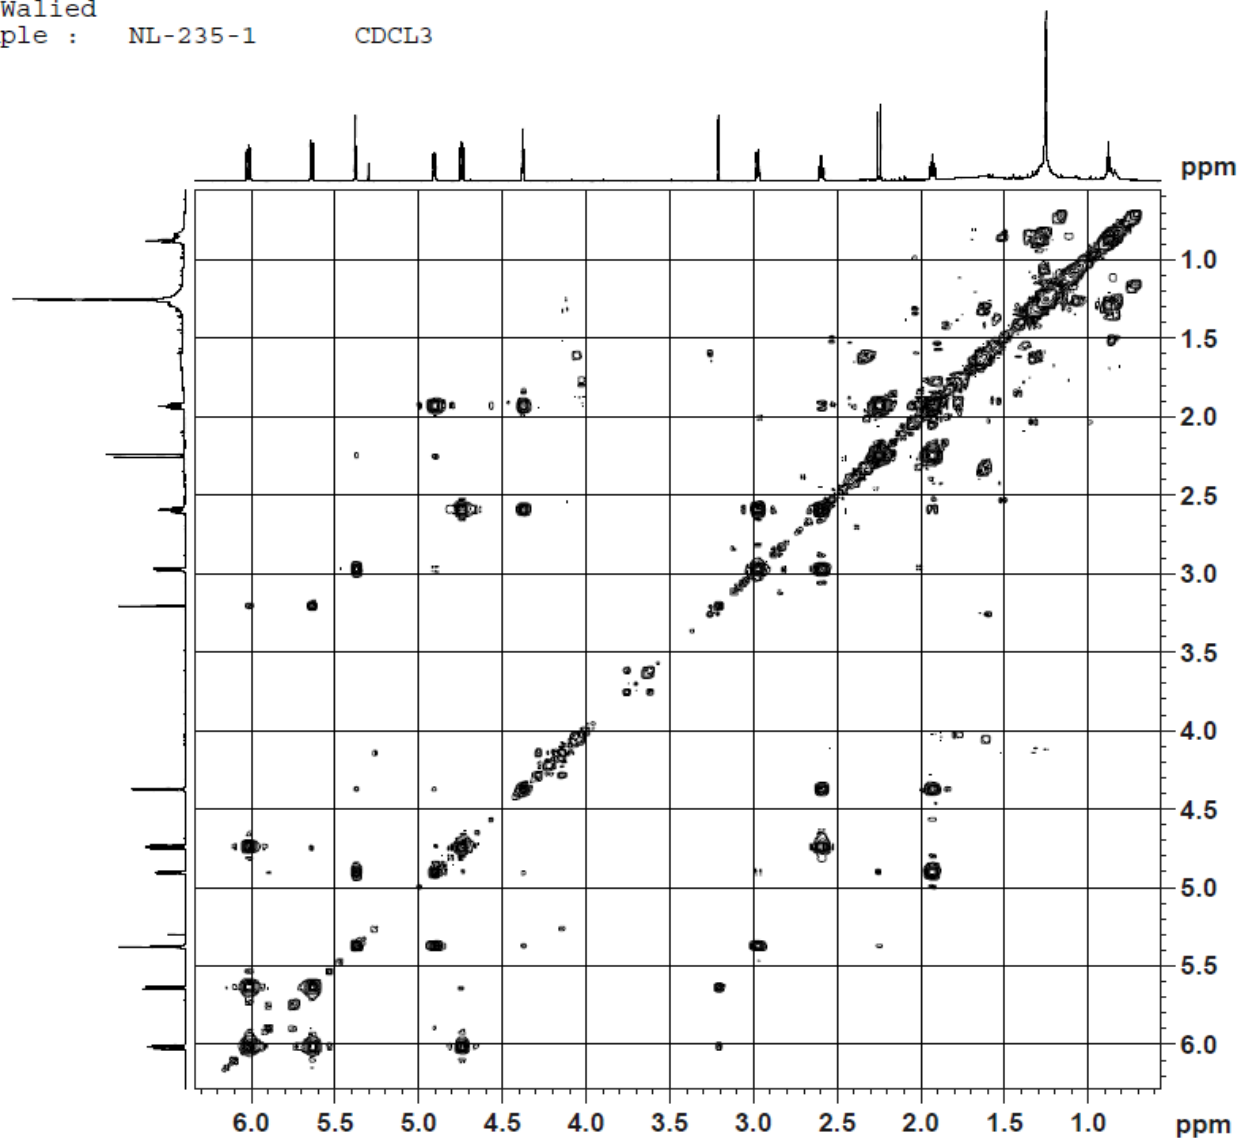

Current Data Parameters  
NAME WALIED NL-2351 23-02-2017  
EXPNO 13  
PROCNO 1

F2 - Acquisition Parameters  
Date\_ 20170223  
Time 16.28  
INSTRUM spect  
PROBHD 5 mm CPQCI 1H-  
PULPROG cosygpmfzf  
TD 2048  
SOLVENT CDCL3  
NS 16  
DS 8  
SWH 7812.500 Hz  
FIDRES 3.814697 Hz  
AQ 0.1310720 sec  
RG 186.93  
DW 64.000 usec  
DE 10.00 usec  
TE 298.0 K  
DO 0.00000300 sec  
D1 1.95904005 sec  
D13 0.00000400 sec  
D16 0.00020000 sec  
IN0 0.00012800 sec

----- CHANNEL f1 -----  
SFO1 850.1530380 MHz  
NUC1 1H  
P1 8.00 usec  
PLW1 15.30000019 W

----- GRADIENT CHANNEL -----  
GPNAM[1] SMSQ10.100  
GPNAM[2] SMSQ10.100  
GPNAM[3] SMSQ10.100  
GPZ1 16.00 %  
GPZ2 12.00 %  
GPZ3 40.00 %  
P16 1000.00 usec

F1 - Acquisition parameters  
TD 128  
SFO1 850.153 MHz  
FIDRES 61.035156 Hz  
SW 9.190 ppm  
PnMODE QF

F2 - Processing parameters  
SI 1024  
SF 850.1500200 MHz  
WDW SINE  
SSB 0  
LB 0 Hz  
GB 0  
PC 1.40

F1 - Processing parameters  
SI 1024  
MC2 QF  
SF 850.1500200 MHz  
WDW SINE  
SSB 0  
LB 0 Hz  
GB 0

Figure S1i: COSY NMR of compound 1

Dr. Walied

Sample : NL-235-1

CDCL<sub>3</sub>

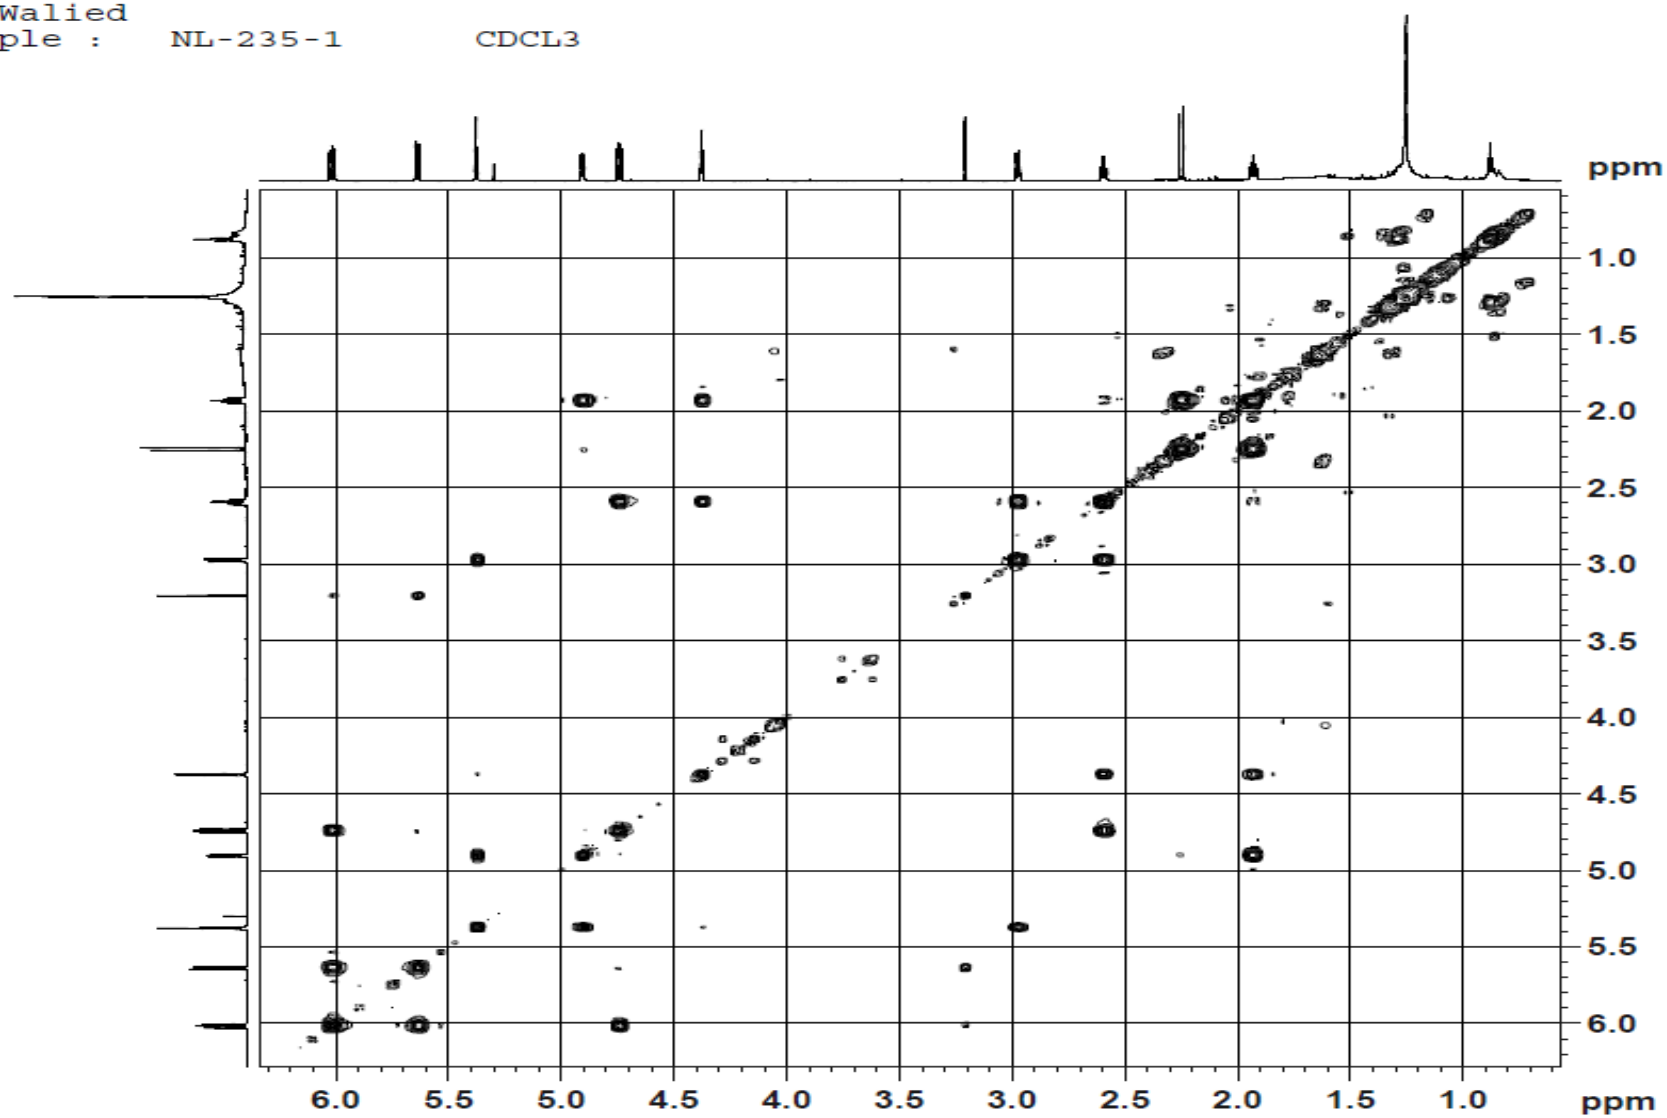

Figure S1j: COSY NMR of compound 1

Dr.Walied

Sample : NL-235-1 CDCL3

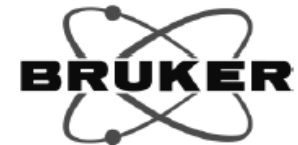

Current Data Parameters  
NAME WALIED NL-2351 23-02-2017  
EXPTNO 16  
PROCNO 1

F2 - Acquisition Parameters  
Date\_ 20170224  
Time 2.59  
INSTRUM spect  
PROBHD 5 mm CDQCI 1H-  
PULPROG hmbcgpndqf  
TD 4096  
SOLVENT CDCL3  
NS 64  
DS 16  
SWH 7812.500 Hz  
FIDRES 1.907349 Hz  
AQ 0.2621440 sec  
RG 186.93  
DW 64.000 usec  
DE 10.00 usec  
TE 298.0 K  
CNST13 8.0000000  
D0 0.00000300 sec  
D1 1.41889906 sec  
D6 0.06250000 sec  
D16 0.00020000 sec  
IN0 0.00001050 sec

----- CHANNEL f1 -----  
SFO1 850.1530380 MHz  
NUC1 1H  
P1 8.00 usec  
P2 16.00 usec  
PLW1 15.30000019 W  
----- CHANNEL f2 -----  
SFO2 213.7917305 MHz  
NUC2 13C  
P3 12.00 usec  
PLW2 130.00000000 W

----- GRADIENT CHANNEL -----  
GPNAM[1] SMO10.100  
GPNAM[2] SMO10.100  
GPNAM[3] SMO10.100  
GPE1 50.00 %  
GPE2 30.00 %  
GPE3 40.10 %  
P16 1000.00 usec

F1 - Acquisition parameters  
TD 128  
SFO1 213.7917 MHz  
FIDRES 372.023804 Hz  
SW 222.736 ppm  
F2MODE QF

F2 - Processing parameters  
SI 1024  
SF 850.1500200 MHz  
WDW SINK  
SSB 0  
LB 0 Hz  
GB 0  
PC 1.40

F1 - Processing parameters  
SI 1024  
MC2 QF  
SF 213.7703875 MHz  
WDW SINK  
SSB 0  
LB 0 Hz  
GB 0

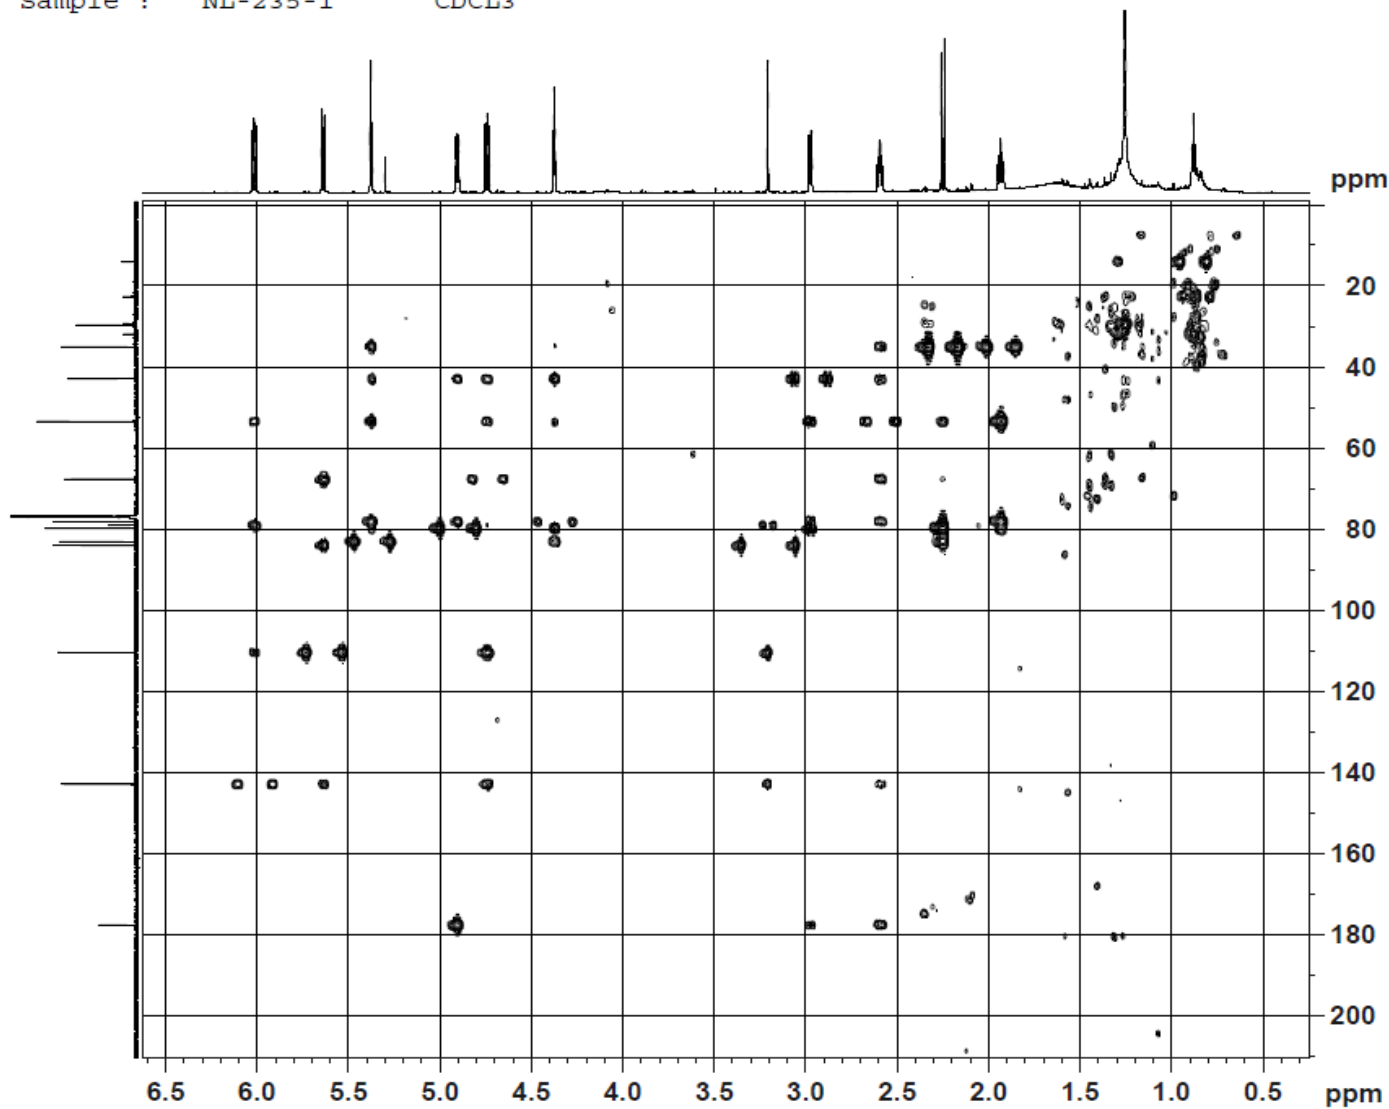

Figure S1k: HMBC NMR of compound 1

Dr. Walied

Sample : NL-235-1

CDCL<sub>3</sub>

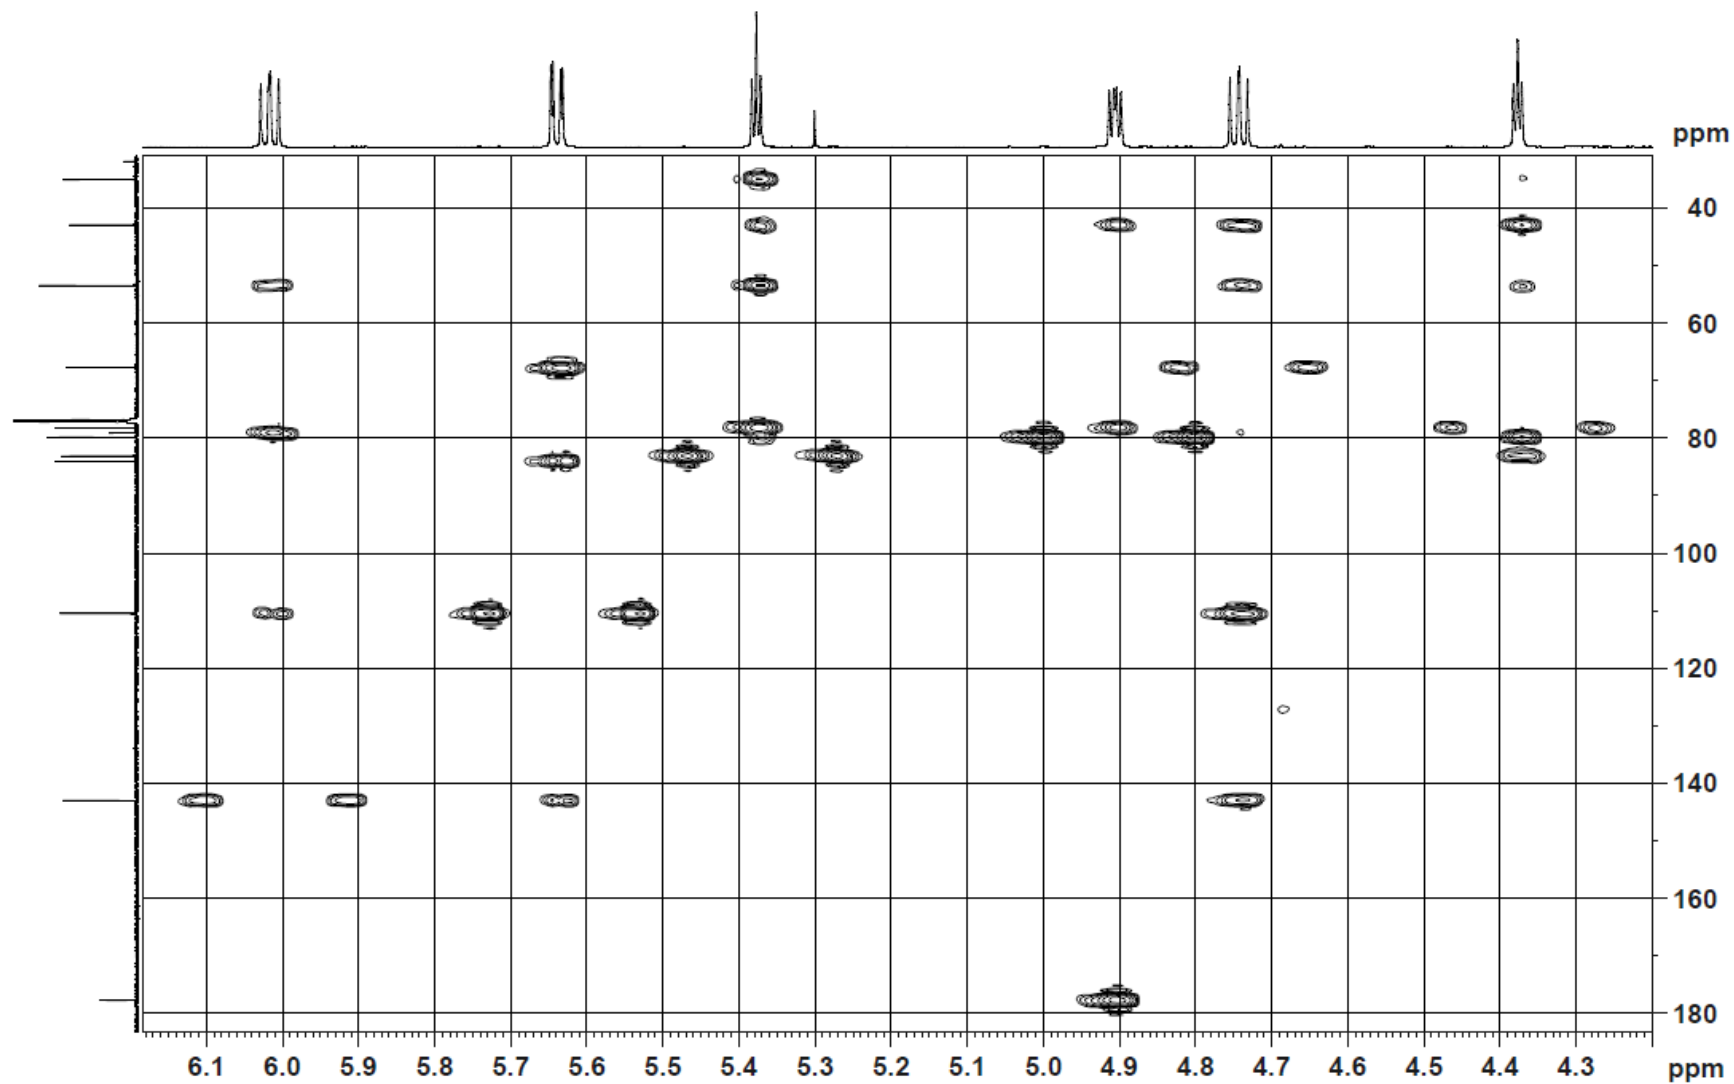

Figure S11: HMBC NMR of compound 1

Dr. Walied

Sample : NL-235-1

CDCL<sub>3</sub>

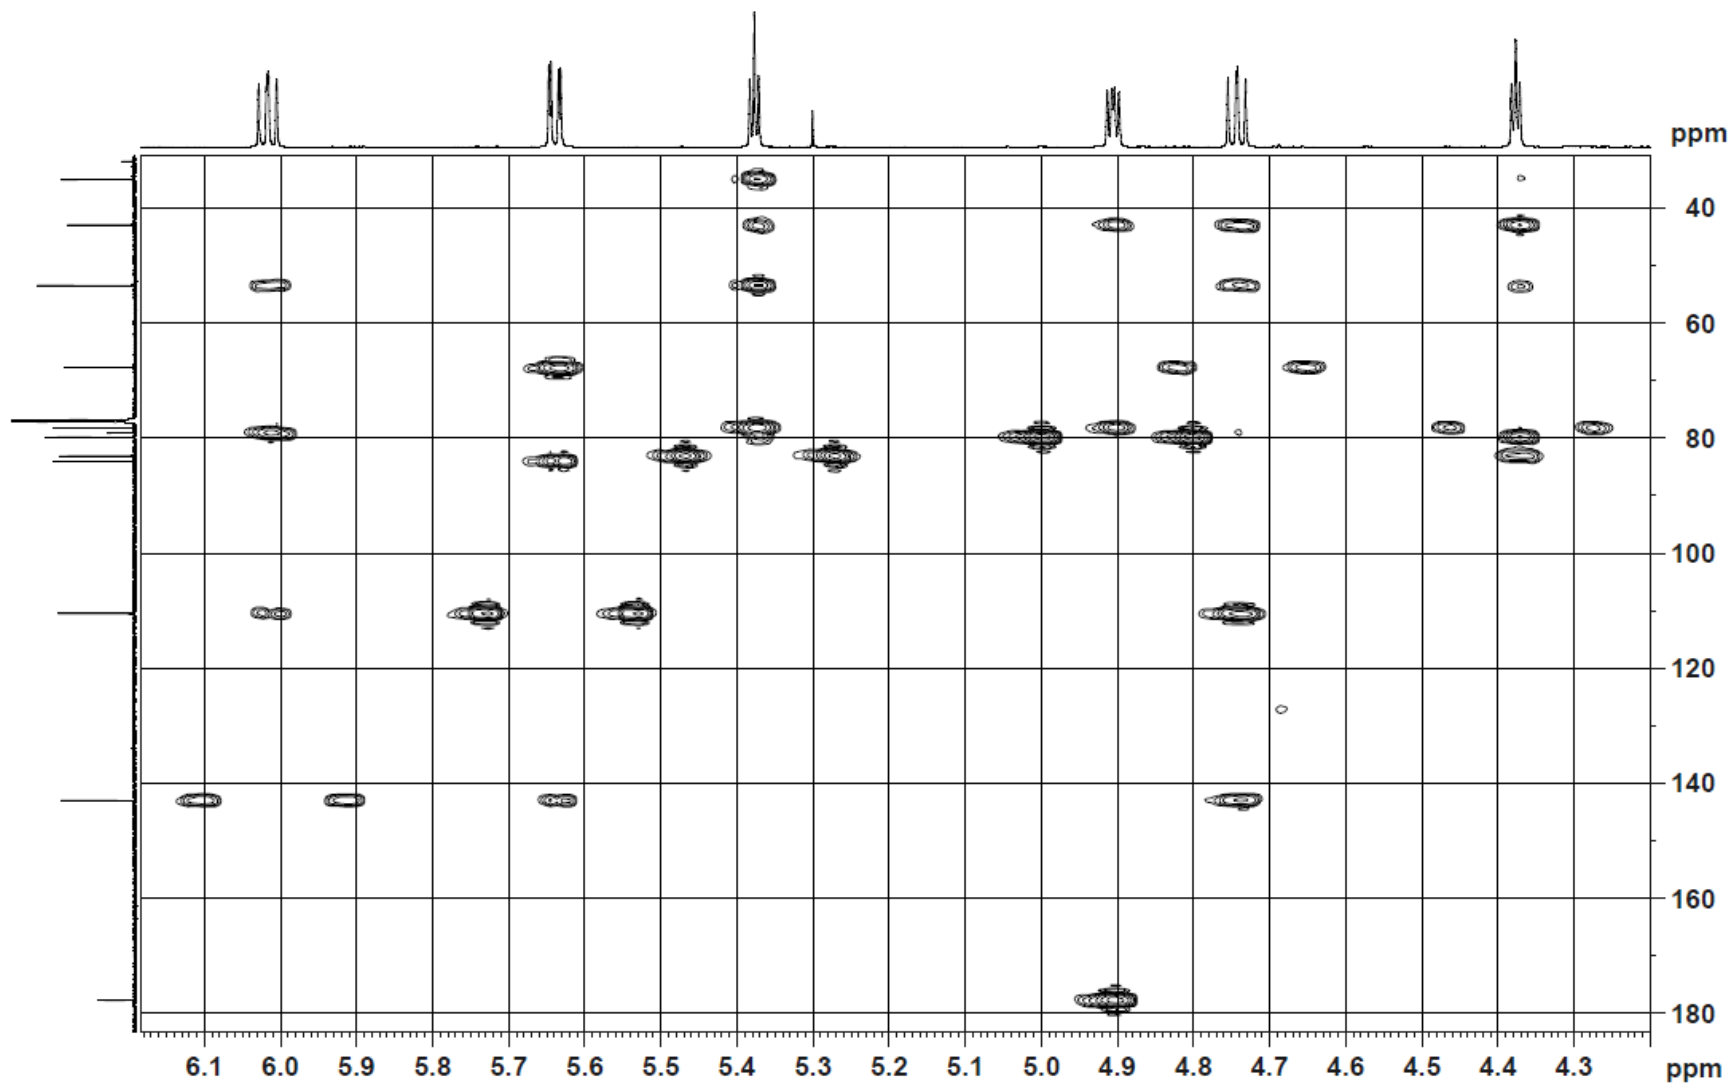

Figure S1m: HMBC NMR of compound 1

Dr. Walied

Sample : NL-235-1

CDCL<sub>3</sub>

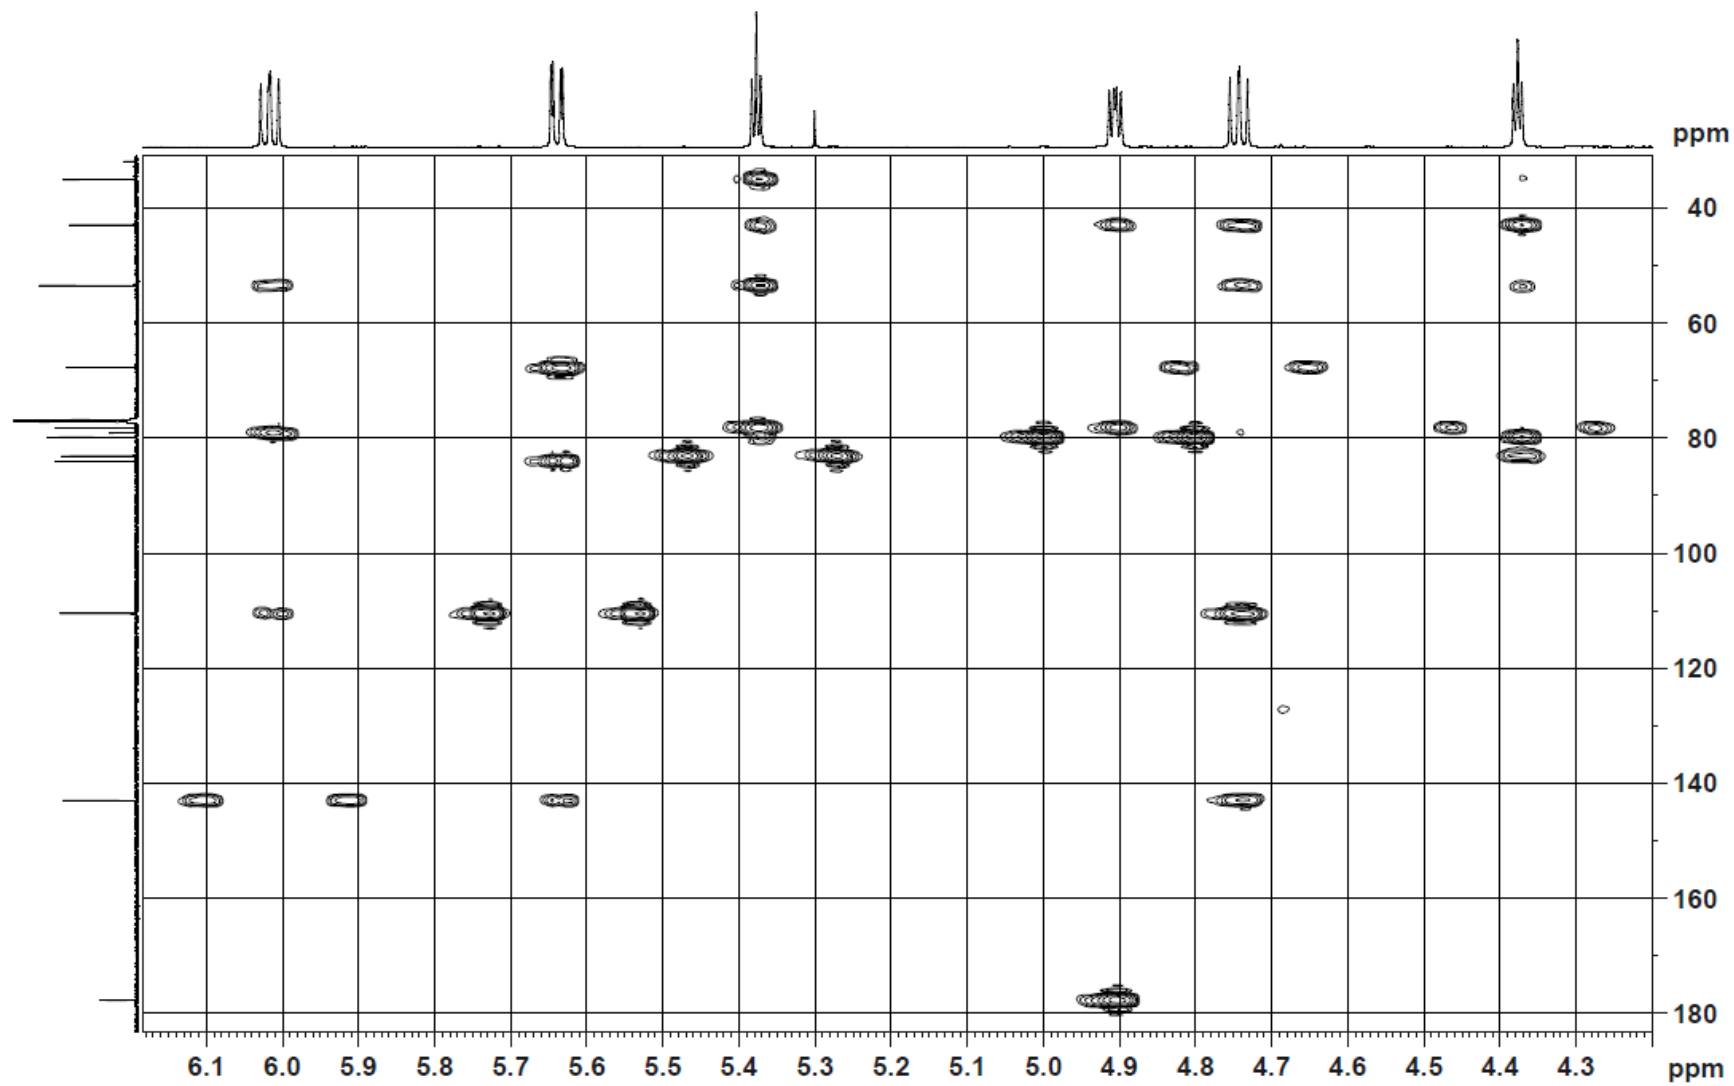

Figure S1n: HMBC NMR of compound 1



Dr. Walied  
Sample : NL-235-1 CDCL3

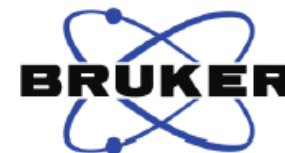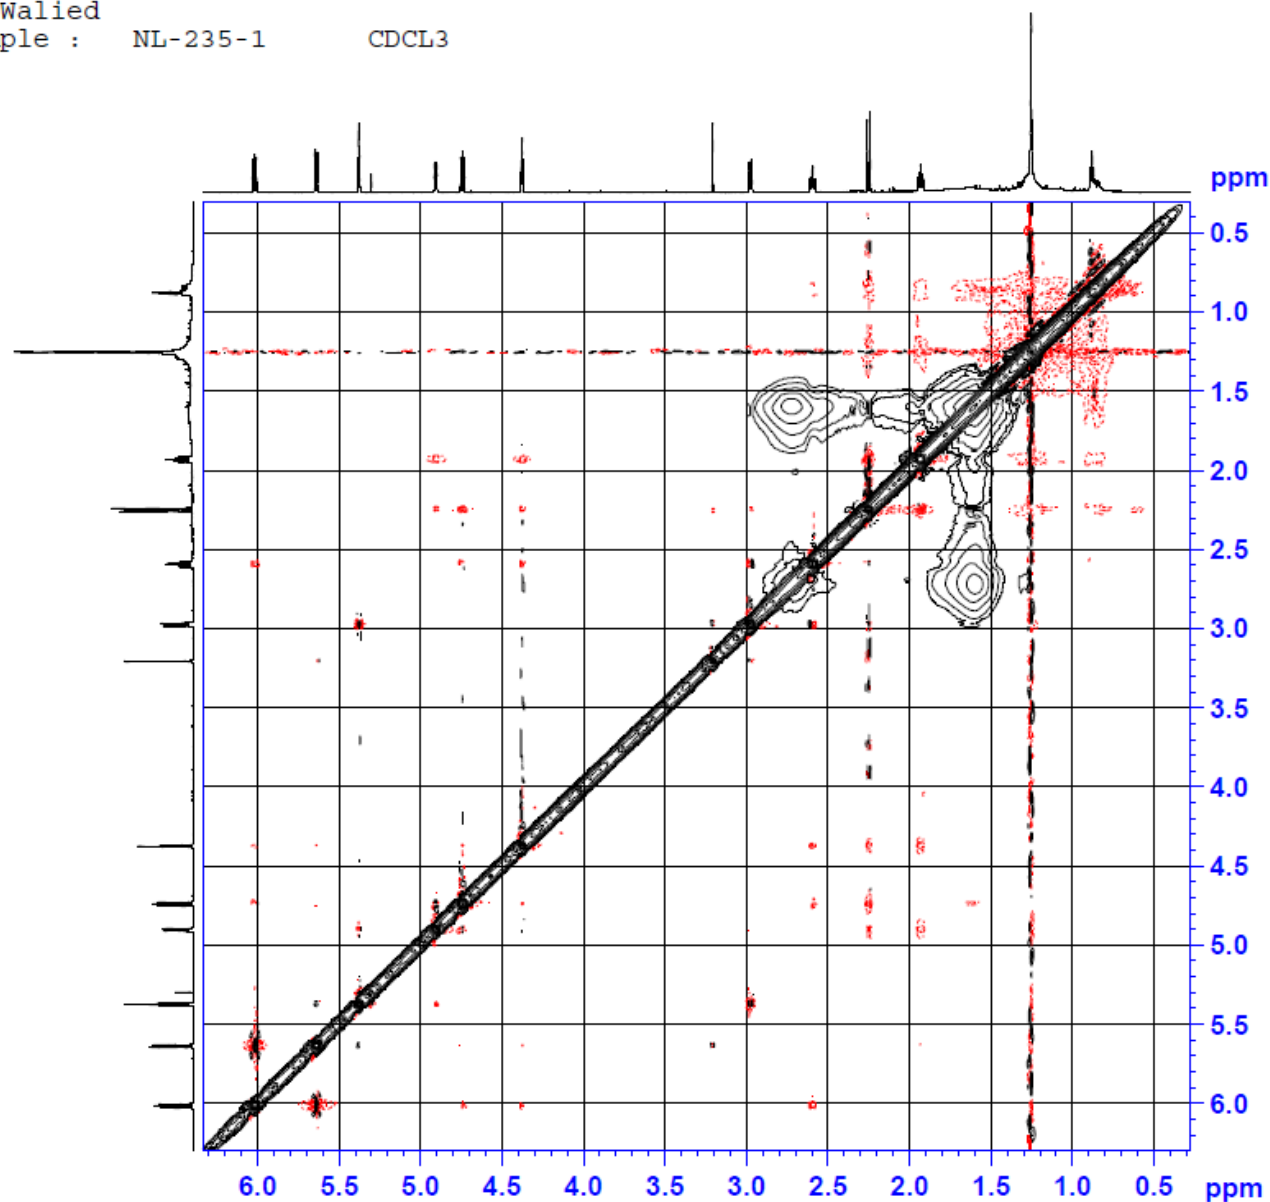

Current Data Parameters  
NAME WALIED NL-2351 23-02-2017  
EXPNO 14  
PROCNO 1

F2 - Acquisition Parameters  
Date\_ 20170223  
Time\_ 17.43  
INSTRUM spect  
PROBHD 5 mm CPQCI 1H-  
PULPROG noesyggpphpg  
TD 2048  
SOLVENT CDCL3  
NS 32  
DS 32  
SWH 7812.500 Hz  
FIDRES 3.814697 Hz  
AQ 0.1310720 sec  
RG 15.7  
DW 64.000 usec  
DE 10.00 usec  
TE 298.0 K  
D0 0.00005381 sec  
D1 1.98934996 sec  
D8 0.30000001 sec  
D11 0.03000000 sec  
D12 0.00002000 sec  
D16 0.00020000 sec  
IN0 0.00012800 sec

----- CHANNEL f1 -----  
SFO1 850.1530380 MHz  
NUC1 1H  
P1 8.00 usec  
P2 16.00 usec  
P17 2500.00 usec  
PLW1 15.30000019 W  
PLW10 1.70000005 W

----- GRADIENT CHANNEL -----  
GPNAM[1] SMCQ10.100  
GPZ1 40.00 %  
P16 1000.00 usec

F1 - Acquisition parameters  
TD 256  
SFO1 850.153 MHz  
FIDRES 30.517578 Hz  
SW 9.190 ppm  
FnMODE States-TPPI

F2 - Processing parameters  
SI 1024  
SF 850.1500200 MHz  
WDW QSINE  
SSB 2  
LB 0 Hz  
GB 0  
PC 1.00

F1 - Processing parameters  
SI 1024  
MC2 States-TPPI  
SF 850.1500200 MHz  
WDW QSINE  
SSB 2  
LB 0 Hz  
GB 0

Figure S10: NOESY NMR of compound 1

Dr. Walied  
Sample : NL-235-1 CDCL3

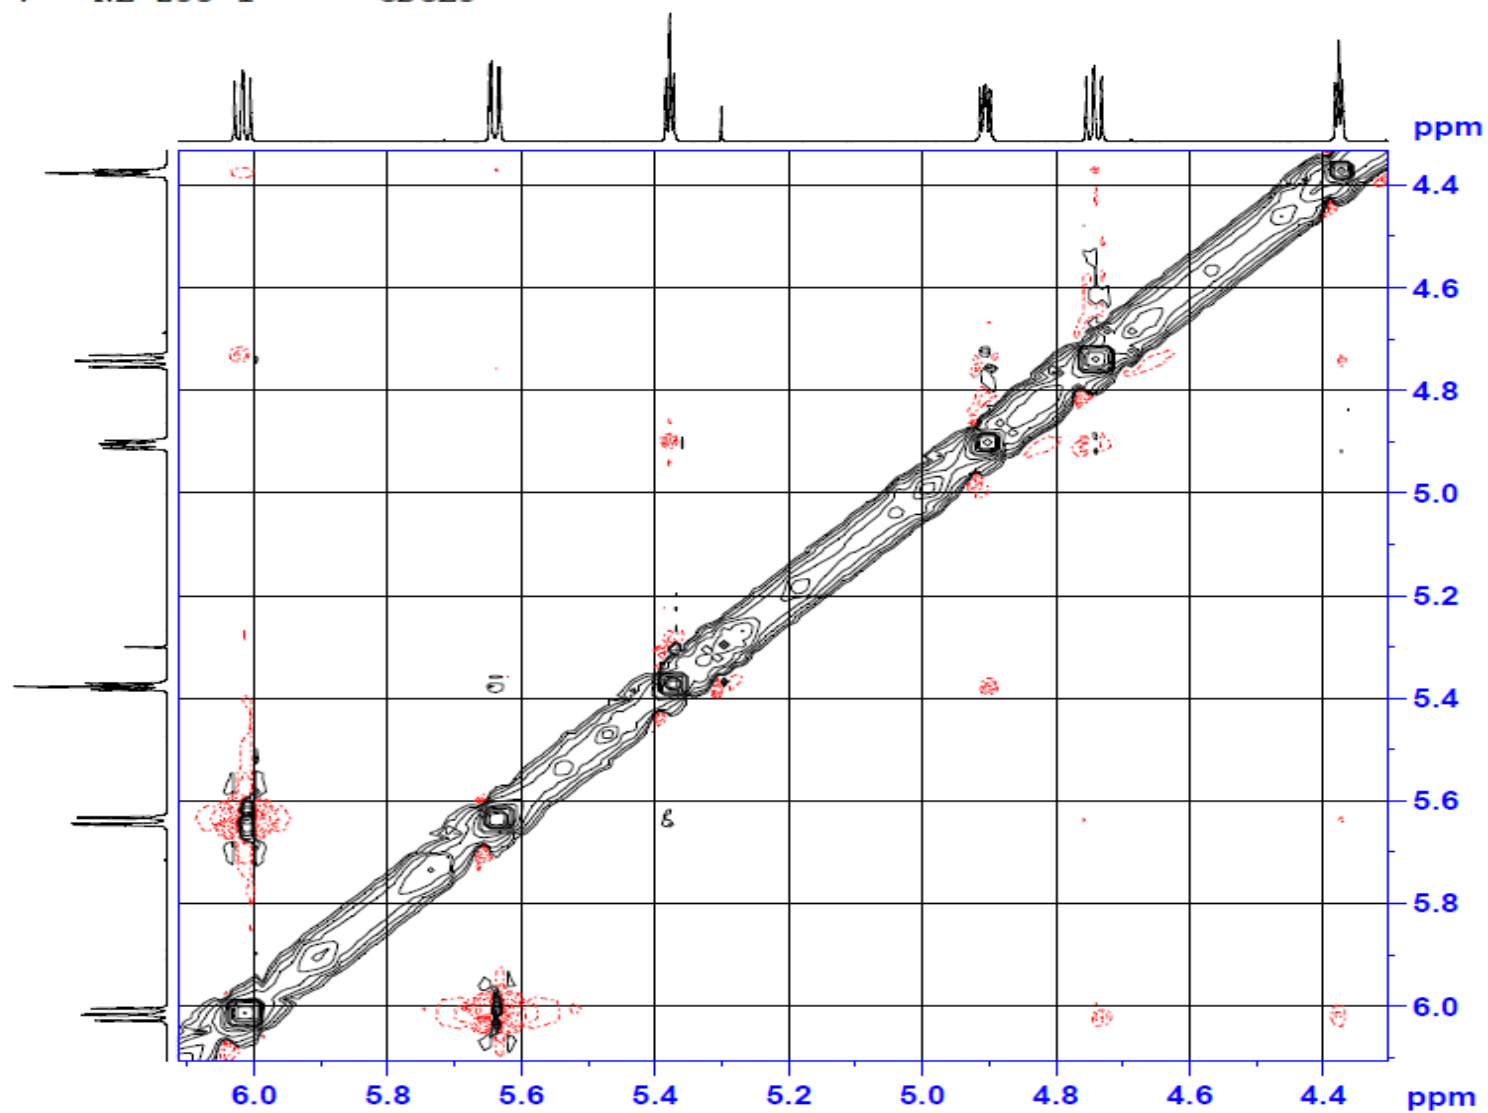

Figure S1p: NOESY NMR of compound 1

Dr. Walied

Sample : NL-235-1

CDCL3

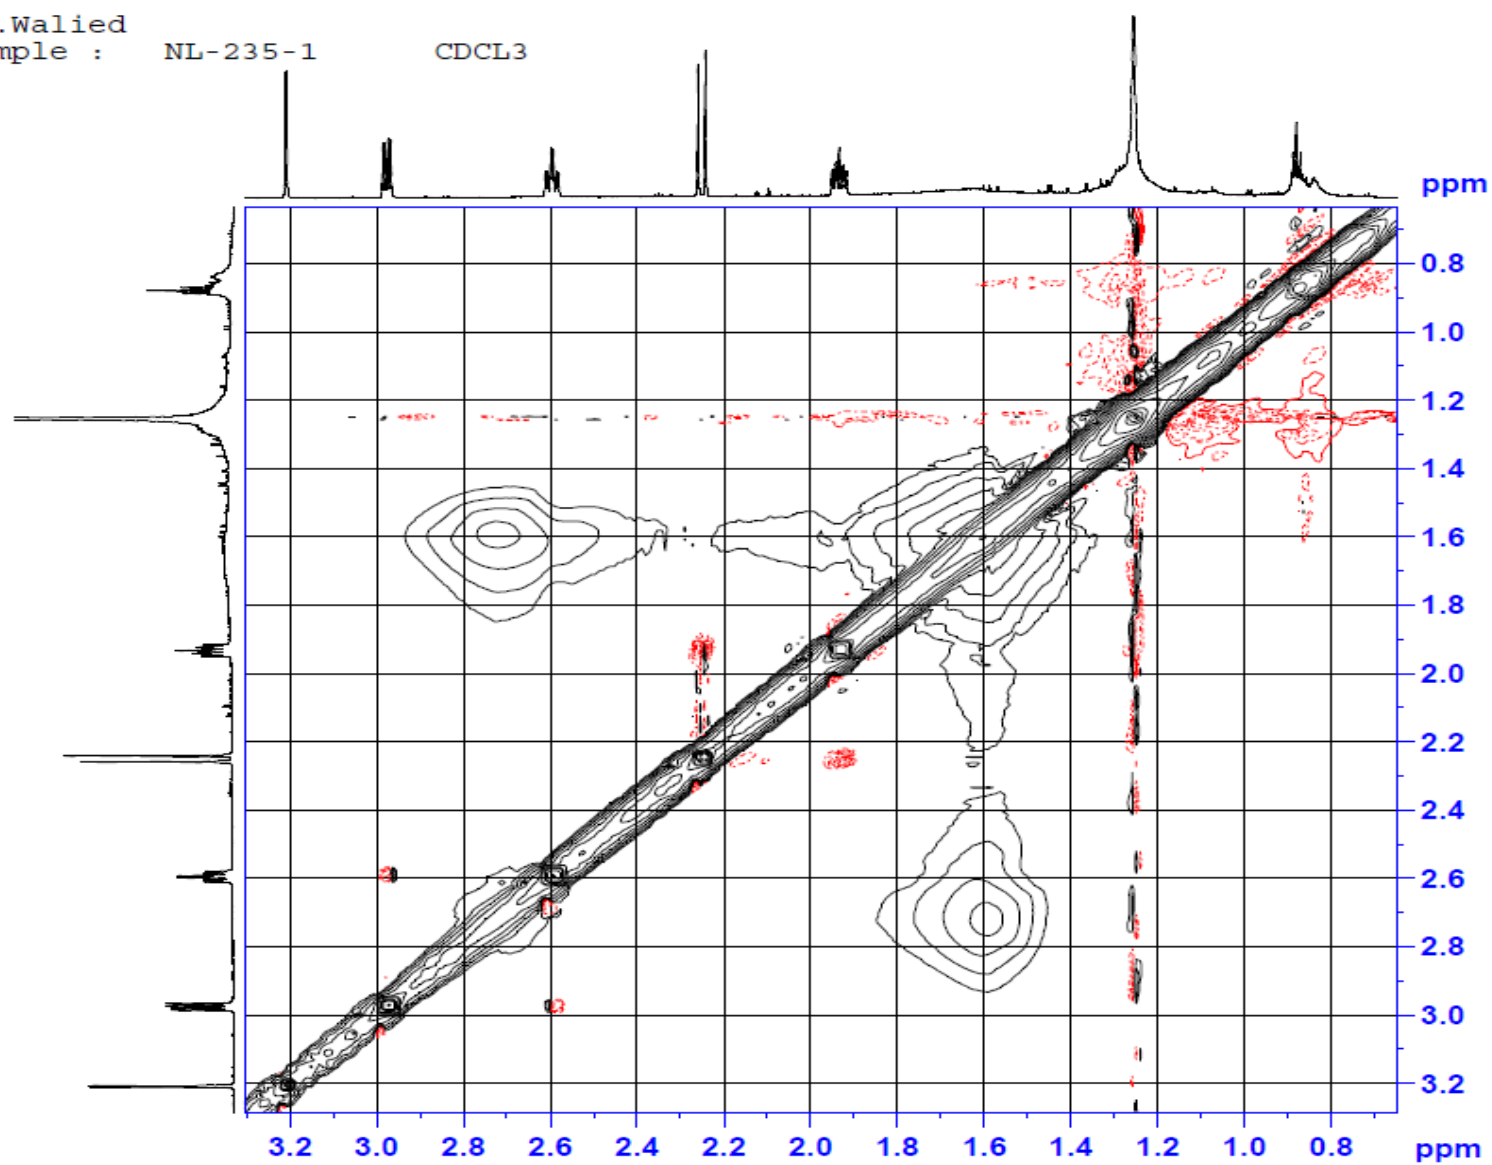

Figure S1q: NOESY NMR of compound 1

Dr. Walied

Sample : NL-229-2 CDCL3

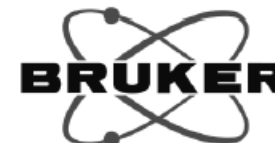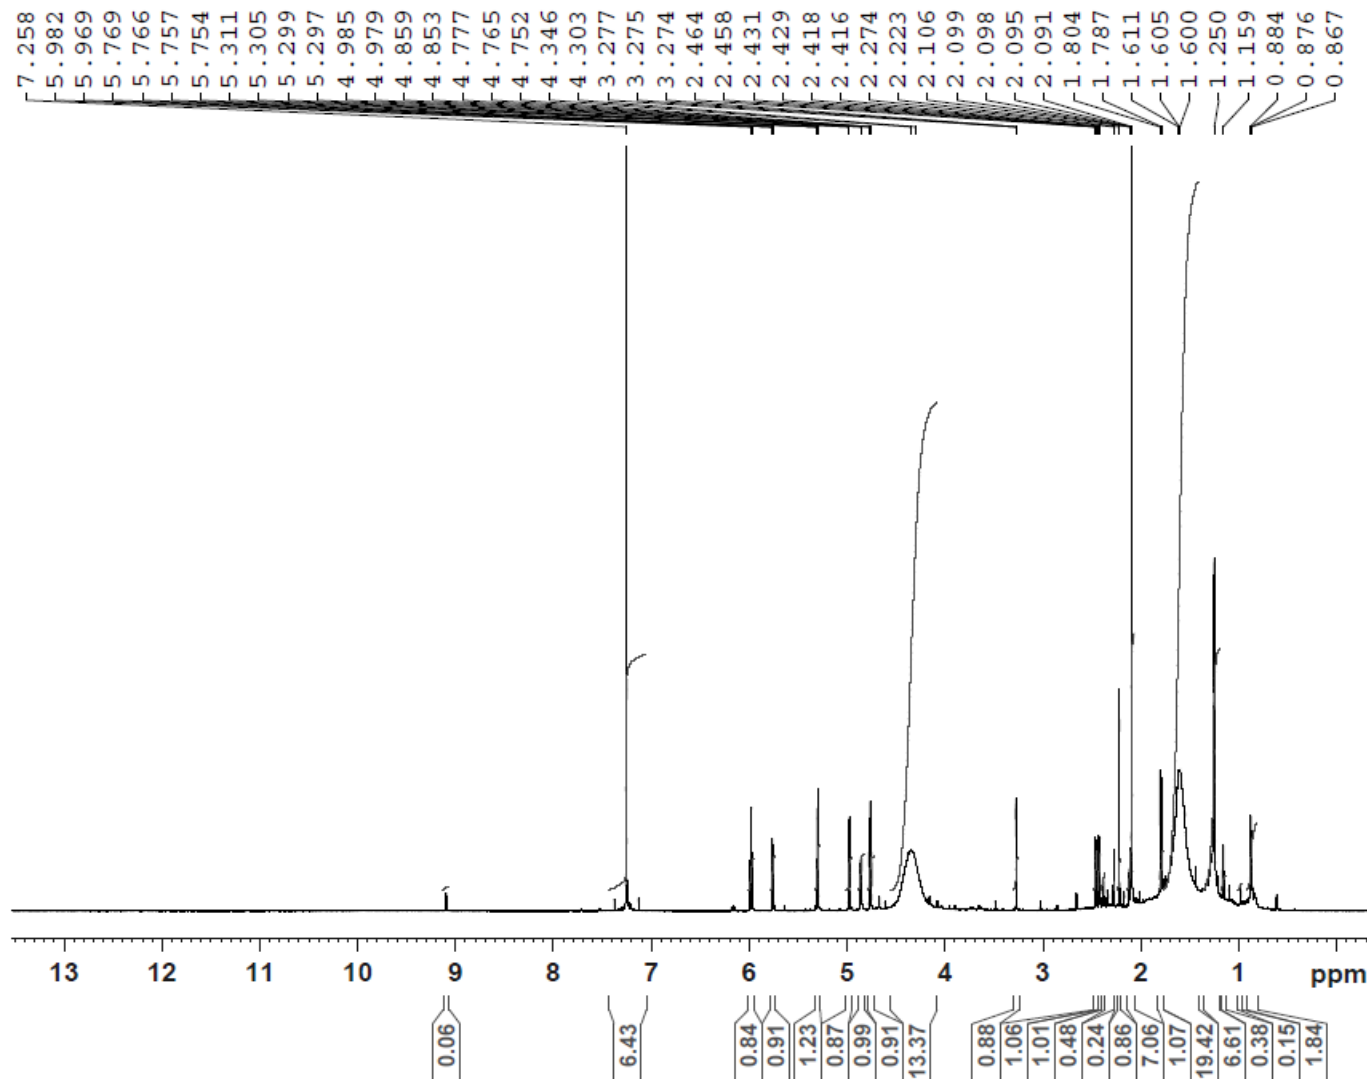

Current Data Parameters  
NAME WALIED NL-229-2 21-02-2017  
EXPNO 20  
PROCNO 1

F2 - Acquisition Parameters  
Date\_ 20170221  
Time\_ 10.14  
INSTRUM spect  
PROBHD 5 mm CPQCI 1H-  
PULPROG zg30  
TD 65536  
SOLVENT CDCl3  
NS 32  
DS 2  
SWH 17006.803 Hz  
FIDRES 0.259503 Hz  
AQ 1.9267584 sec  
RG 10.55  
DM 29.400 usec  
DE 10.00 usec  
TE 298.0 K  
D1 1.00000000 sec  
TDO 1

----- CHANNEL f1 -----  
SFO1 850.1552500 MHz  
NUC1 1H  
P1 8.00 usec  
PLW1 15.30000019 W

F2 - Processing parameters  
SI 65536  
SF 850.1500200 MHz  
WDW EM  
SSB 0  
LB 0.30 Hz  
GB 0  
PC 2.00

Figure S2a: <sup>1</sup>H NMR of compound 2

Dr. Walied

Sample : NL-229-2 CDCL<sub>3</sub>

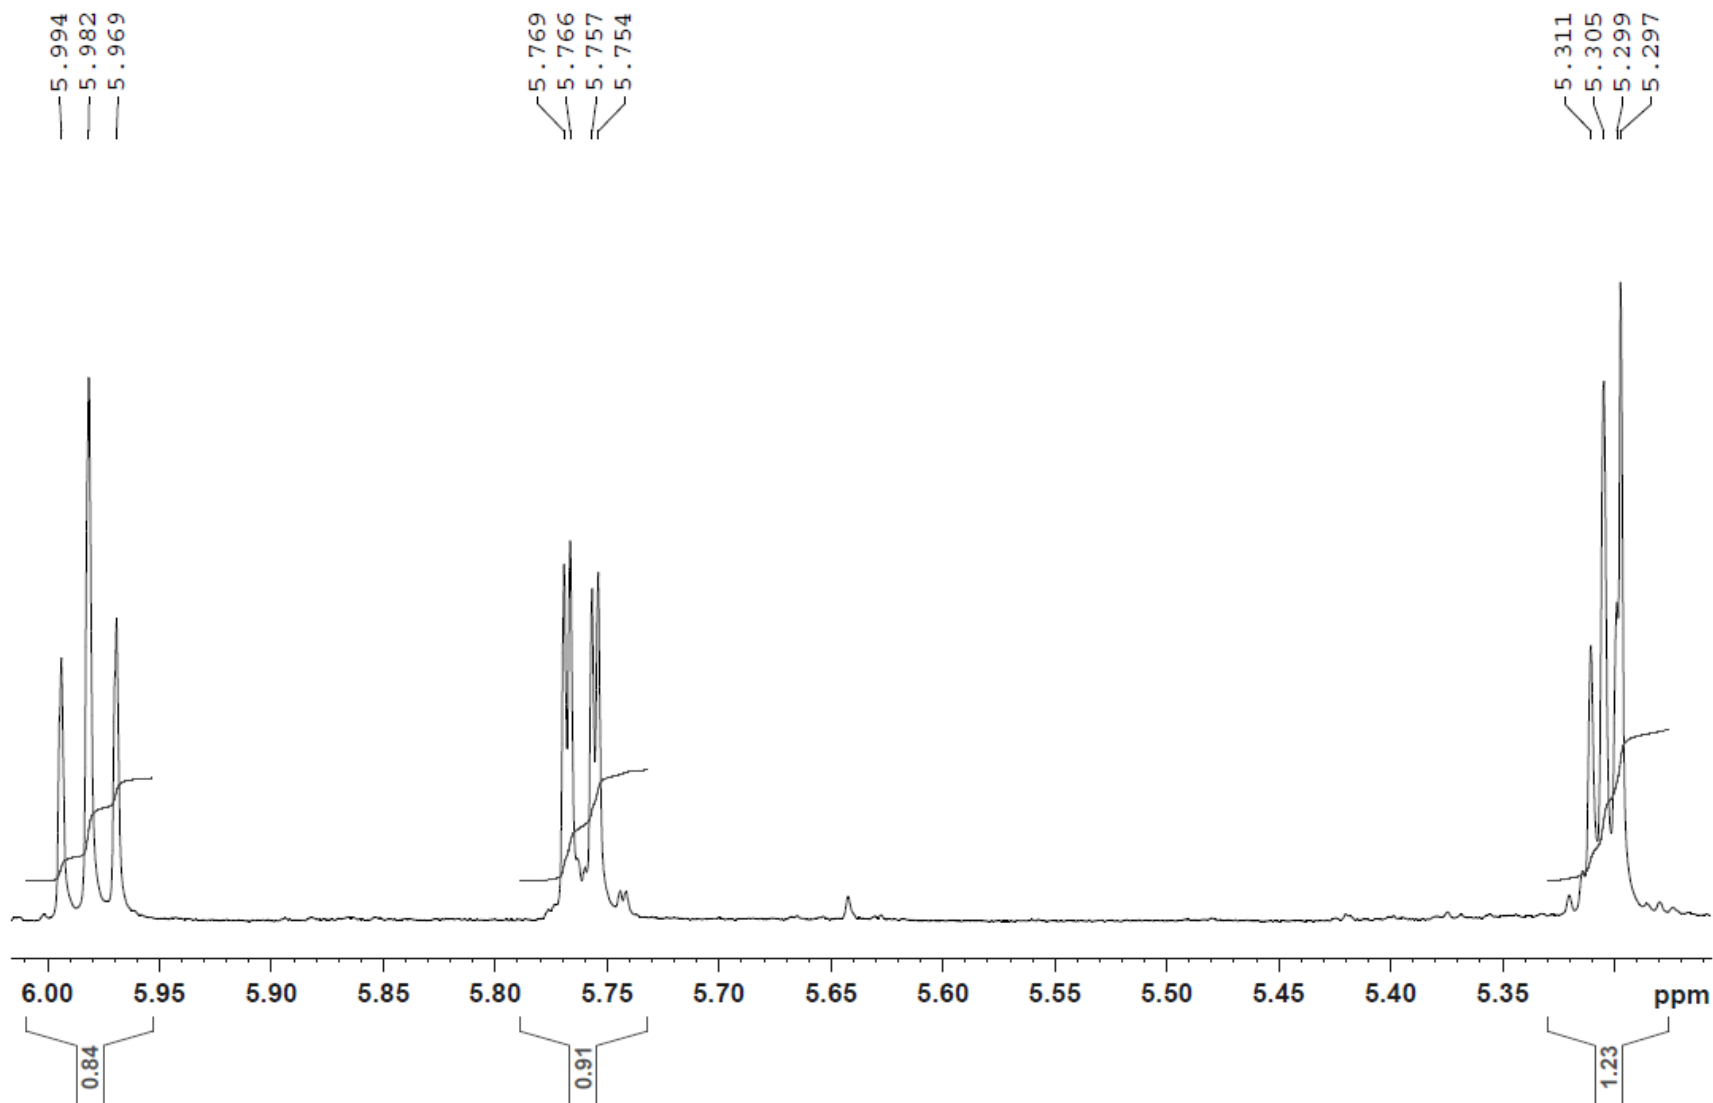

Figure S2a: <sup>1</sup>H NMR of compound 2

Dr. Walied

Sample : NL-229-2 CDCL<sub>3</sub>

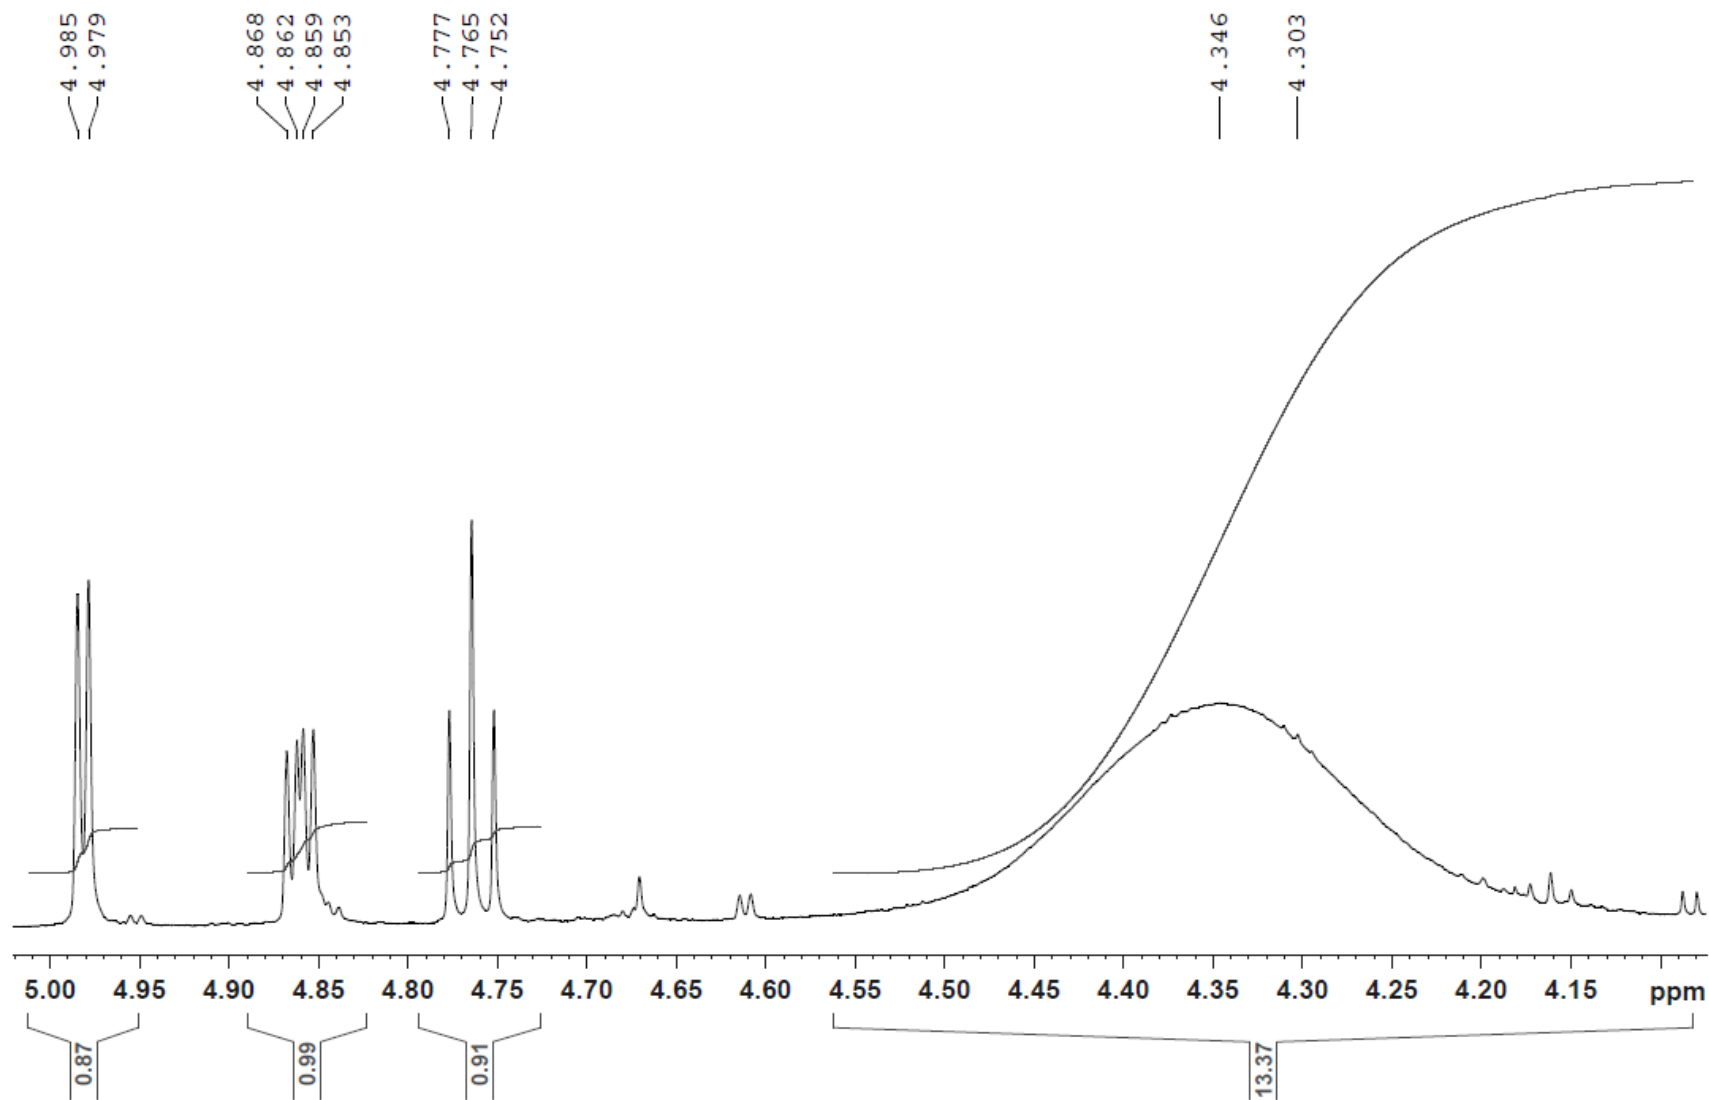

Figure S2b: <sup>1</sup>H NMR of compound 2

Dr. Walled

Sample : NL-229-2

CDCL<sub>3</sub>

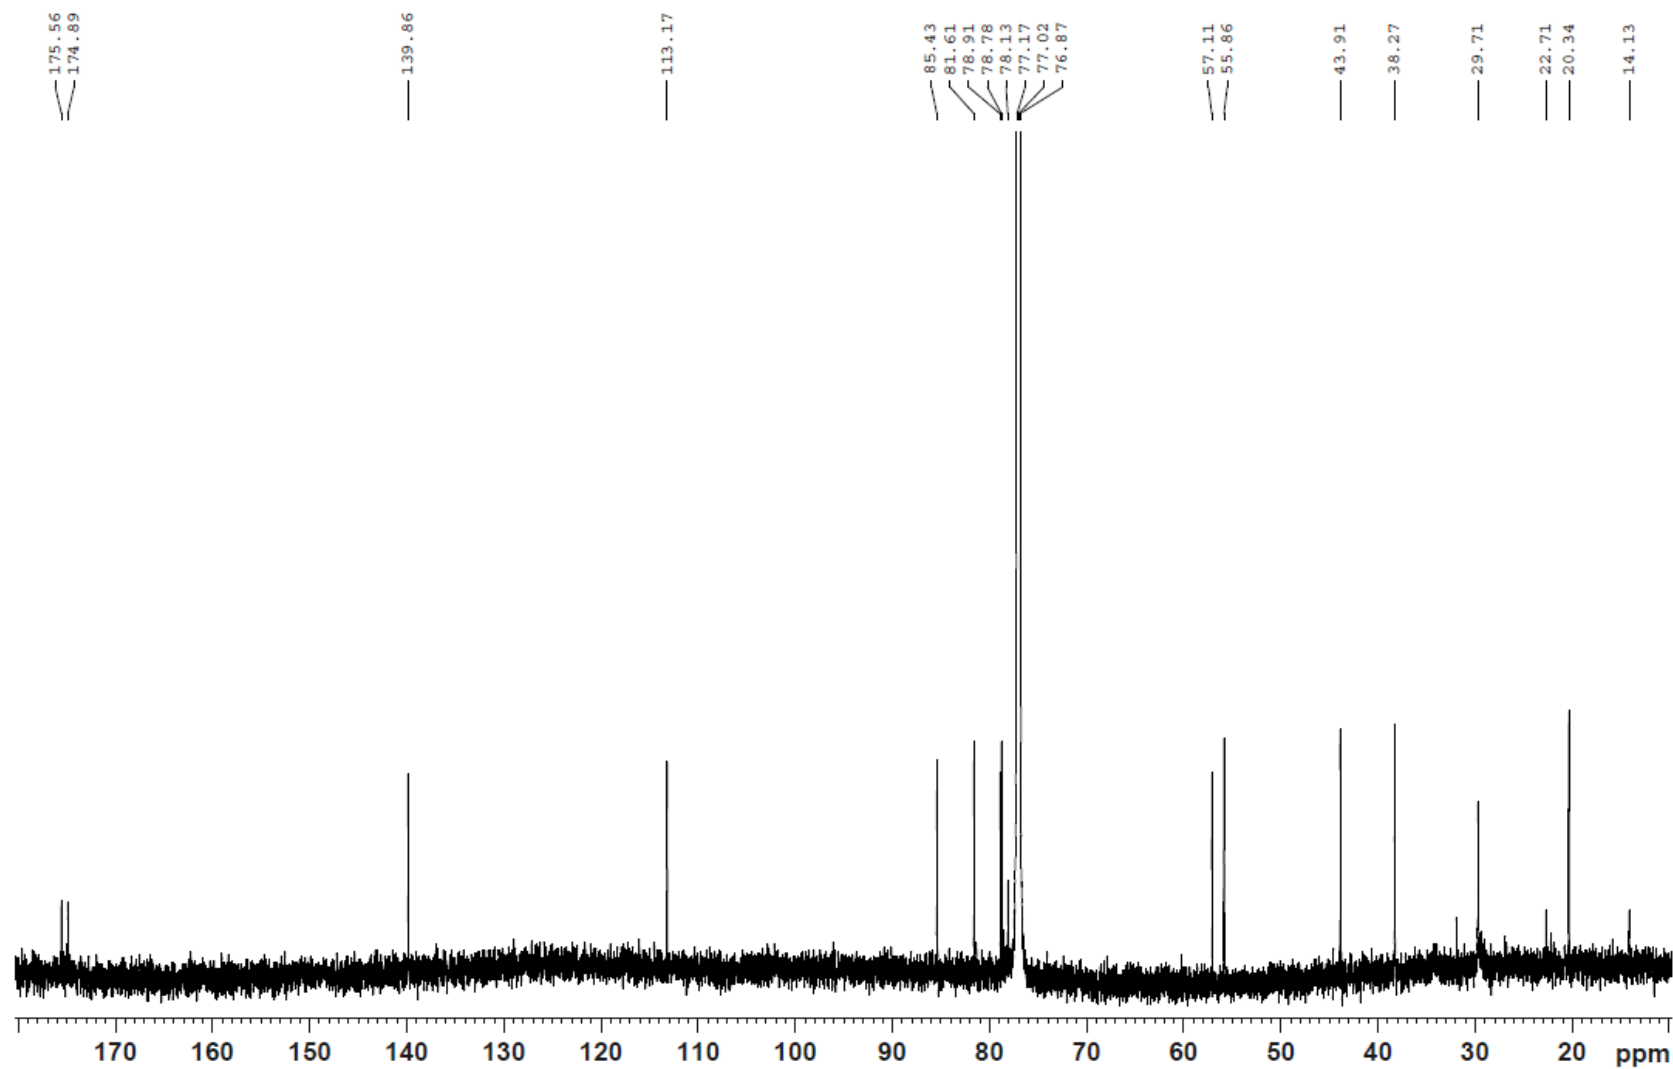

Figure S2c: <sup>13</sup>C NMR of compound 2

Dr. Walied  
Sample : NL-229-2 CDCL3

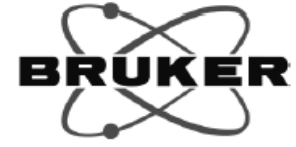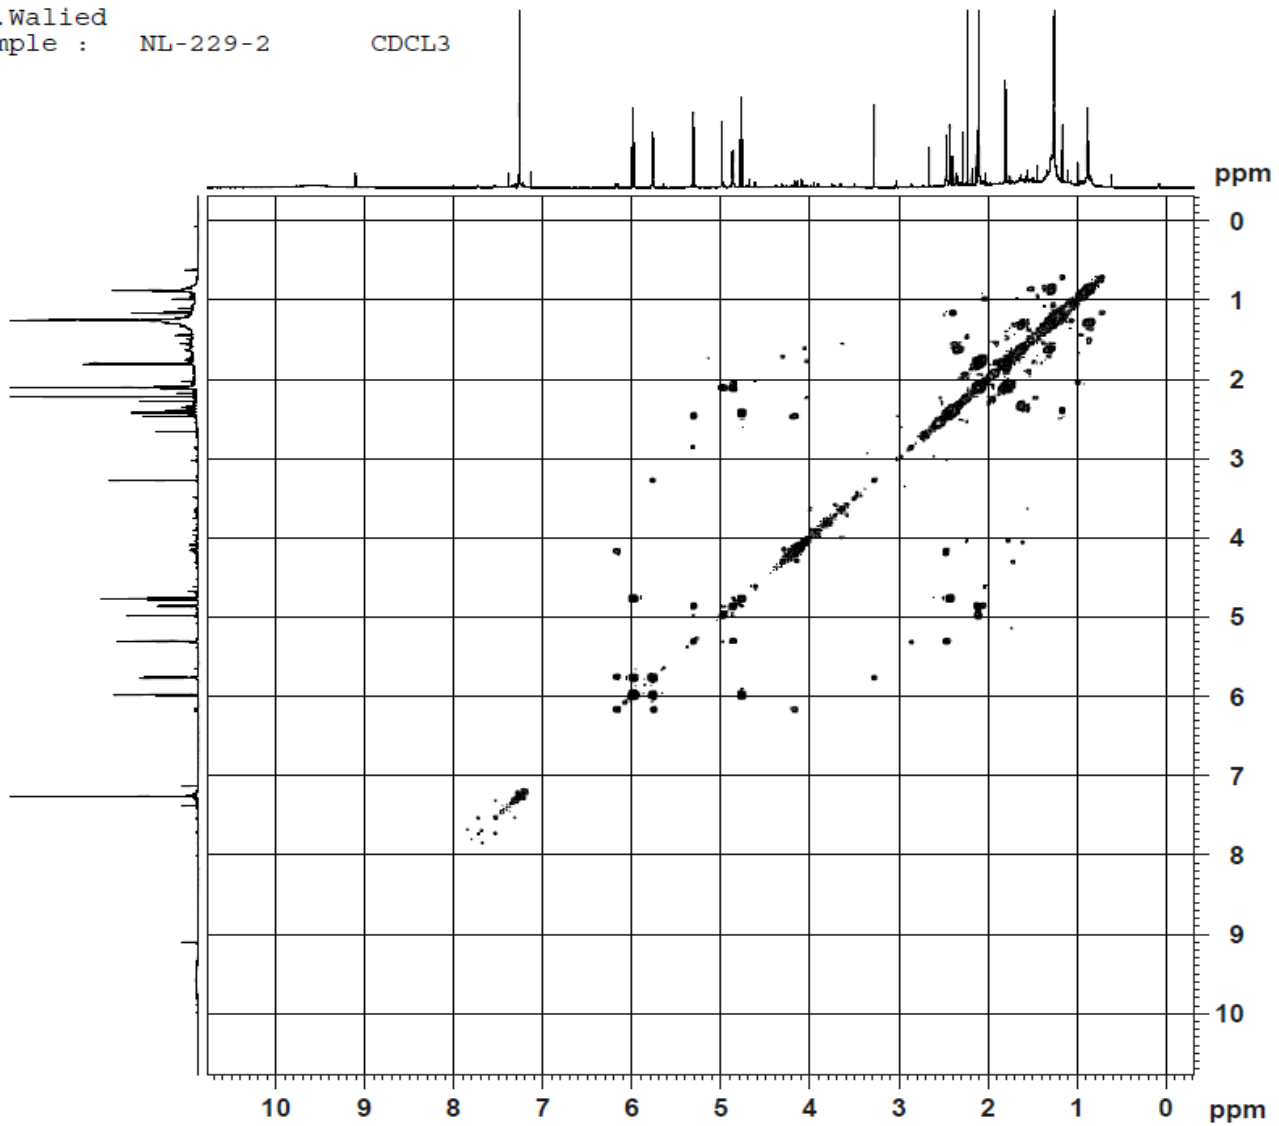

```
Current Data Parameters
NAME  WALIRD  NL-2292  23-02-2017
EXPNO  43
PROCNO  1

F2 - Acquisition Parameters
Date_   20170226
Time    11.17
INSTRUM spect
PROBHD  5 mm CPQCI 1H-
PULPROG cosygpmEqf
TD      2048
SOLVENT CDCL3
NS      16
DS      8
SWH     9433.962 Hz
FIDRES  4.606427 Hz
AQ      0.1085440 sec
RG      186.93
DW      53.000 usec
DE      10.00 usec
TE      298.0 K
DO      0.00000300 sec
D1      1.98156798 sec
D13     0.00000400 sec
D16     0.00020000 sec
IN0     0.00010600 sec

----- CHANNEL f1 -----
SFO1    850.1544606 MHz
NUC1    1H
P1      8.00 usec
PLW1    15.30000019 W

----- GRADIENT CHANNEL -----
GPNAM[1] SMSQ10.100
GPNAM[2] SMSQ10.100
GPNAM[3] SMSQ10.100
GPZ1    16.00 %
GPZ2    12.00 %
GPZ3    40.00 %
P16     1000.00 usec

F1 - Acquisition parameters
TD      128
SFO1    850.1545 MHz
FIDRES  73.702827 Hz
SW      11.097 ppm
PrMODE  QF

F2 - Processing parameters
SI      1024
SF      850.1500200 MHz
WDW     SINE
SSB     0
LB      0 Hz
GB      0
PC      1.40

F1 - Processing parameters
SI      1024
MC2     QF
SF      850.1500200 MHz
WDW     SINE
SSB     0
LB      0 Hz
GB      0
```

Figure S2d: COSY NMR of compound 2



Dr. Walied

Sample : NL-229-2

CDCL<sub>3</sub>

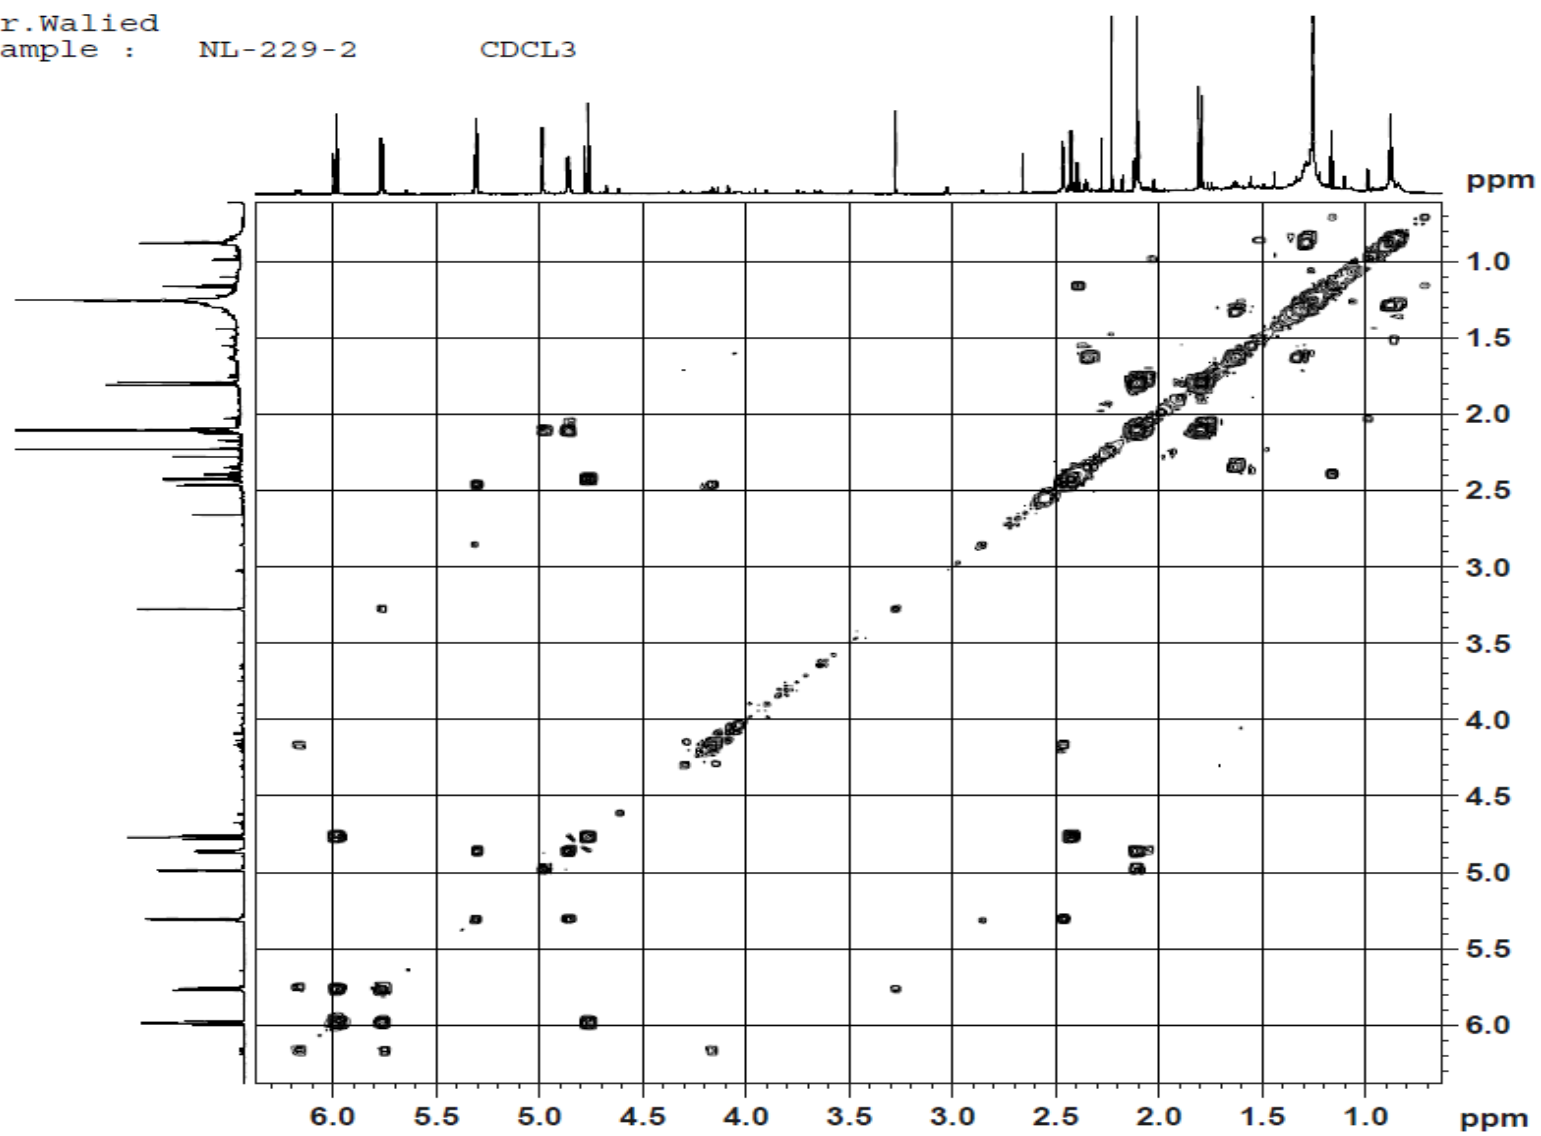

Figure S2e: COSY NMR of compound 2

Dr. Walied  
Sample : NL-229-2 CDCL<sub>3</sub>

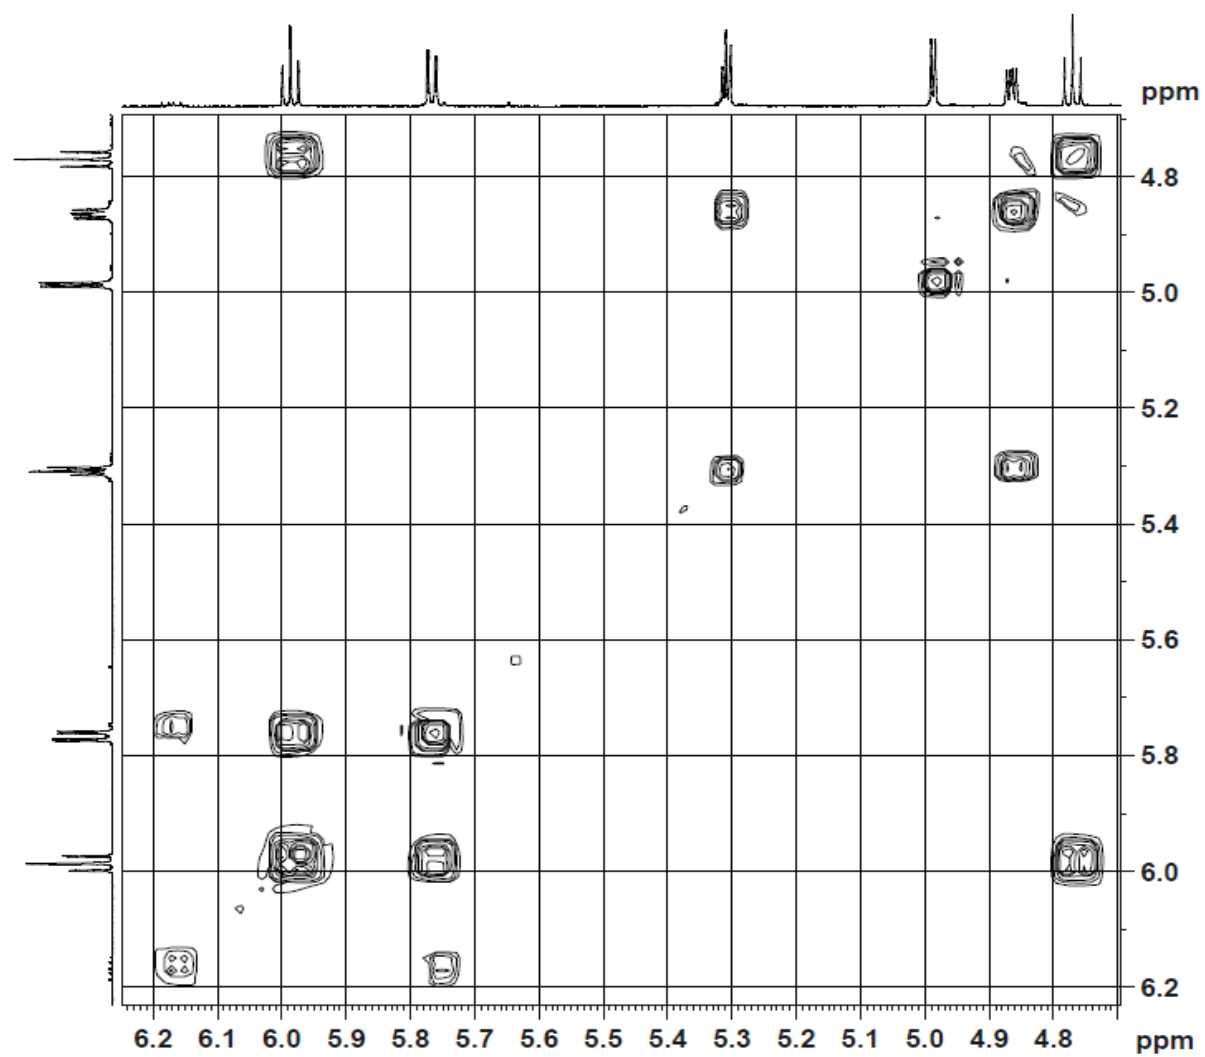

Figure S2f: COSY NMR of compound 2



Dr. Walied  
Sample : NL-229-2 CDCL3

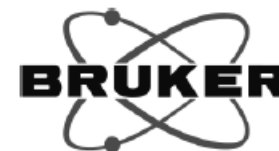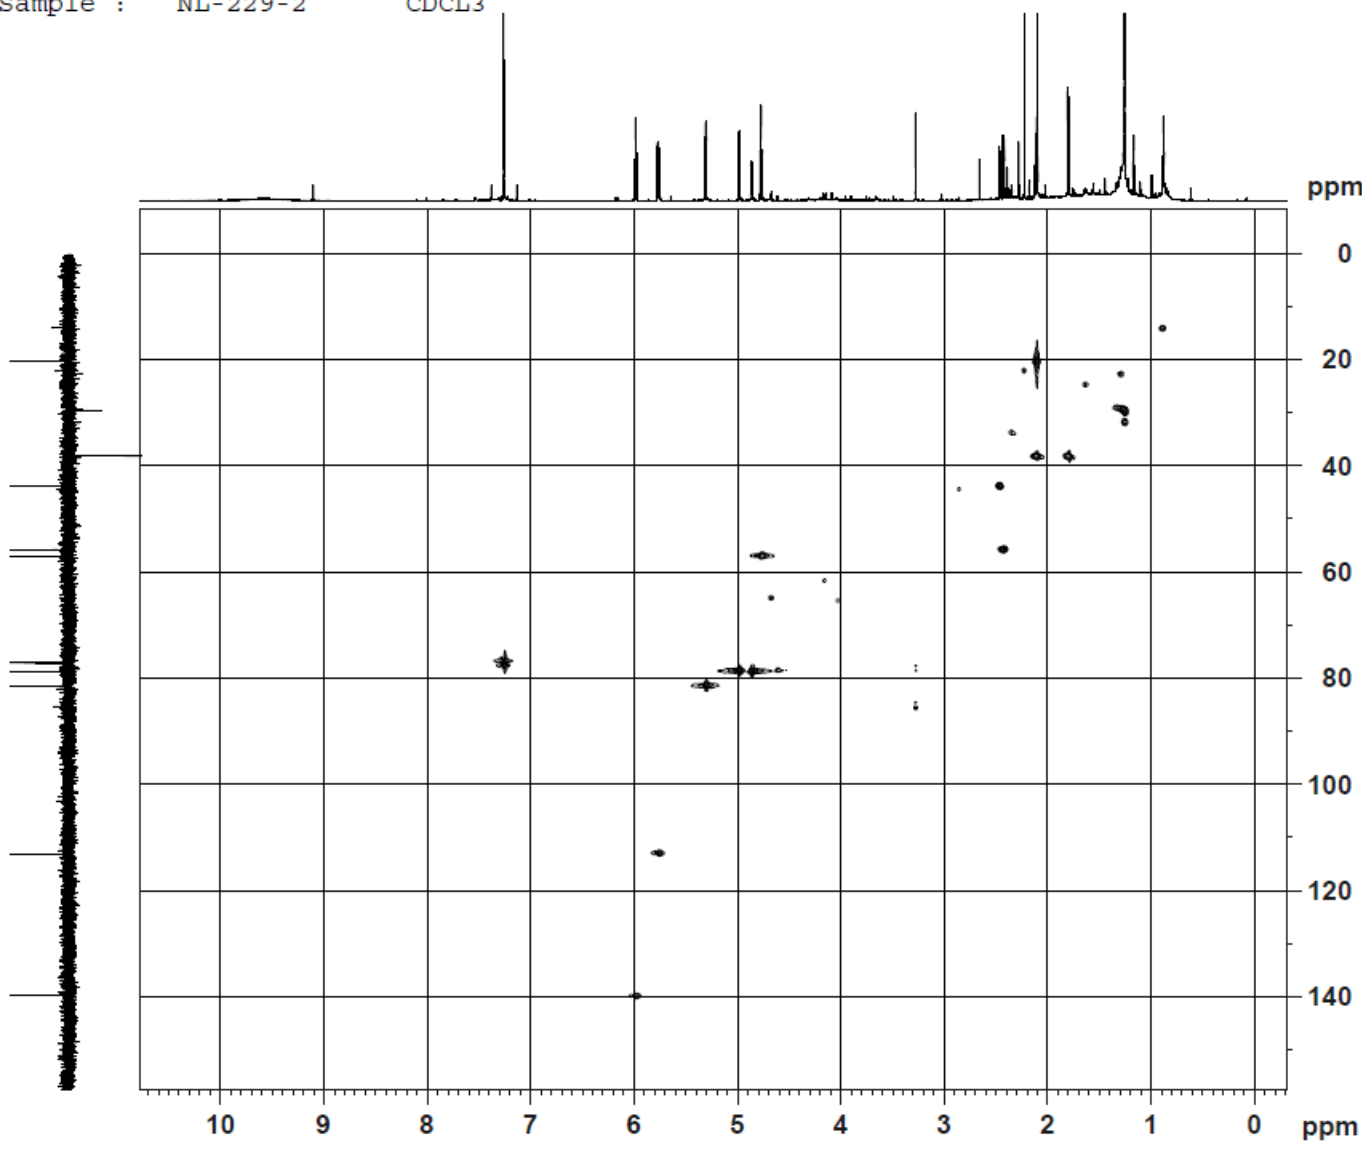

Current Data Parameters  
NAME WALIED NL-2292 23-02-2017  
EXPNO 45  
PROCNO 1

F2 - Acquisition Parameters  
Date\_ 20170226  
Time 18.10  
INSTRUM spect  
PROBHD 5 mm CPQCI 1H  
PULPROG hsqcadtgpp  
TD 1024  
SOLVENT CDCL3  
NS 32  
DS 16  
SMH 9433.962 Hz  
FIDRES 9.212853 Hz  
AQ 0.0542720 sec  
RG 186.93  
DM 53.000 usec  
DE 10.00 usec  
TE 298.0 K  
CNS2 145.0000000  
D0 0.00000300 sec  
D1 1.49214900 sec  
D4 0.00172414 sec  
D11 0.03000000 sec  
D13 0.00000400 sec  
D16 0.00020000 sec  
D21 0.00345000 sec  
INO 0.00001410 sec  
ZGPPPM

----- CHANNEL f1 -----  
SP01 850.1544606 MHz  
NUC1 1H  
P1 8.00 usec  
P2 16.00 usec  
P2B 0 usec  
PLW1 15.30000019 W  
----- CHANNEL f2 -----  
SP02 213.7863316 MHz  
NUC2 13C  
CPDPRG2 garp  
P3 12.00 usec  
P4 24.00 usec  
PCPD2 45.00 usec  
PLW2 130.00000000 W  
PLW12 9.24440002 W

----- GRADIENT CHANNEL -----  
GPMAM[1] SMSQ10.100  
GPMAM[2] SMSQ10.100  
GPZ1 80.00 %  
GPZ2 20.10 %  
PLG 1000.00 usec

F1 - Acquisition parameters  
TD 256  
SP01 213.7863 MHz  
FIDRES 138.519501 Hz  
SW 165.871 ppm  
PnMODE Echo-Antiacho

F2 - Processing parameters  
SI 1024  
SF 850.1500200 MHz  
WDW QSINE  
SSB 2  
LB 0 Hz  
GB 0  
PC 1.40

F1 - Processing parameters  
SI 1024  
MC2 echo-antiacho  
SF 213.7703875 MHz  
WDW QSINE  
SSB 2  
LB 0 Hz  
GB 0

Figure S2g: HSQC NMR of compound 2

Dr. Walied

Sample : NL-229-2

CDCL<sub>3</sub>

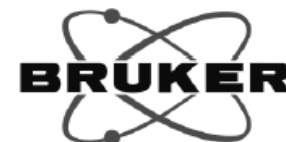

Current Data Parameters  
NAME WALIED NL-2292 23-02-2017  
EXPNO 46  
PROCNO 1

F2 - Acquisition Parameters  
Date\_ 20170226  
Time 21.47  
INSTRUM spect  
PROBHD 5 mm CPQCI 1H-  
PULPROG hmcgpgndqf  
TD 4096  
SOLVENT CDCl<sub>3</sub>  
NS 64  
DS 16  
SMH 9433.962 Hz  
FIDRES 2.303213 Hz  
AQ 0.2170880 sec  
RG 186.93  
DM 53.000 usec  
DE 10.00 usec  
TE 298.0 K  
CNST13 8.0000000  
D0 0.00000300 sec  
D1 1.46395504 sec  
D6 0.06250000 sec  
D16 0.00020000 sec  
INO 0.00001050 sec

----- CHANNEL f1 -----  
SFO1 850.1544606 MHz  
NUC1 1H  
P1 8.00 usec  
P2 16.00 usec  
PLW1 15.30000019 W

----- CHANNEL f2 -----  
SFO2 213.7917305 MHz  
NUC2 13C  
P3 12.00 usec  
PLW2 130.00000000 W

----- GRADIENT CHANNEL -----  
GPNAM[1] SMSQ10.100  
GPNAM[2] SMSQ10.100  
GPNAM[3] SMSQ10.100  
GPE1 50.00 %  
GPE2 30.00 %  
GPE3 40.10 %  
P16 1000.00 usec

F1 - Acquisition parameters  
TD 128  
SFO1 213.7917 MHz  
FIDRES 372.023804 Hz  
SW 222.736 ppm  
F1MODE QF

F2 - Processing parameters  
SI 1024  
SF 850.1500200 MHz  
WDW SINE  
SSB 0  
LB 0 Hz  
GB 0  
PC 1.40

F1 - Processing parameters  
SI 1024  
MC2 QF  
SF 213.7703875 MHz  
WDW SINE  
SSB 0  
LB 0 Hz  
GB 0

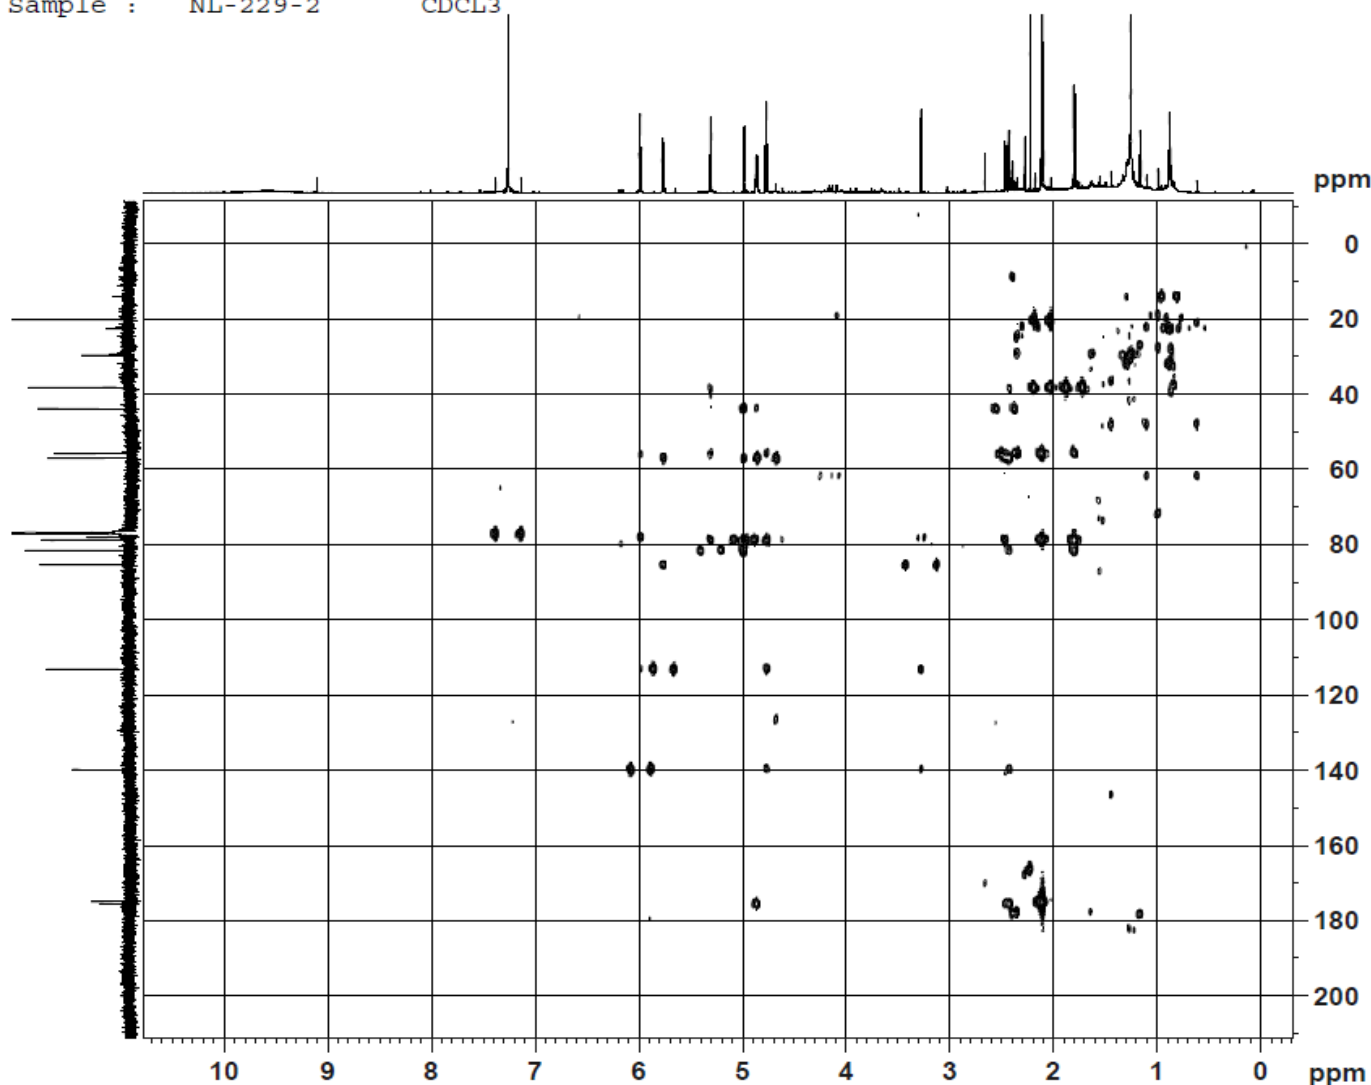

Figure S2h: HMBC NMR of compound 2

Dr. Walied

Sample : NL-229-2

CDCL<sub>3</sub>

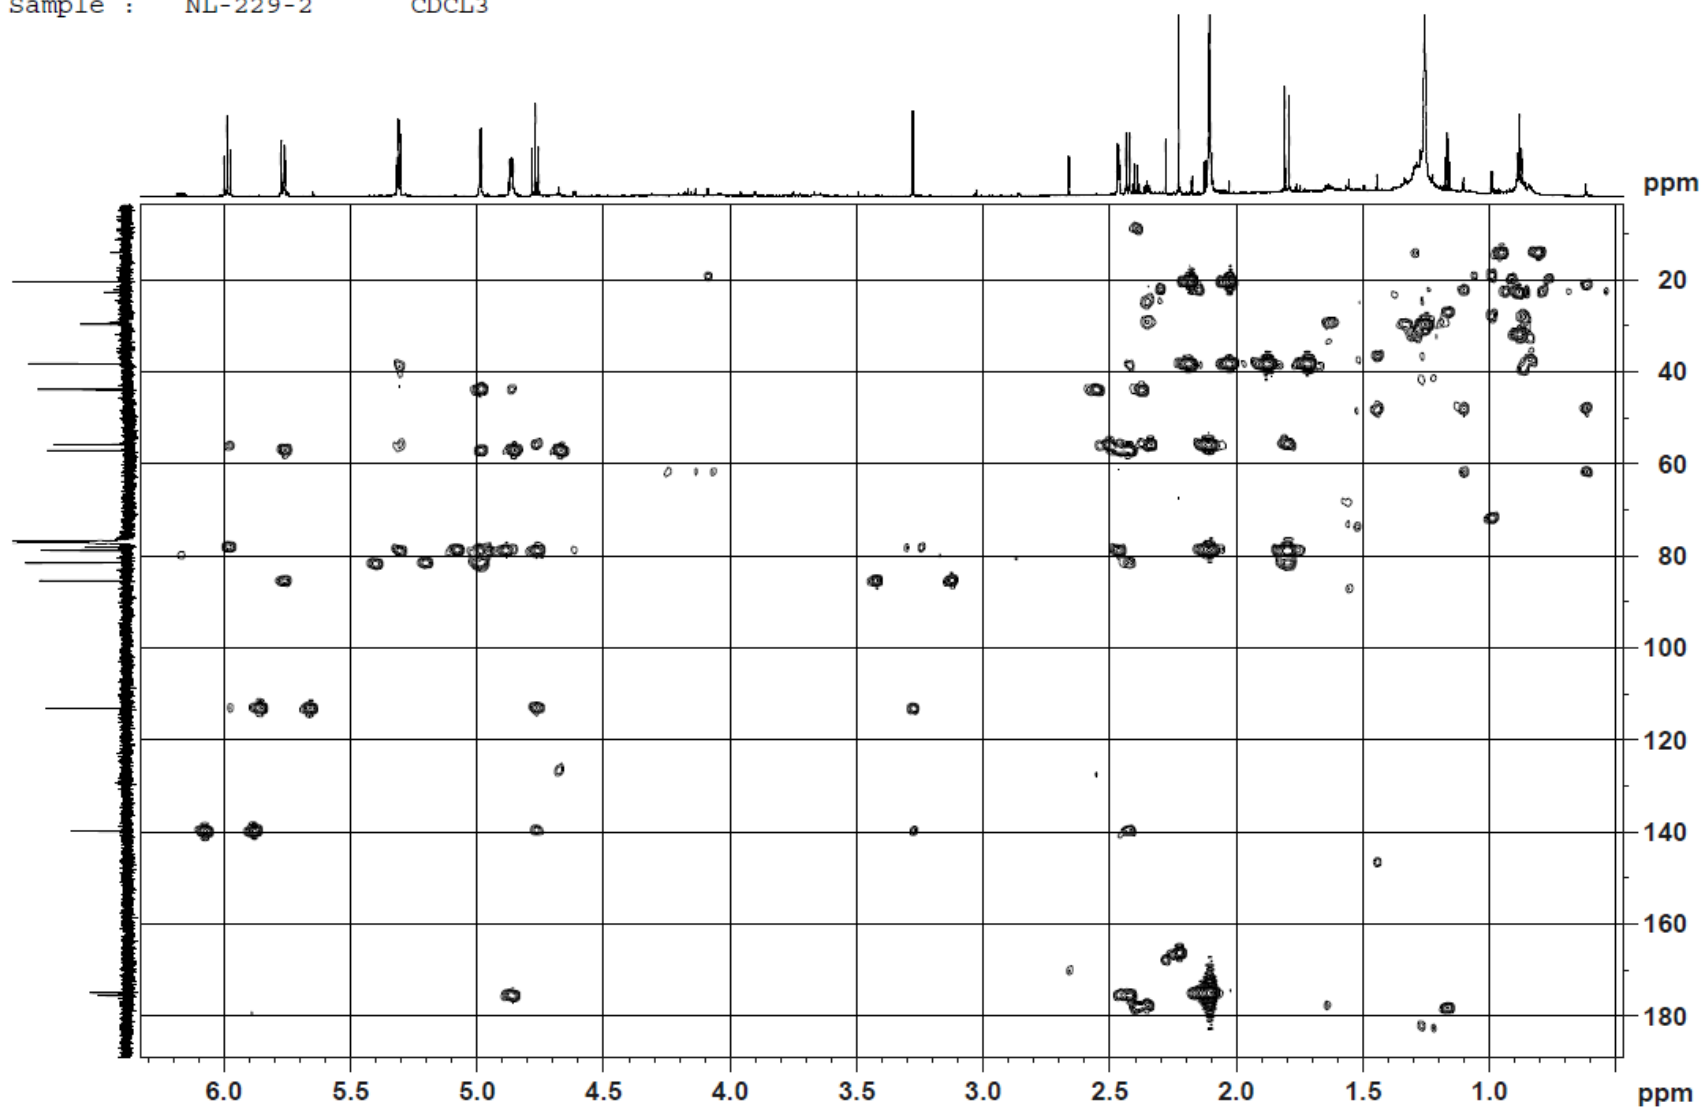

Figure S2i: HMBC NMR of compound 2

Dr. Walied

Sample : NL-229-2 CDCL3

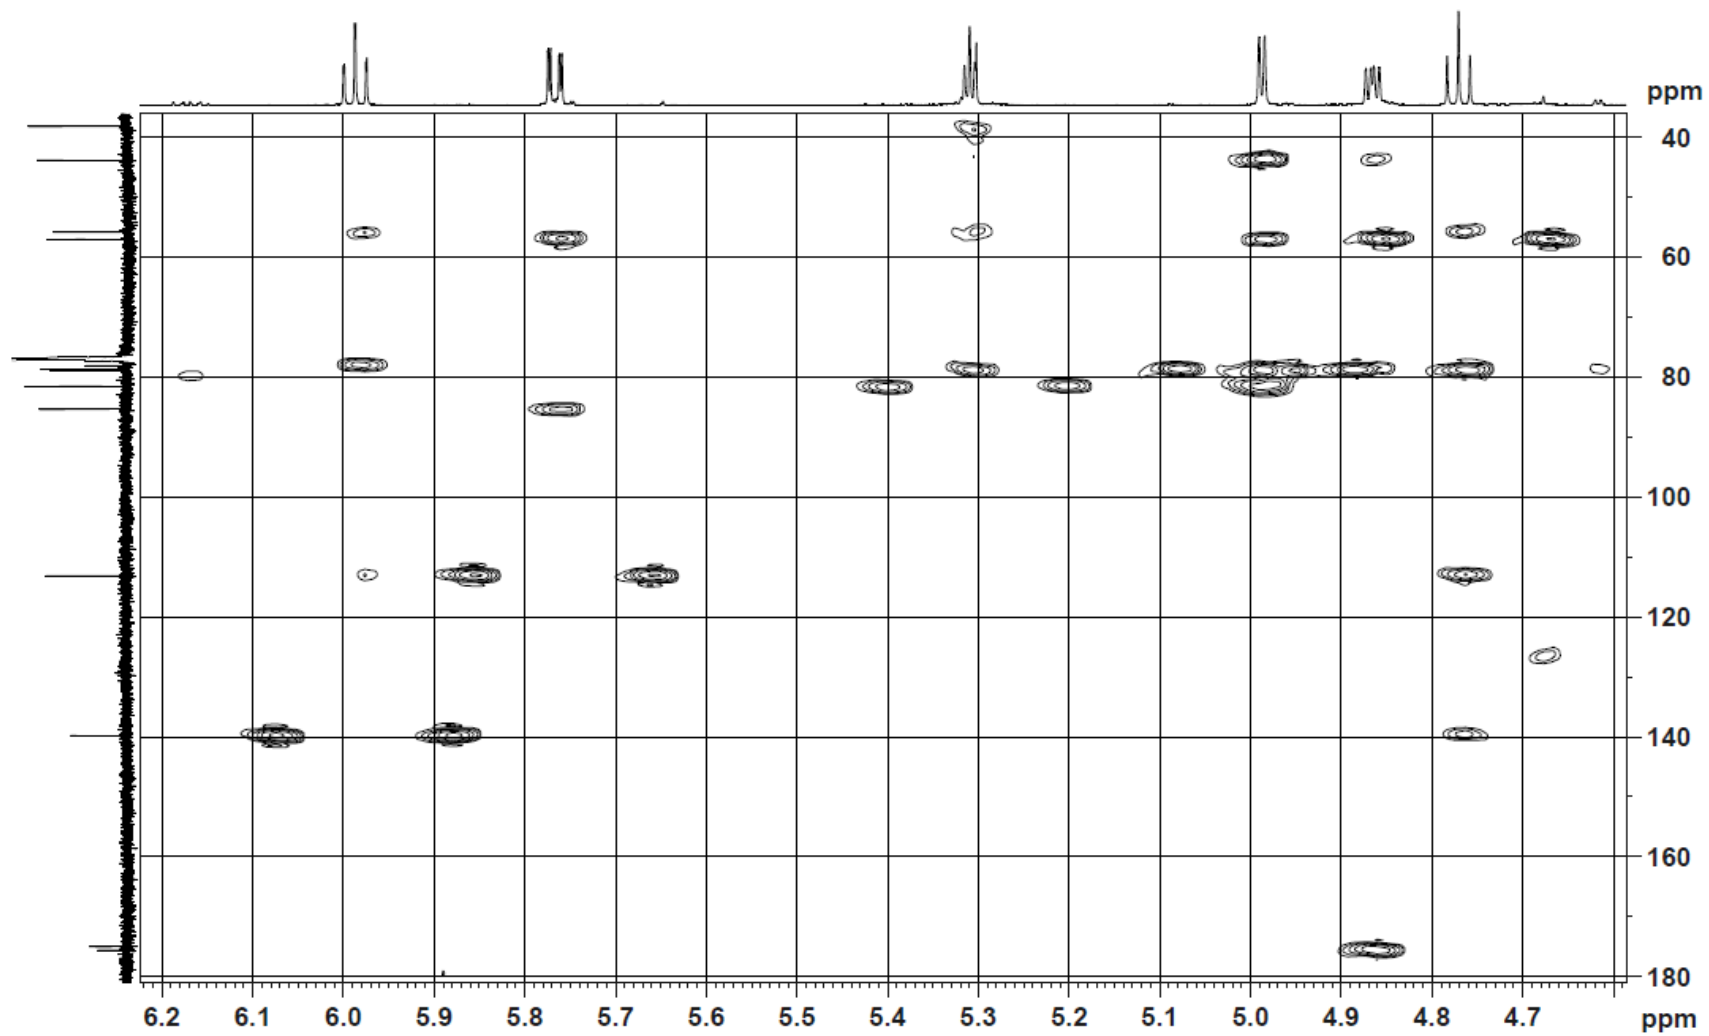

Figure S2j: HMBC NMR of compound 2

Dr. Walied

Sample : NL-229-2 CDCL3



Figure S2k: HMBC NMR of compound 2



Dr. Walied

Sample : NL-229-2

CDCL<sub>3</sub>

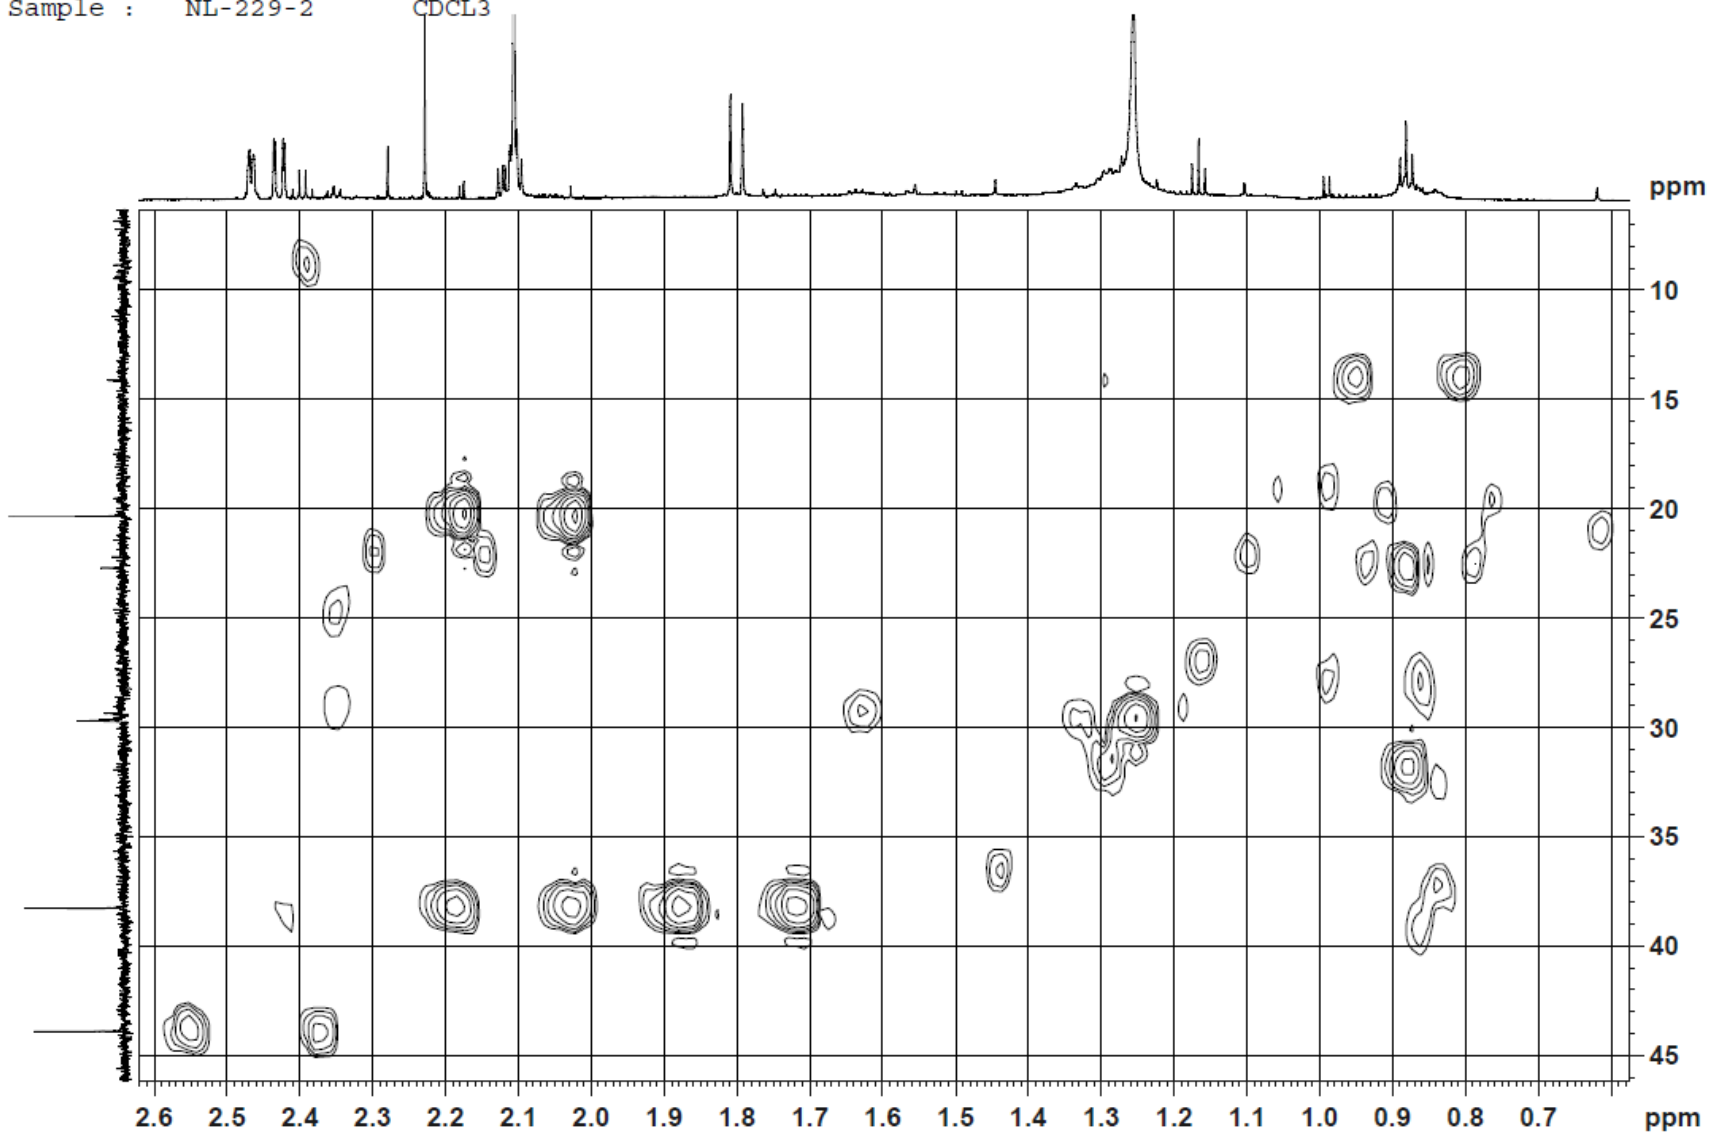

Figure S21: HMBC NMR of compound 2

Dr. Walied  
Sample : NL-229-2 CDCL3

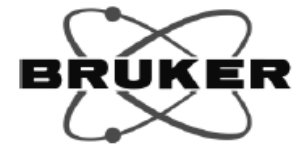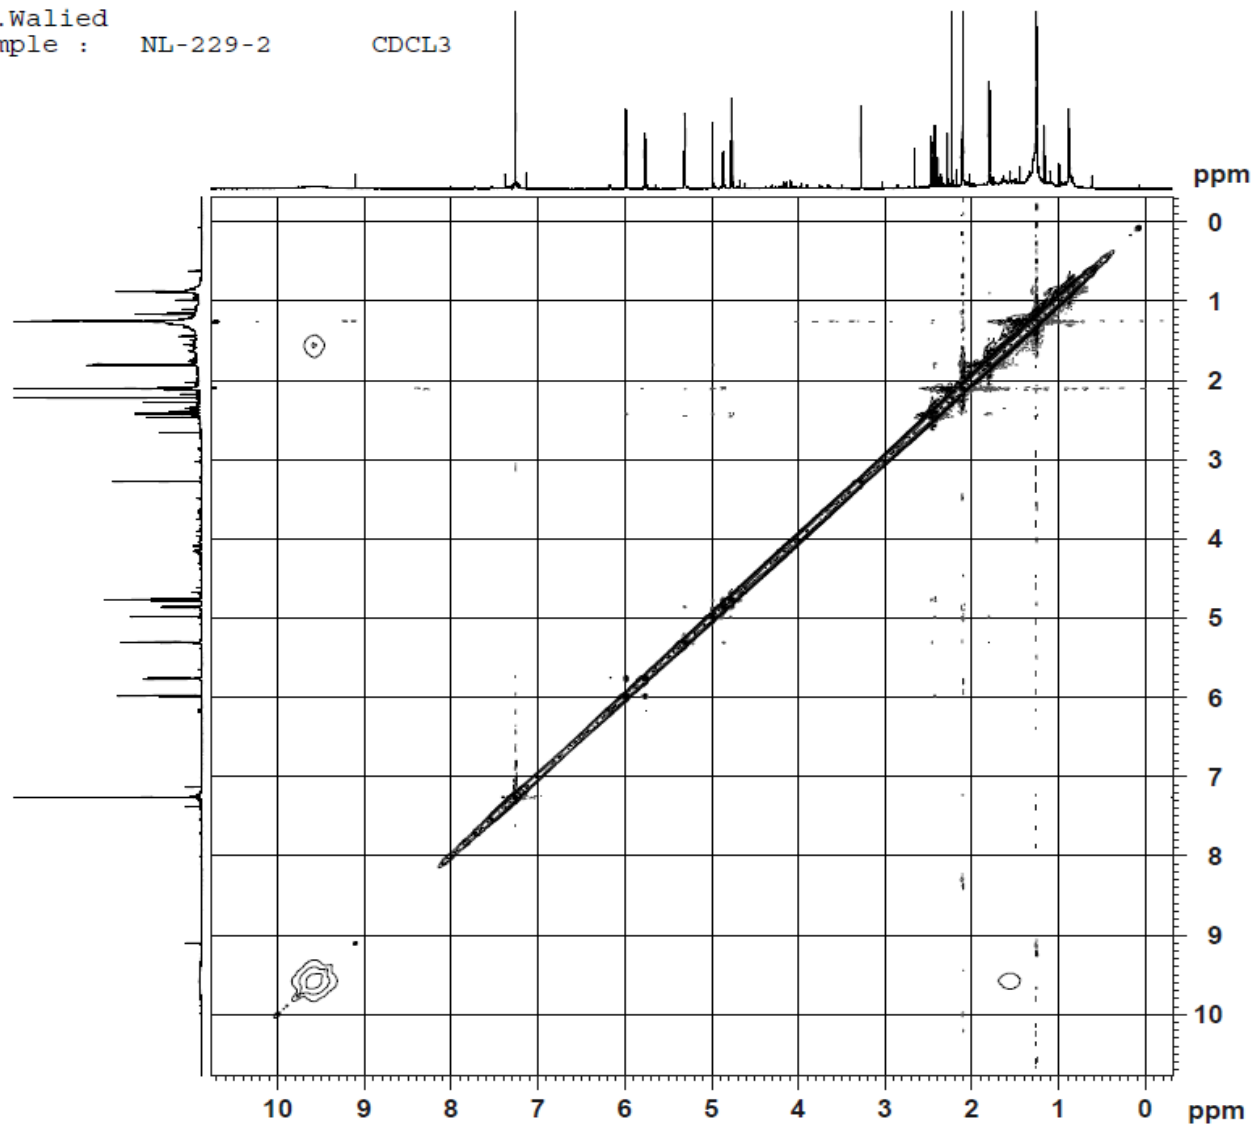

```
Current Data Parameters
NAME      WALIED  NL-2292  23-02-2017
EXPNO     44
PROCNO    1

F2 - Acquisition Parameters
Date_     20170226
Time_     12.32
INSTRUM   spect
PROBHD    5 mm CPQCI 1H-
PULPROG   noesygpphpp
TD         2048
SOLVENT   CDCl3
NS         32
DS         32
SWH        9433.962 Hz
FIDRES     4.606427 Hz
AQ         0.1085440 sec
RG         21.28
DW         53.000 usec
DE         10.00 usec
TE         298.0 K
DO         0.00004281 sec
D1         2.01187801 sec
D8         0.30000001 sec
D11        0.03000000 sec
D12        0.00002000 sec
D16        0.00020000 sec
IN0        0.00010600 sec

----- CHANNEL f1 -----
SFO1      850.1544606 MHz
NUC1      1H
P1         8.00 usec
P2         16.00 usec
P17        2500.00 usec
PLW1      15.30000019 W
PLW10     1.70000005 W

----- GRADIENT CHANNEL -----
GPNAM[1]  SMEQ10.100
GPZ1      40.00 %
P16       1000.00 usec

F1 - Acquisition parameters
TD         256
SFO1      850.1545 MHz
FIDRES     36.951414 Hz
SW         11.097 ppm
FnMODE     States-TPPI

F2 - Processing parameters
SI         1024
SF         850.1500200 MHz
WDW        QSINE
SSB        2
LB         0 Hz
GB         0
PC         1.00

F1 - Processing parameters
SI         1024
MC2        States-TPPI
SF         850.1500200 MHz
WDW        QSINE
SSB        2
LB         0 Hz
GB         0
```

Figure S2l: NOSY NMR of compound 2

Dr.Walied

Sample : NL-244-4 CDCL3

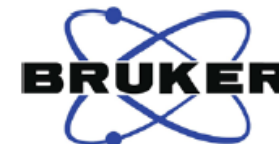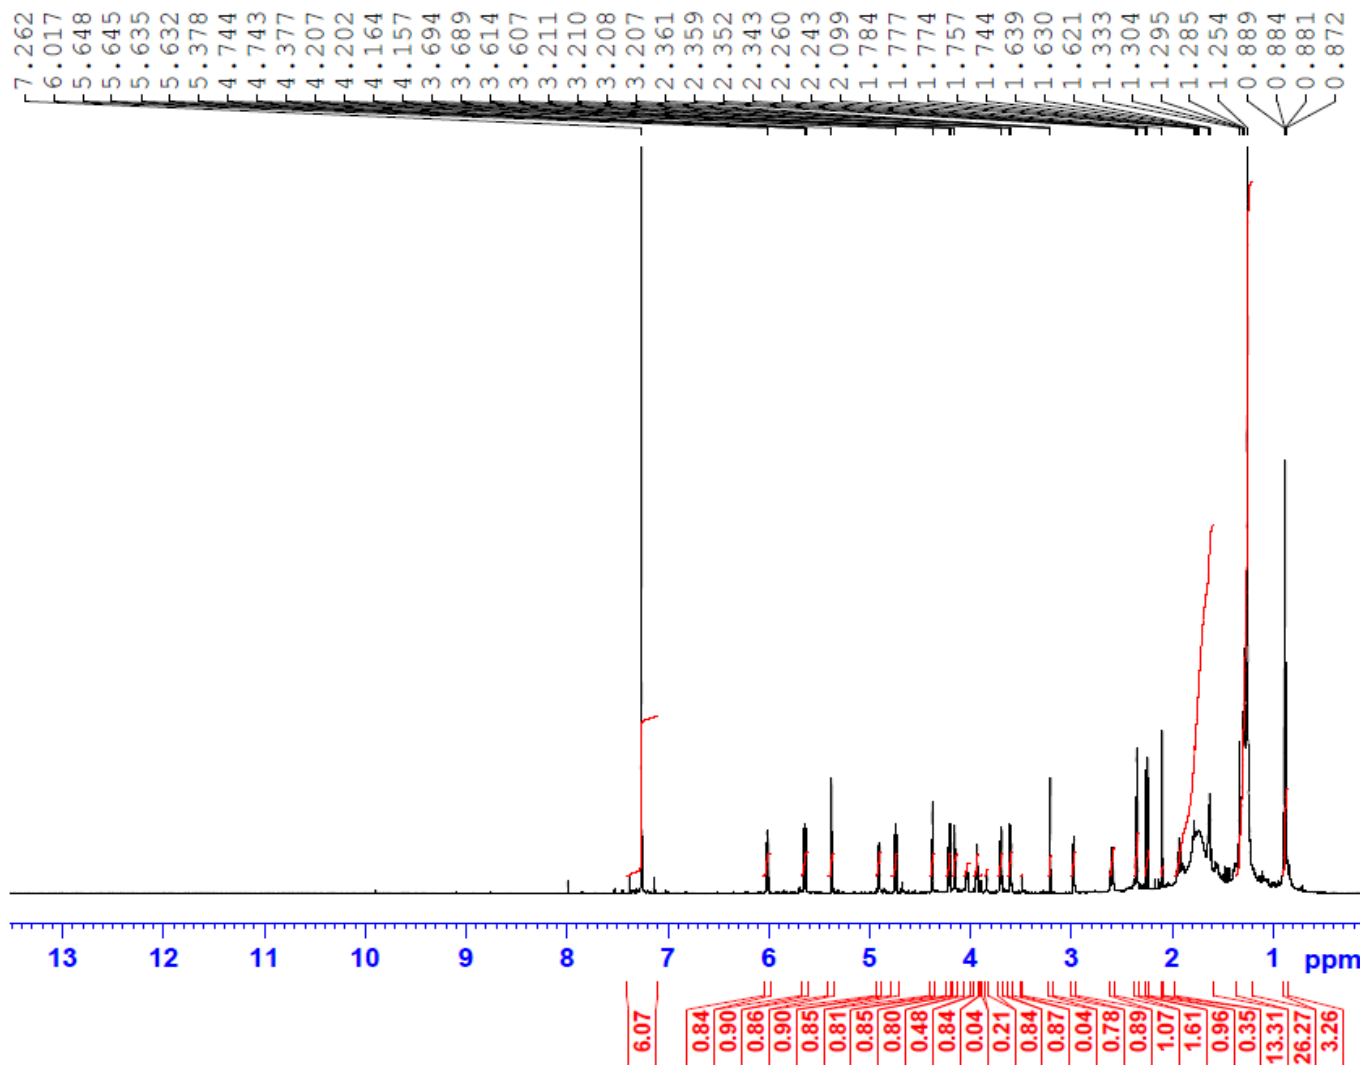

Current Data Parameters  
NAME WALIED NL-244-4 15-03-2017  
EXPNO 40  
PROCNO 1

F2 - Acquisition Parameters  
Date\_ 20170315  
Time 11.27  
INSTRUM spect  
PROBHD 5 mm CPQCI 1H-  
PULPROG zg30  
TD 65536  
SOLVENT CDCL3  
NS 32  
DS 2  
SMH 17006.803 Hz  
FIDRES 0.259503 Hz  
AQ 1.9267584 sec  
RG 10.55  
DW 29.400 usec  
DE 10.00 usec  
TE 298.0 K  
D1 1.00000000 sec  
TDO 1

===== CHANNEL f1 =====  
SFO1 850.1552500 MHz  
NUC1 1H  
P1 8.00 usec  
PLW1 15.30000019 W

F2 - Processing parameters  
SI 65536  
SF 850.1502000 MHz  
WDW EM  
SSB 0  
LB 0.30 Hz  
GB 0  
PC 2.00

Figure S3a: <sup>1</sup>H NMR of compound 3

Dr. Walied  
Sample : NL-244-4 CDCl<sub>3</sub>

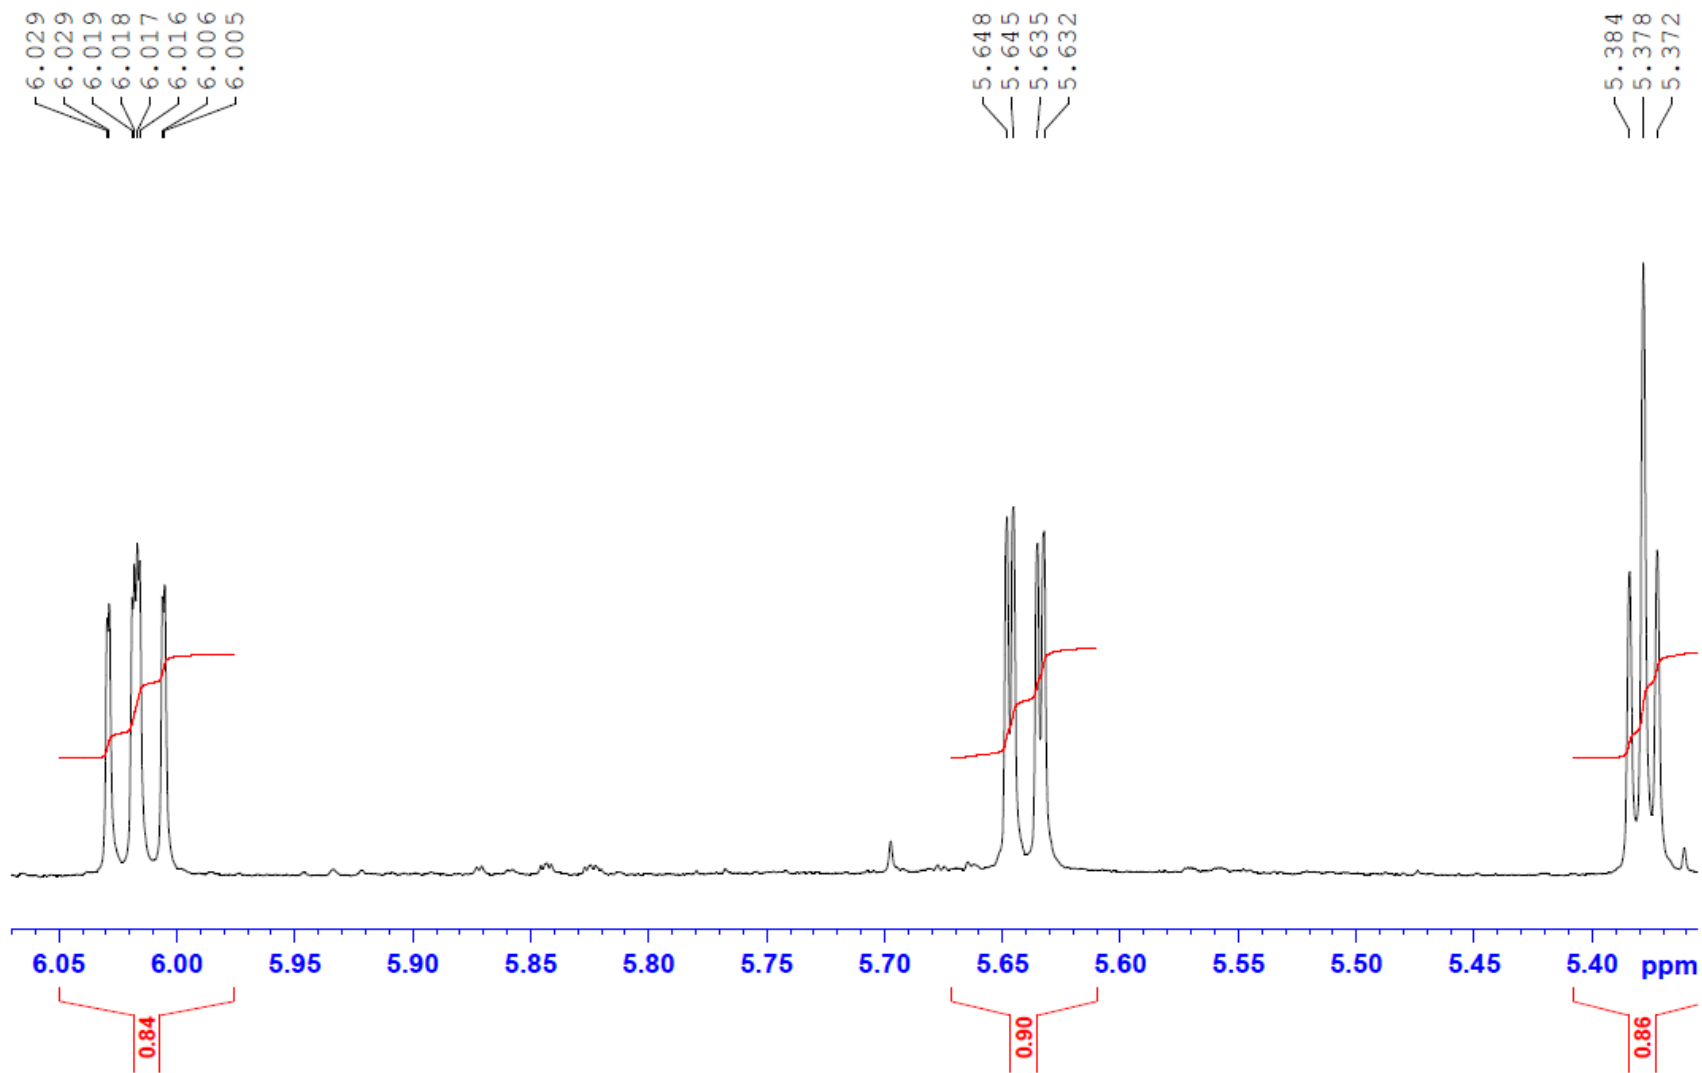

Figure S3b: <sup>1</sup>H NMR of compound 3

Dr. Walied  
Sample : NL-244-4 CDCL3

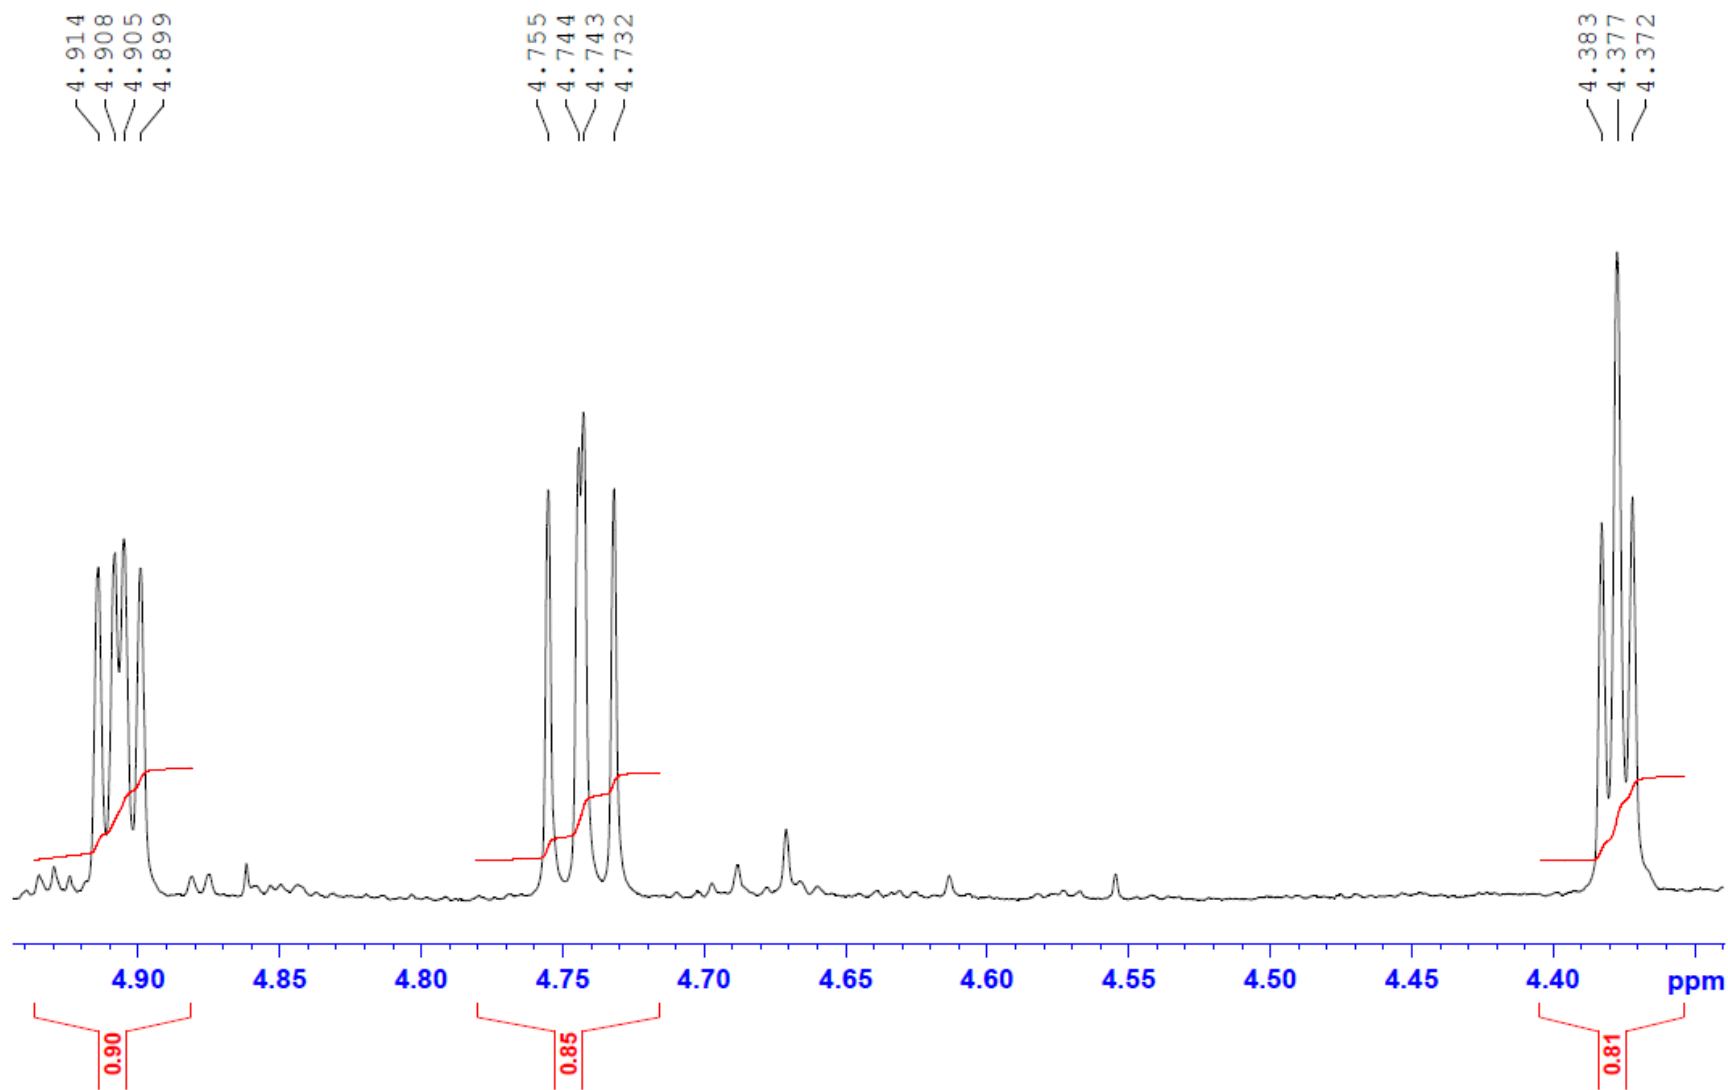

Figure S3c:  $^1\text{H}$  NMR of compound 3

Dr. Walied  
Sample : NL-244-4 CDCL3

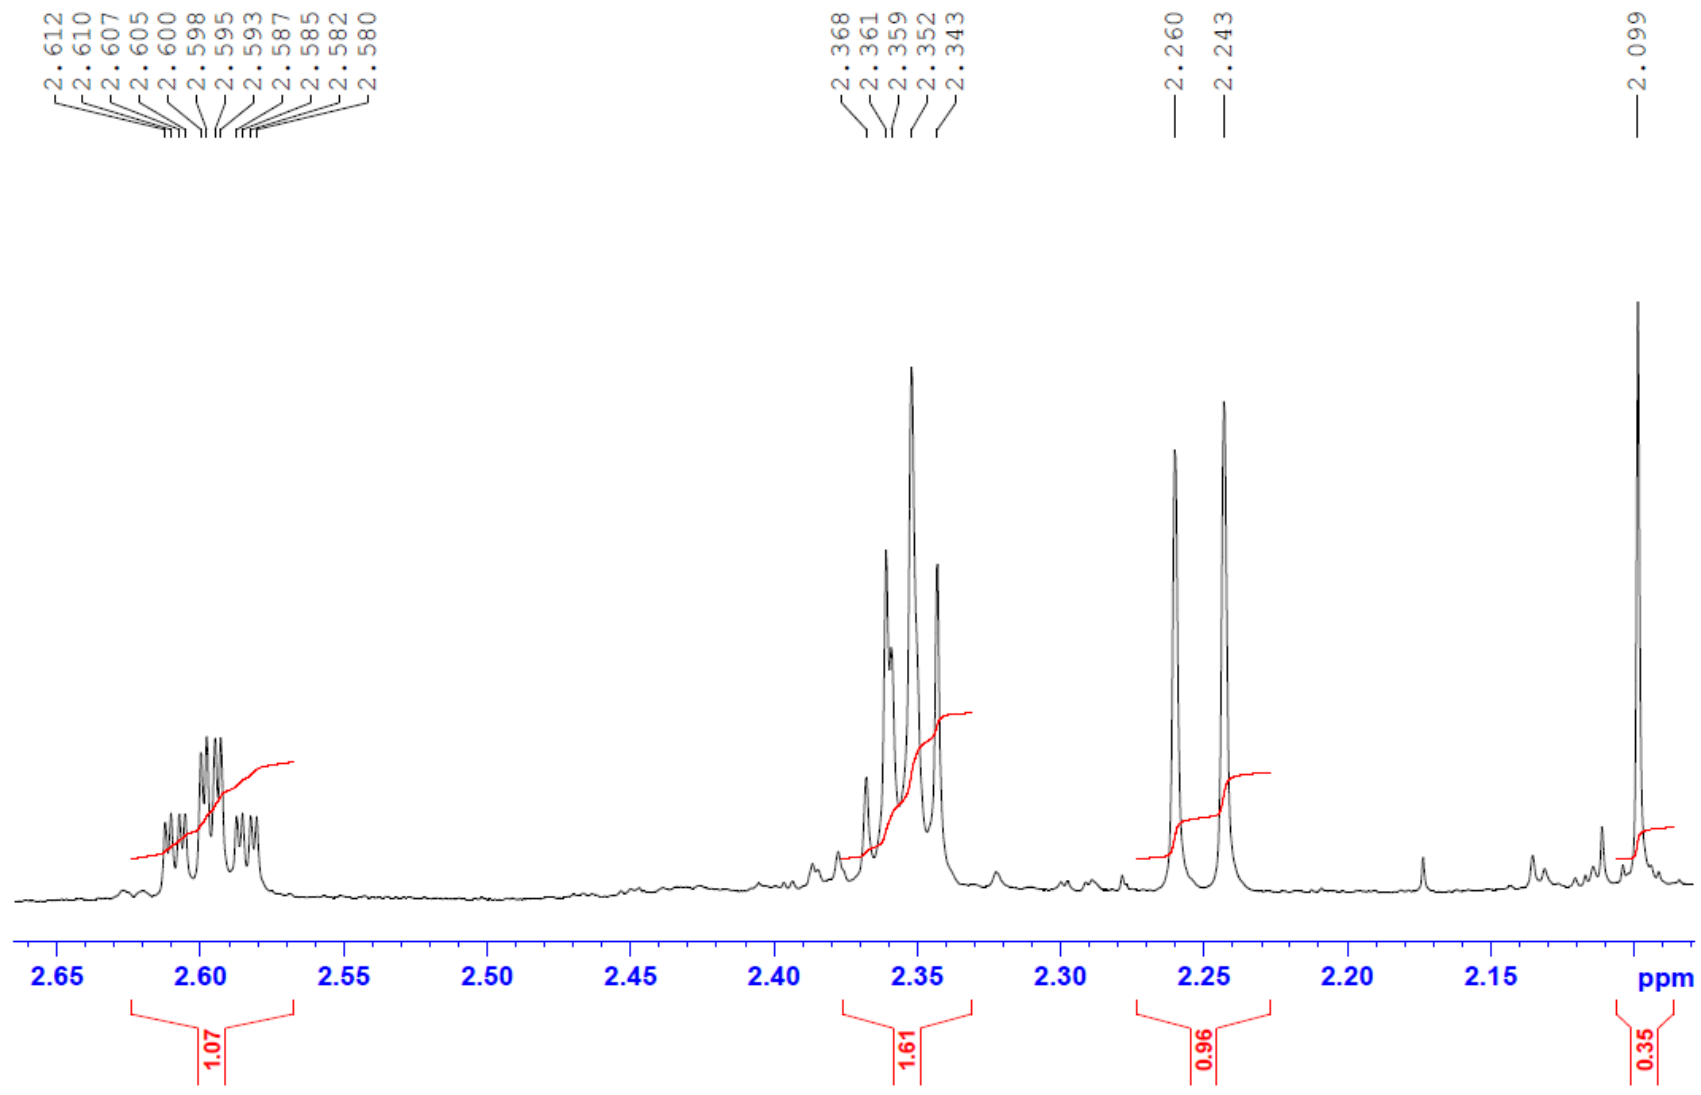

Figure S3d: <sup>1</sup>H NMR of compound 3

Dr.Walied

Sample : NL-244-4

CDCL3

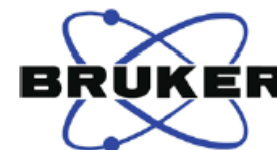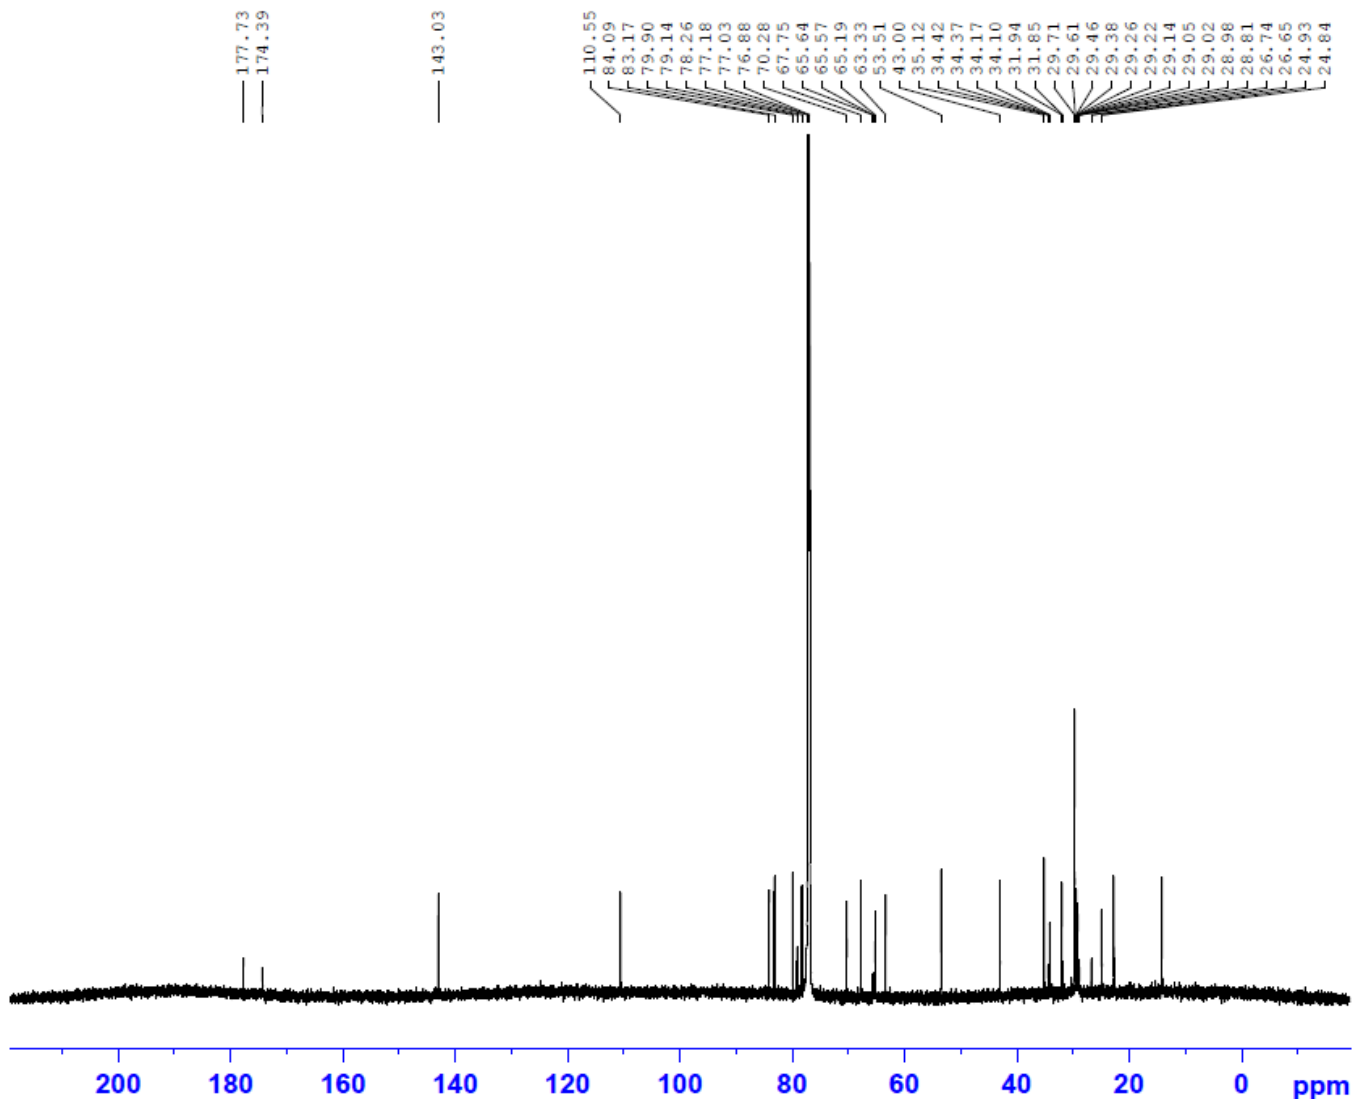

Current Data Parameters  
NAME WALIED NL-244-4 16-08-2017  
EXNO 21  
PROCNO 1

F2 - Acquisition Parameters  
Date\_ 20170317  
Time\_ 20.35  
INSTRUM spect  
PROBHD 5 mm CPQCI 1H-  
PULPROG zgpg30  
TD 65536  
SOLVENT CDCl3  
NS 4096  
DS 4  
SWH 51020.406 Hz  
FIDRES 0.778510 Hz  
AQ 0.6422528 sec  
RG 186.93  
DW 9.800 usec  
DE 18.00 usec  
TE 298.0 K  
D1 2.00000000 sec  
D11 0.03000000 sec  
TD0 1

===== CHANNEL #1 =====  
SFO1 213.7917636 MHz  
NUC1 13C  
P1 12.00 usec  
PLW1 130.00000000 W

===== CHANNEL #2 =====  
SFO2 850.1534006 MHz  
NUC2 1H  
PCPD2 waltz16  
PCPD2 80.00 usec  
PLW2 13.80000019 W  
PLW12 0.13800000 W  
PLW13 0.08892000 W

F2 - Processing parameters  
SI 32768  
SF 213.7703875 MHz  
WDW EM  
SSB 0  
LB 1.50 Hz  
GB 0  
FC 2.00

Figure S3e: <sup>13</sup>C NMR of compound 3

Dr. Walled  
Sample : NL-244-4 CDCL3

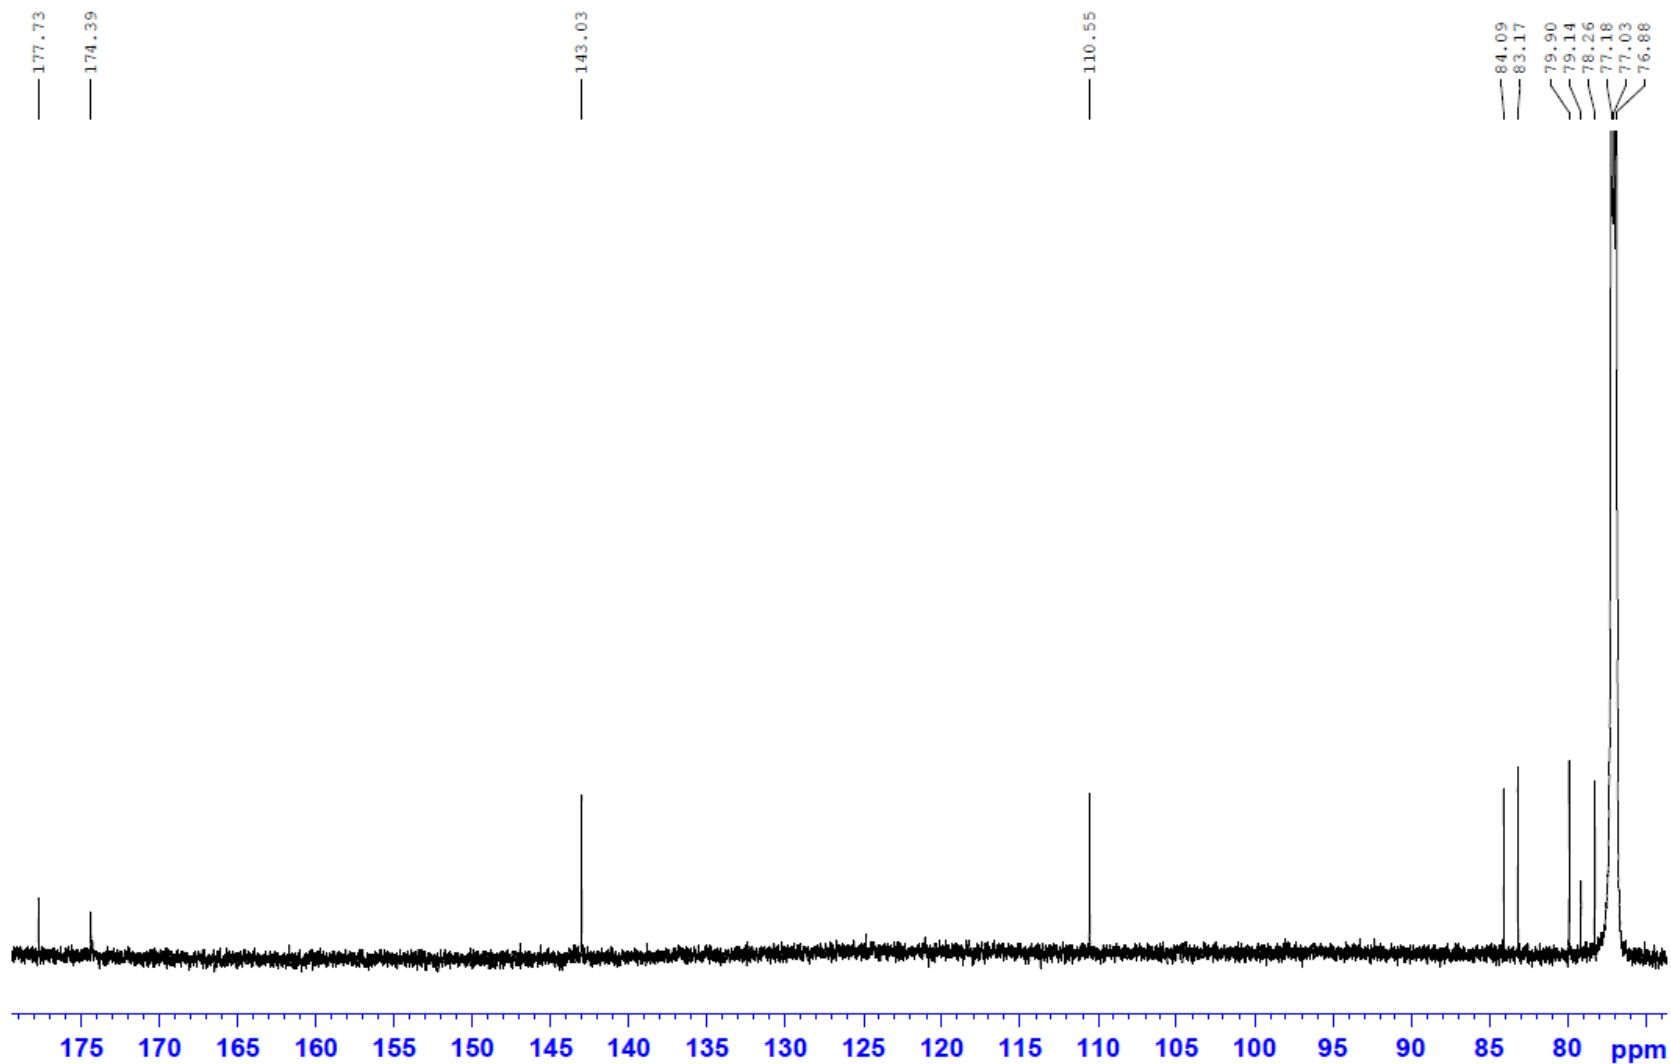

Figure S3f:  $^{13}\text{C}$  NMR of compound 3



Dr. Walied

Sample : NL-244-4 CDCL3

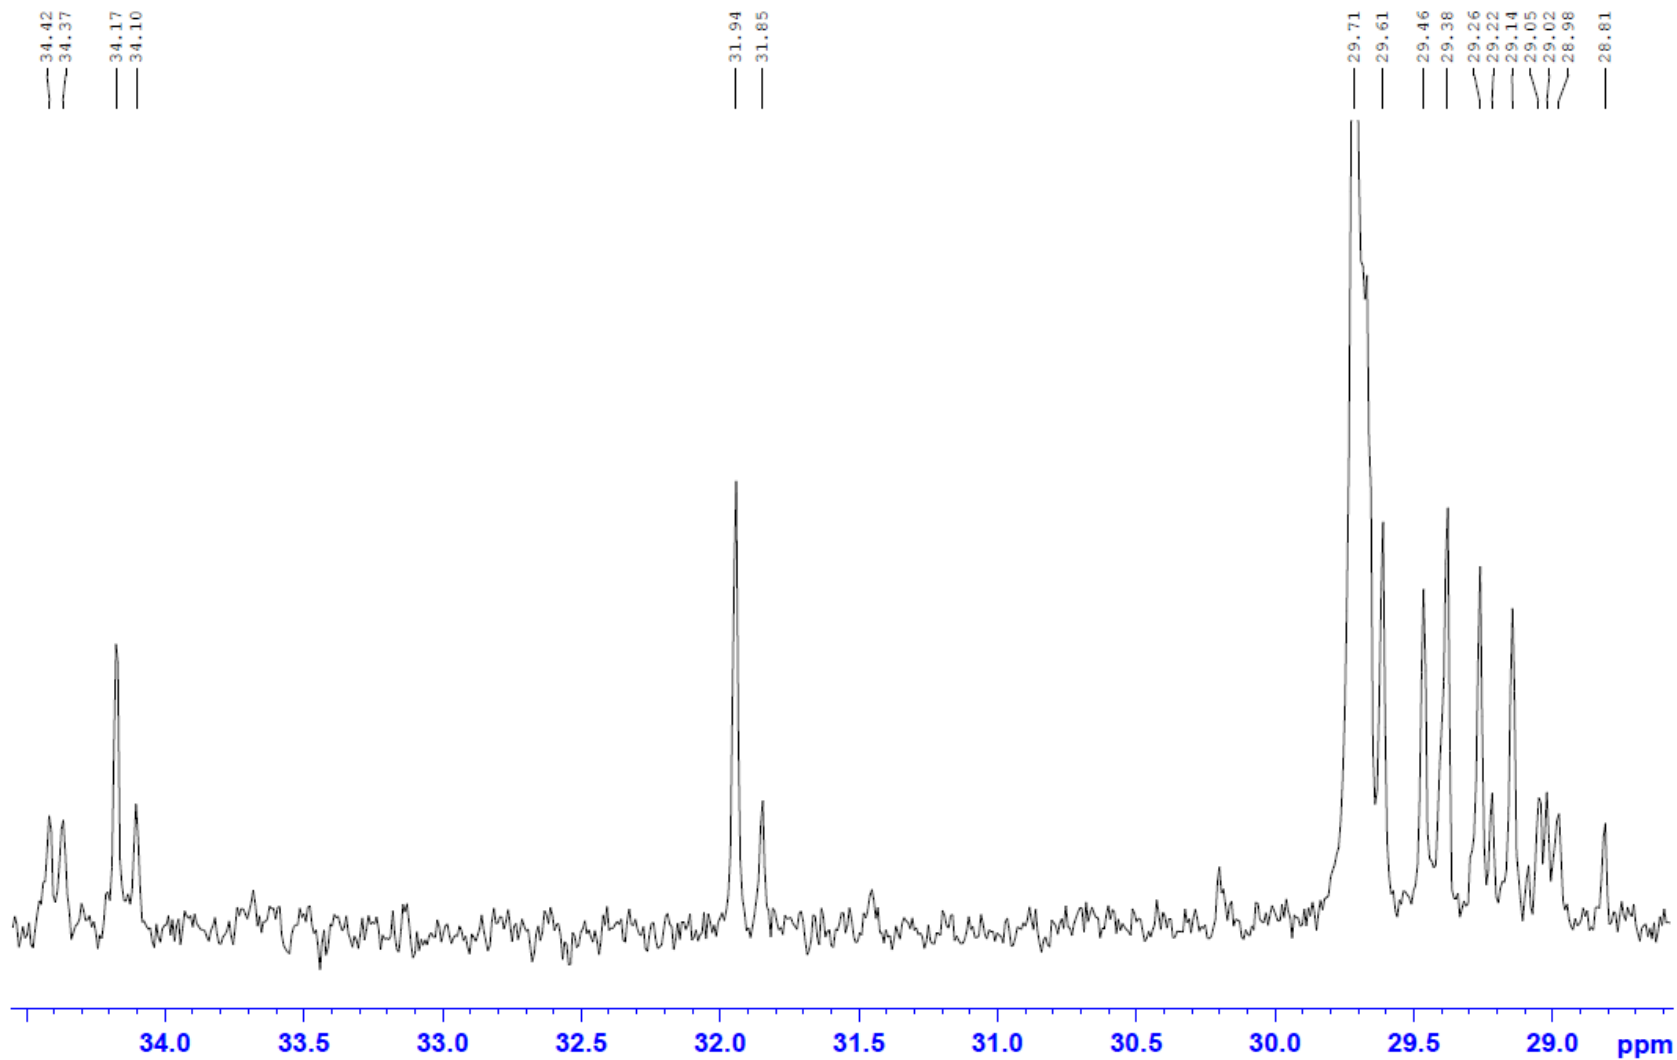

Figure S3g: <sup>13</sup>C NMR of compound 3

Dr.Walied  
Sample : NL-244-4 CDCL3

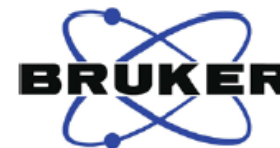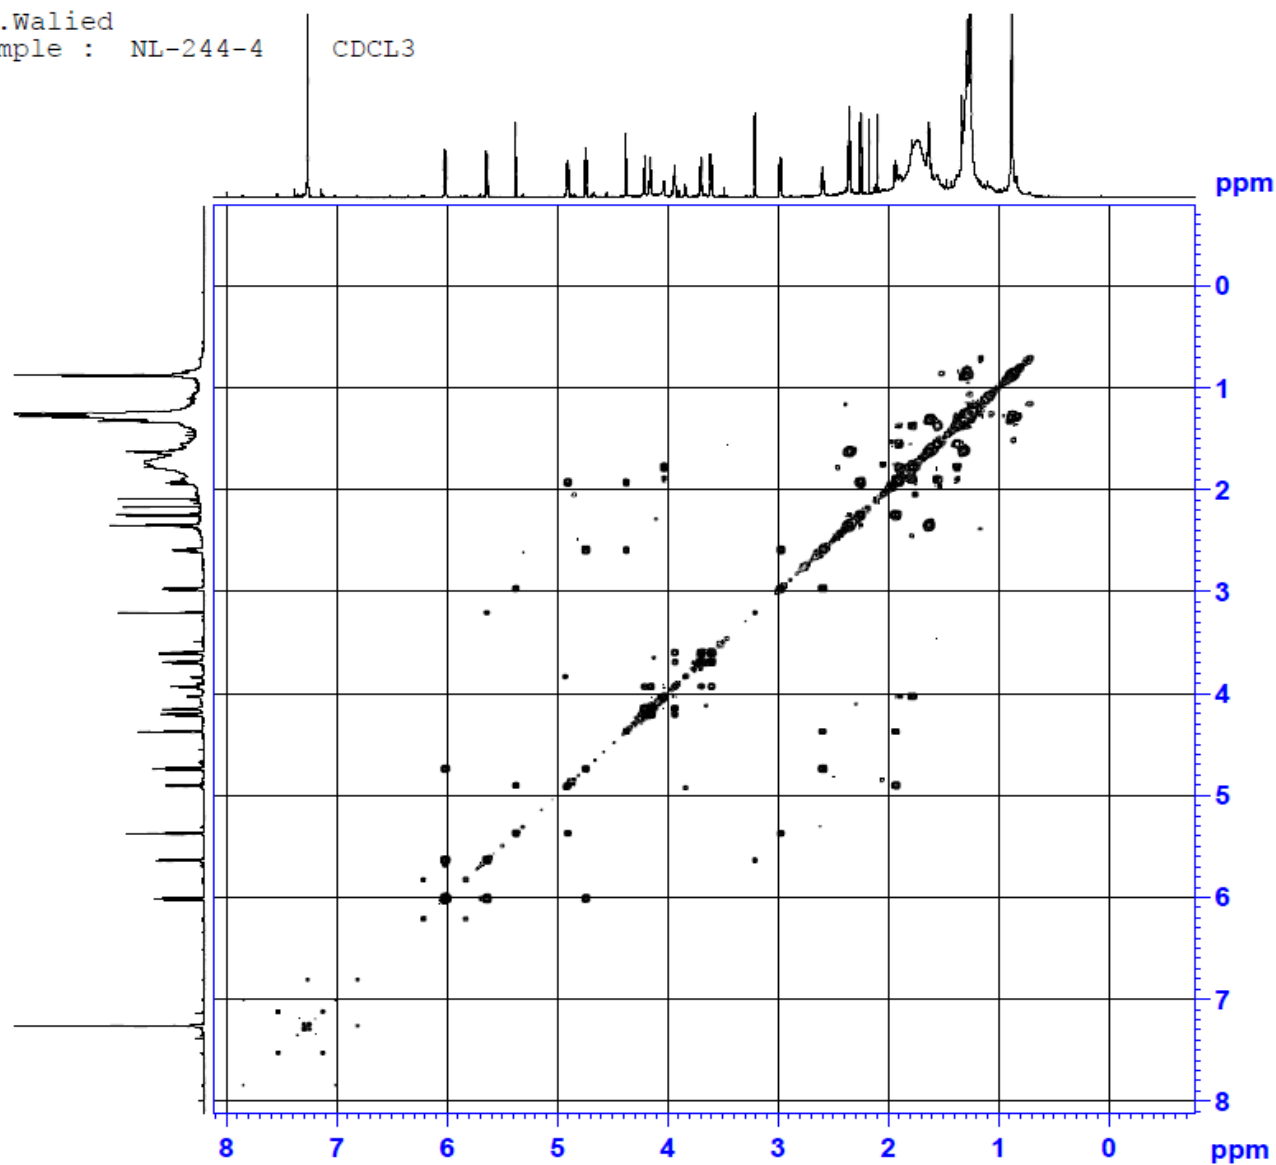

Current Data Parameters  
NAME WALIED NL-244-4 21-02-2017  
EXPNO 11  
PROCNO 1

F2 - Acquisition Parameters  
Date\_ 20170221  
Time 14.57  
INSTRUM spect  
PROBHD 5 mm CPQCI 1H-  
PULPROG cosygpmfcr  
TD 2048  
SOLVENT CDCL3  
NS 16  
DS 8  
SWH 7575.758 Hz  
FIDRES 3.699100 Hz  
AQ 0.1351680 sec  
RG 126.92  
DW 66.000 usec  
DE 10.00 usec  
TE 298.0 K  
D0 0.00000200 sec  
D1 1.95494401 sec  
D13 0.00000400 sec  
D16 0.00020000 sec  
INO 0.00013200 sec

===== CHANNEL f1 =====  
SF01 850.1331342 MHz  
NUCL1 1H  
P1 8.00 usec  
PLW1 15.30000019 W

===== GRADIENT CHANNEL =====  
GPNAM[1] SMSQ10.100  
GPNAM[2] SMSQ10.100  
GPNAM[3] SMSQ10.100  
GP21 16.00 %  
GP22 12.00 %  
GP23 40.00 %  
P16 1000.00 usec

F1 - Acquisition parameters  
TD 128  
SF01 850.1331 MHz  
FIDRES 59.185608 Hz  
SF 8.911 ppm  
PRMODE QF

F2 - Processing parameters  
SI 1024  
SF 850.1500200 MHz  
WDW SINE  
SSB 0  
LB 0 Hz  
GB 0  
PC 1.40

F1 - Processing parameters  
SI 1024  
MC2 QF  
SF 850.1500200 MHz  
WDW SINE  
SSB 0  
LB 0 Hz  
GB 0

Figure S3h: COSY NMR of compound 3

Dr. Walied  
Sample : NL-244-4 CDCL3

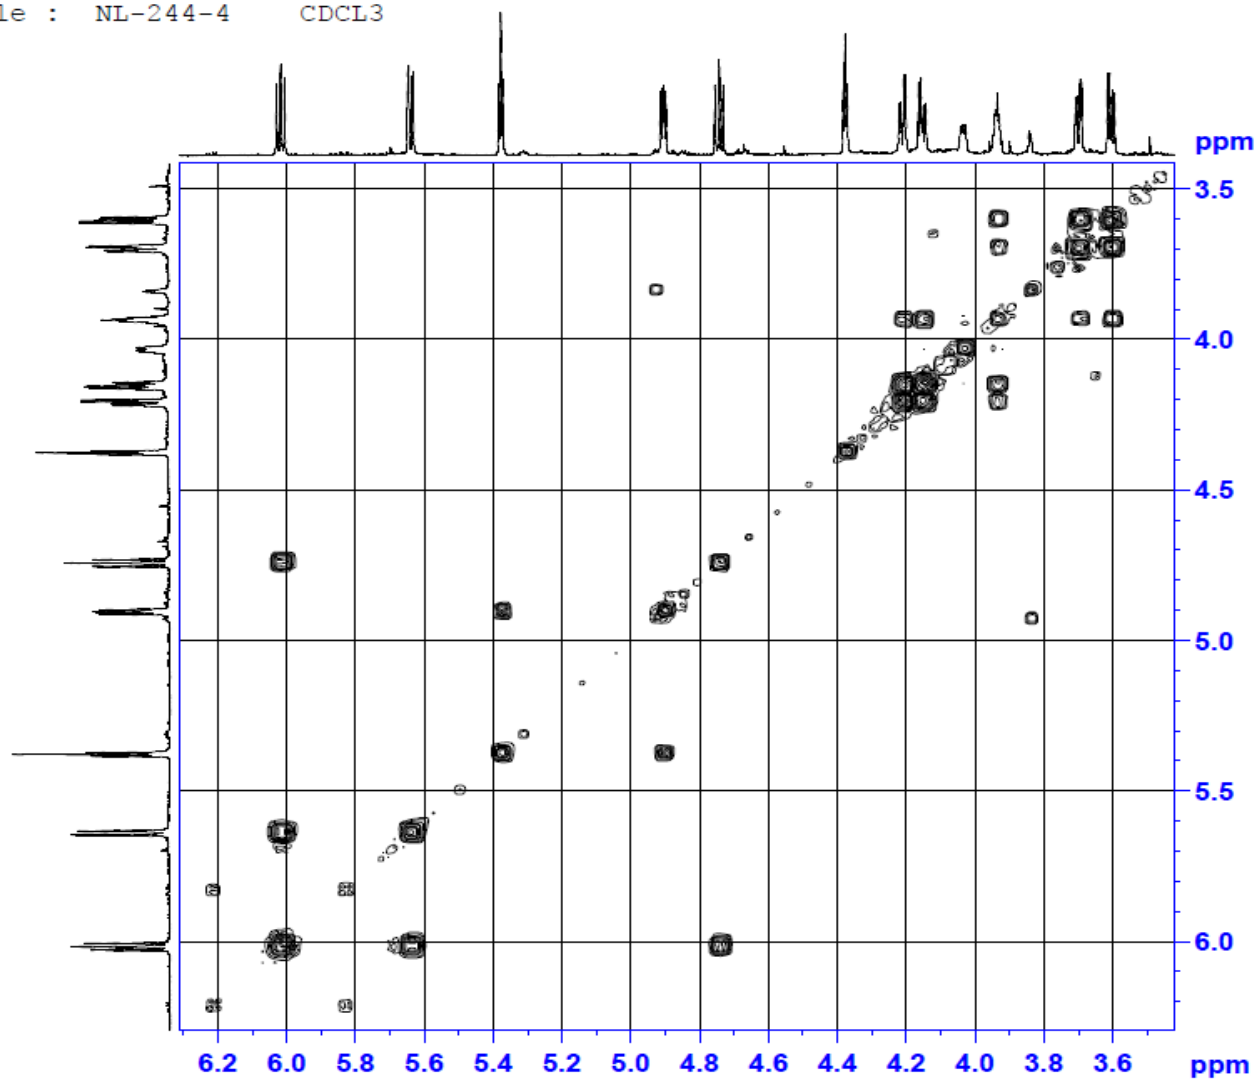

Figure S3i: COSY NMR of compound 3

Dr. Walied  
Sample : NL-244-4 CDCL3

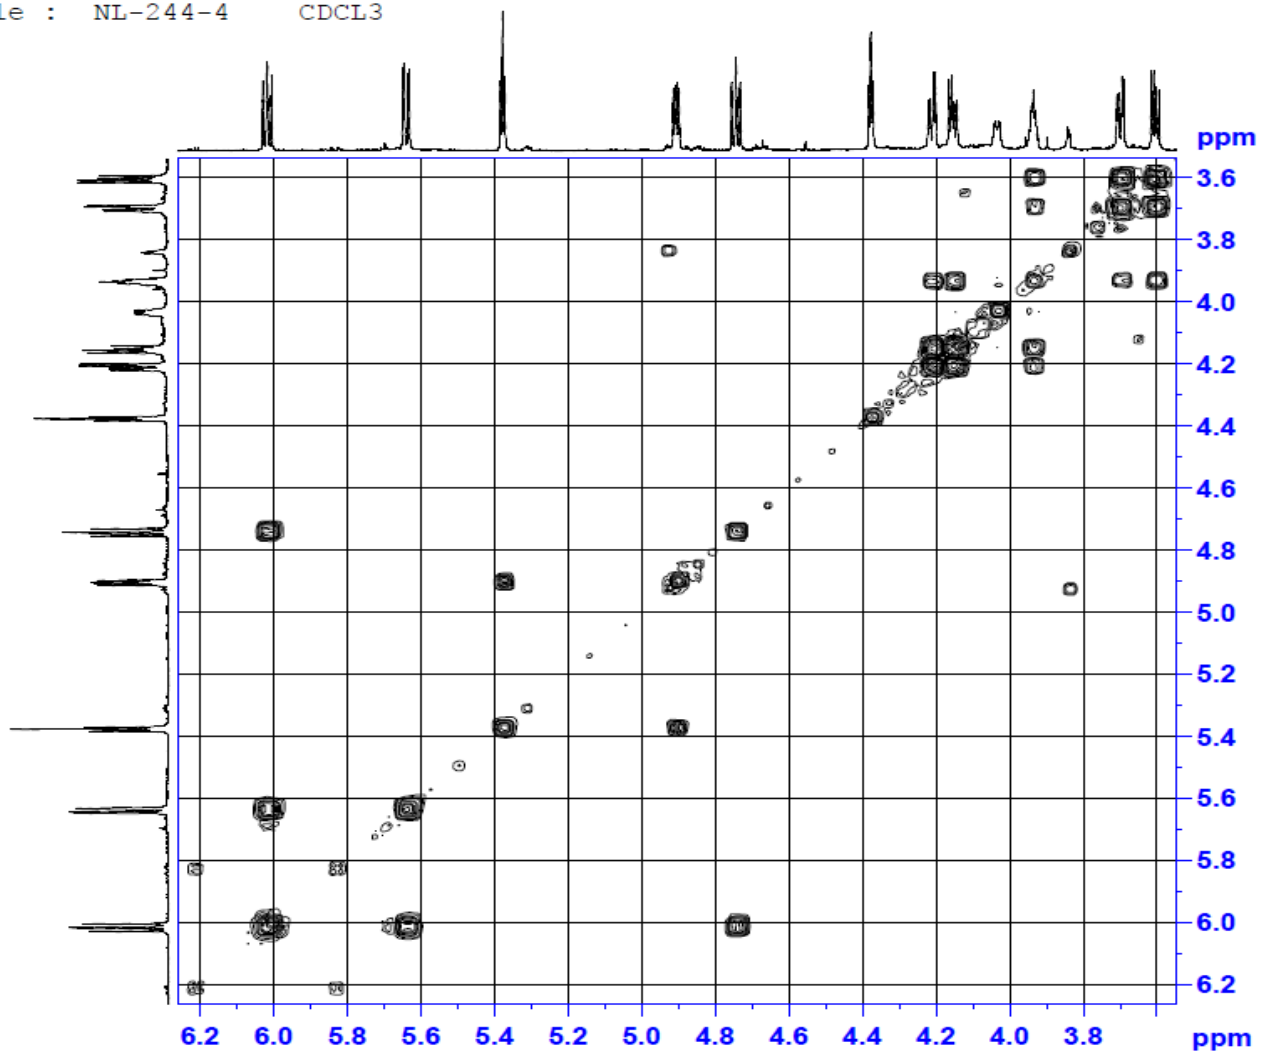

Figure S3j: COSY NMR of compound 3

Dr. Walied  
Sample : NL-244-4 CDCL3

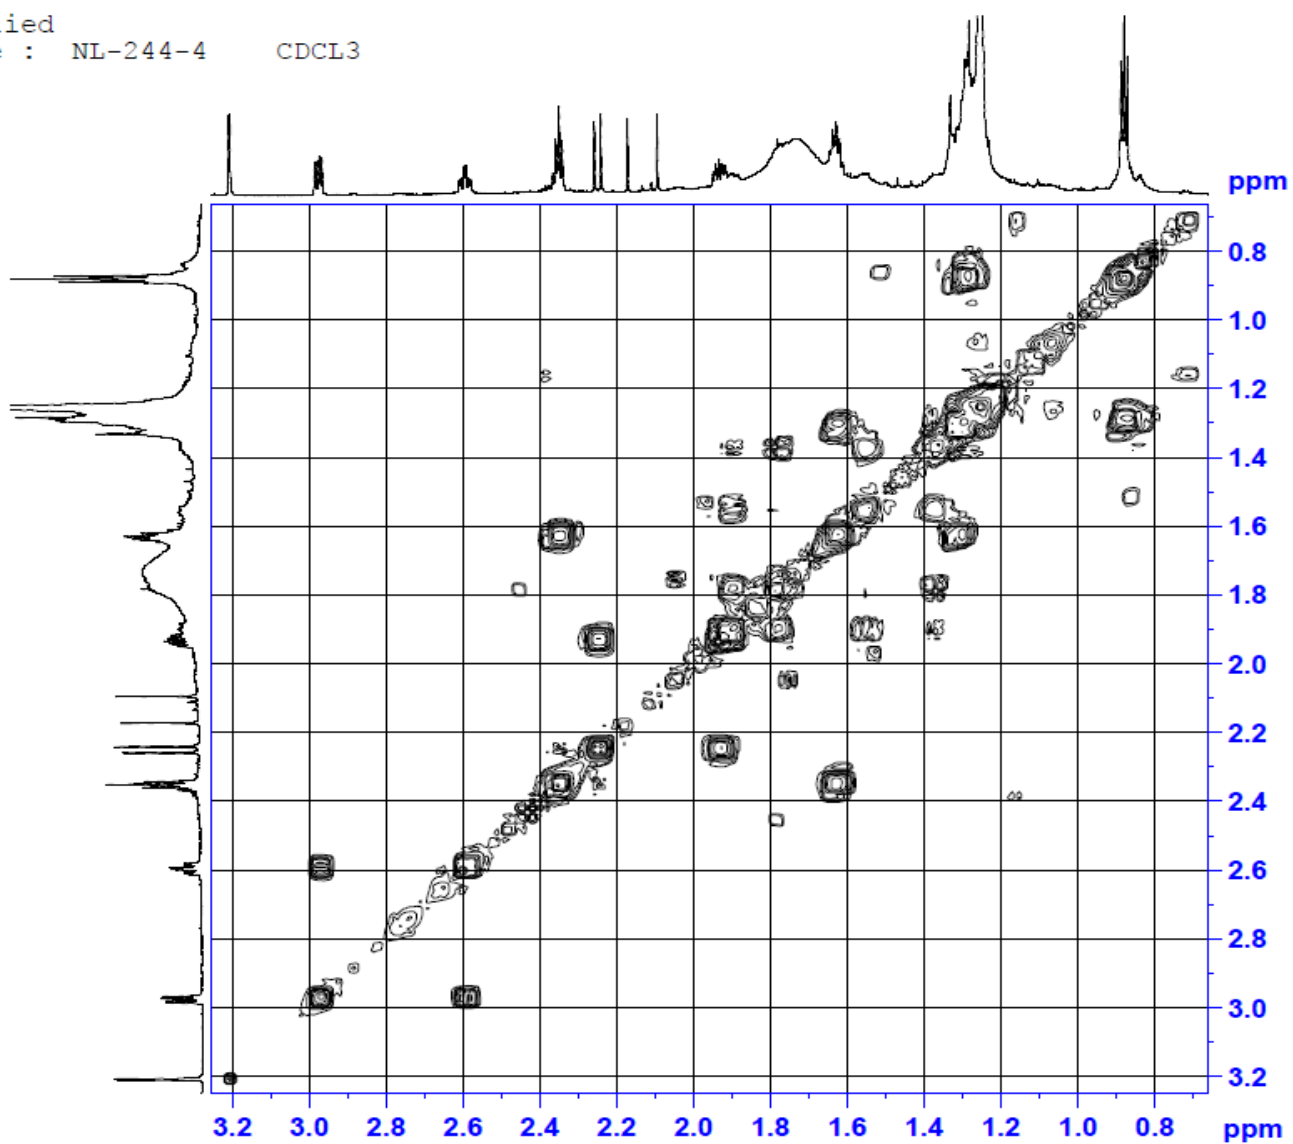

Figure S3k: COSY NMR of compound 3

Dr. Walied  
Sample : NL-244-4 CDCL3

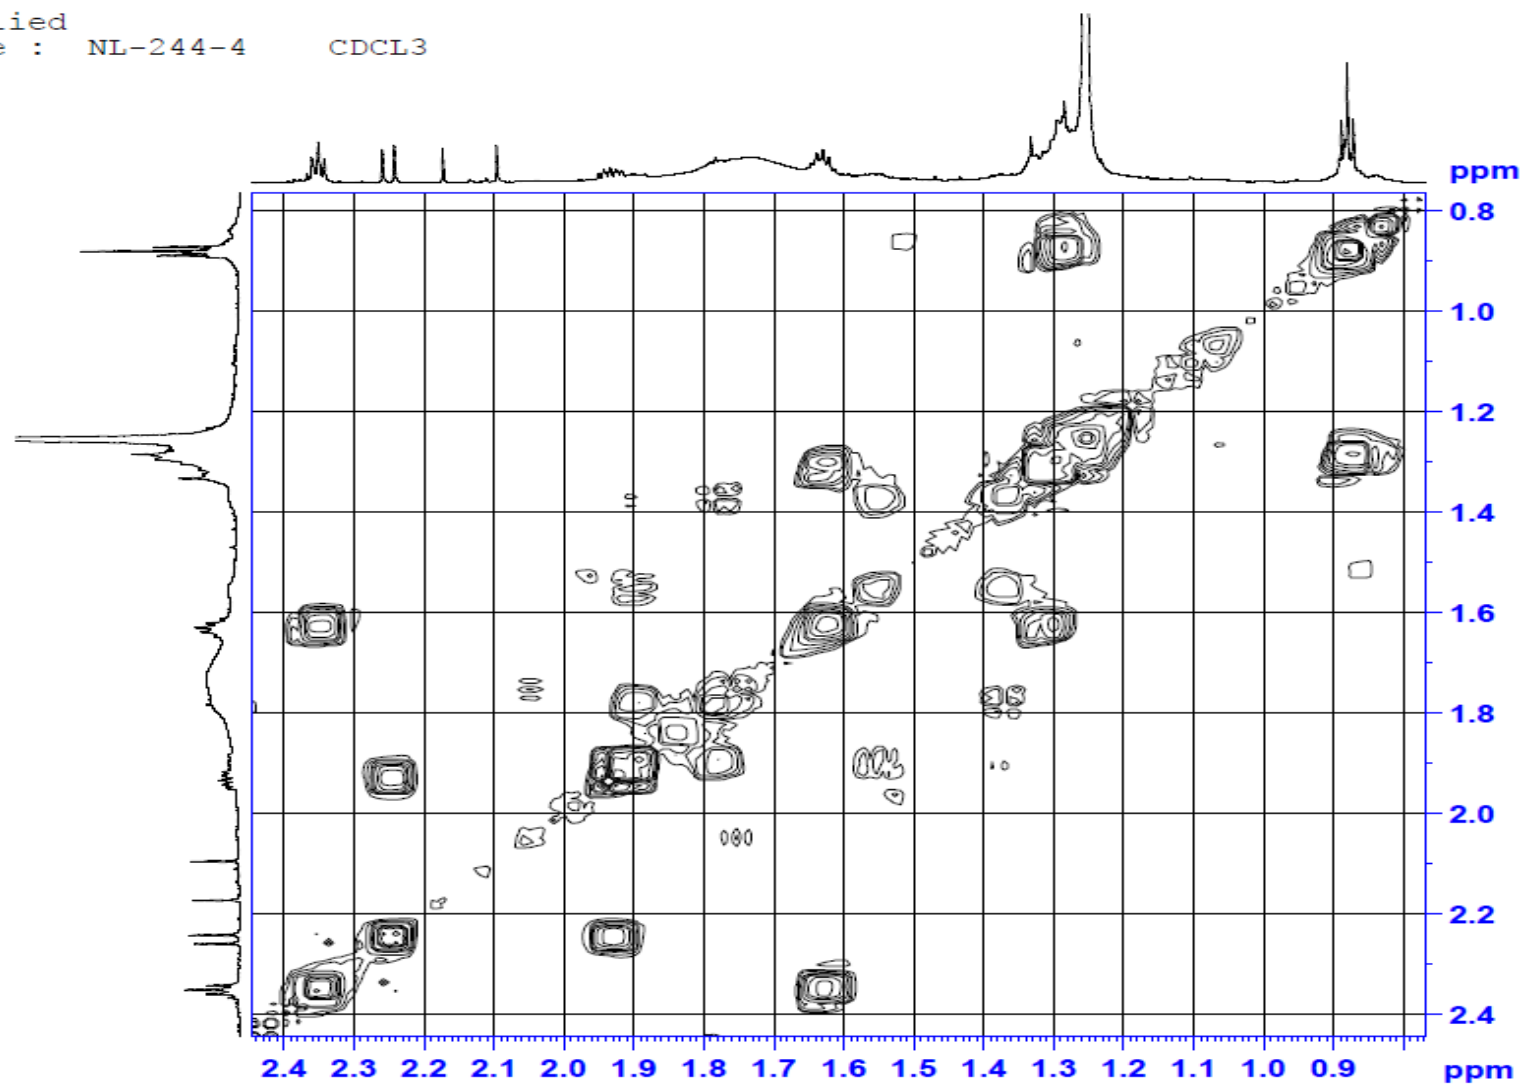

Figure S31: COSY NMR of compound 3

Dr. Walied

Sample : NL-244-4 CDCL3

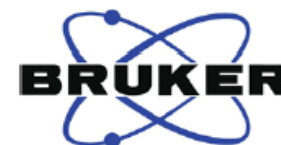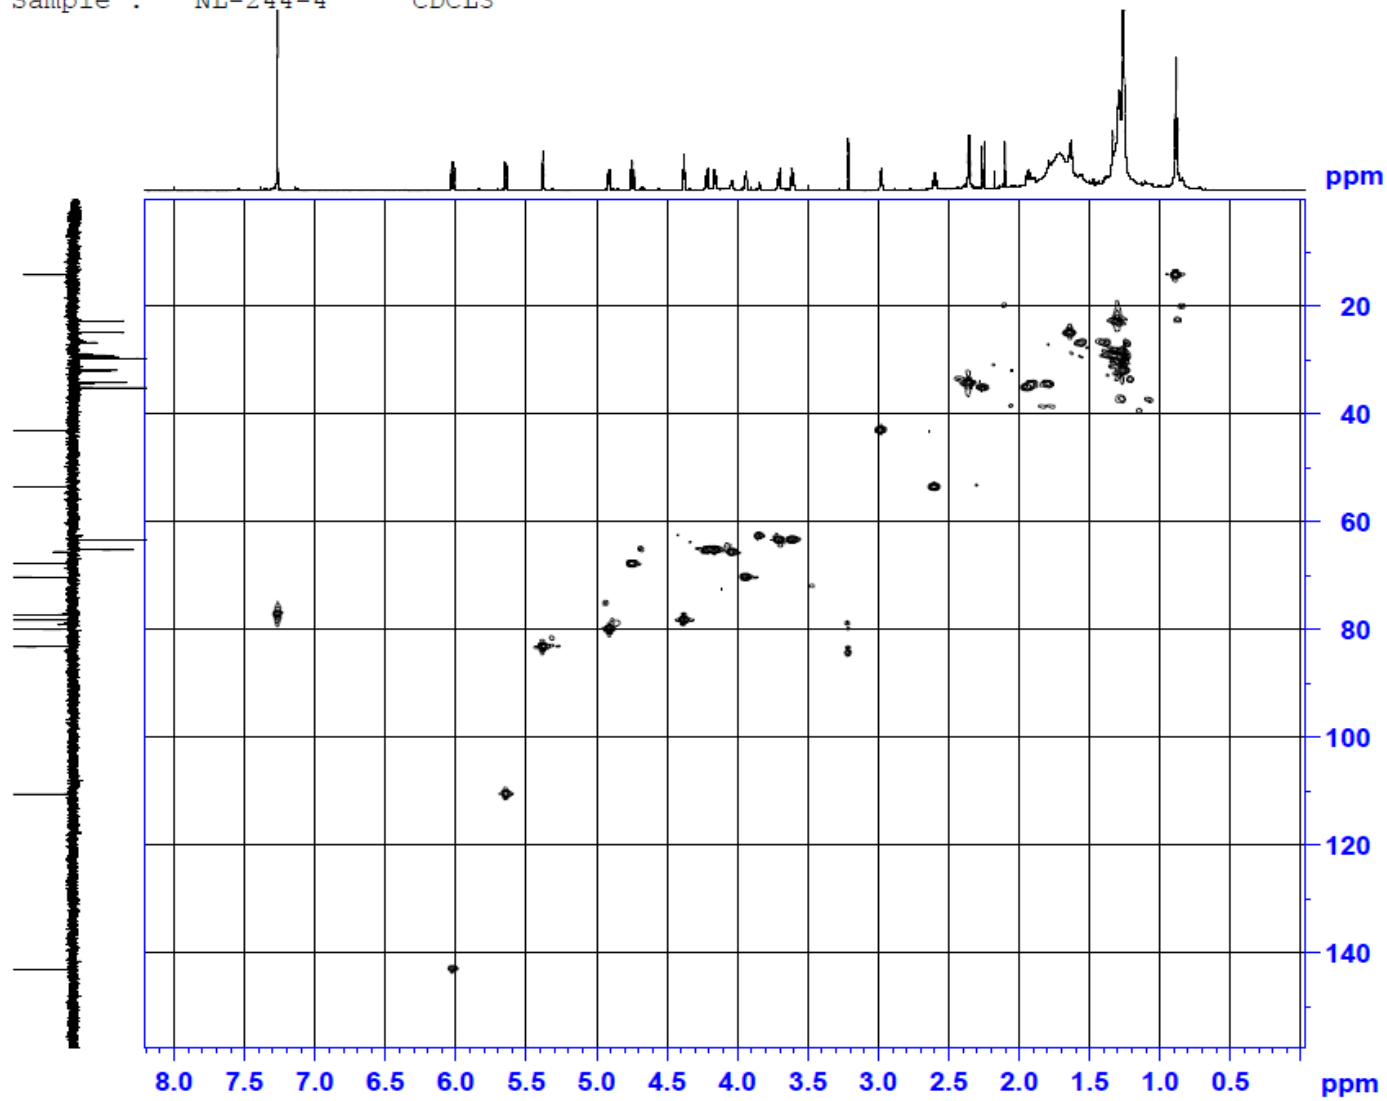

```
Current Data Parameters
NAME      WALIED  NL-244-4   16-03-2017
EXPNO    24
PROCNO   1

F2 - Acquisition Parameters
Date_    20170318
Time     3.10
INSTRUM  spect
PROBHD   5 mm CPQCI 1H-
PULPROG  hsqcetdtp
TD        1024
SOLVENT  CDCL3
NS        32
DS        16
SWH       8064.516 Hz
FIDRES   7.875504 Hz
AQ        0.0634860 sec
RG        186.93
LW        62.000 usec
DE        10.00 usec
TE        298.0 K
CHST2    145.0000000
DO        0.0000300 sec
D1        1.48293304 sec
D4        0.00172414 sec
D11       0.03000000 sec
D13       0.00000400 sec
D16       0.00020000 sec
D21       0.00345000 sec
TM0       0.00001410 sec
ZGPGTNS

----- CHANNEL f1 -----
SFO1     850.1529628 MHz
NUC1      1H
P1        8.00 usec
P2        16.00 usec
P2S       0 usec
PLW1     15.30000019 W

----- CHANNEL f2 -----
SFO2     213.7863316 MHz
NUC2      13C
CPDPRG2  garp
P3        12.00 usec
P4        24.00 usec
PCPD2    45.00 usec
PLW2     130.00000000 W
PLW12    9.24440002 W

----- GRADIENT CHANNEL -----
GPMAM[1] SMSQ10.100
GPMAM[2] SMSQ10.100
GPP1     80.00 %
GPP2     20.10 %
P16      1000.00 usec

F1 - Acquisition parameters
TD        256
SFO1     213.7863 MHz
FIDRES   138.519501 Hz
SW        165.871 ppm
FMODE    Echo-Antiecho

F2 - Processing parameters
SI        1024
SF        850.1500200 MHz
WDW       QSINE
SSB       2
LB        0 Hz
GB        0
PC        1.40

F1 - Processing parameters
SI        1024
WC2      echo-antiecho
SF        213.7703875 MHz
WDW       QSINE
SSB       2
LB        0 Hz
GB        0
```

Figure S3m: HSQC NMR of compound 3

Dr. Walied

Sample : NL-244-4

CDCL<sub>3</sub>

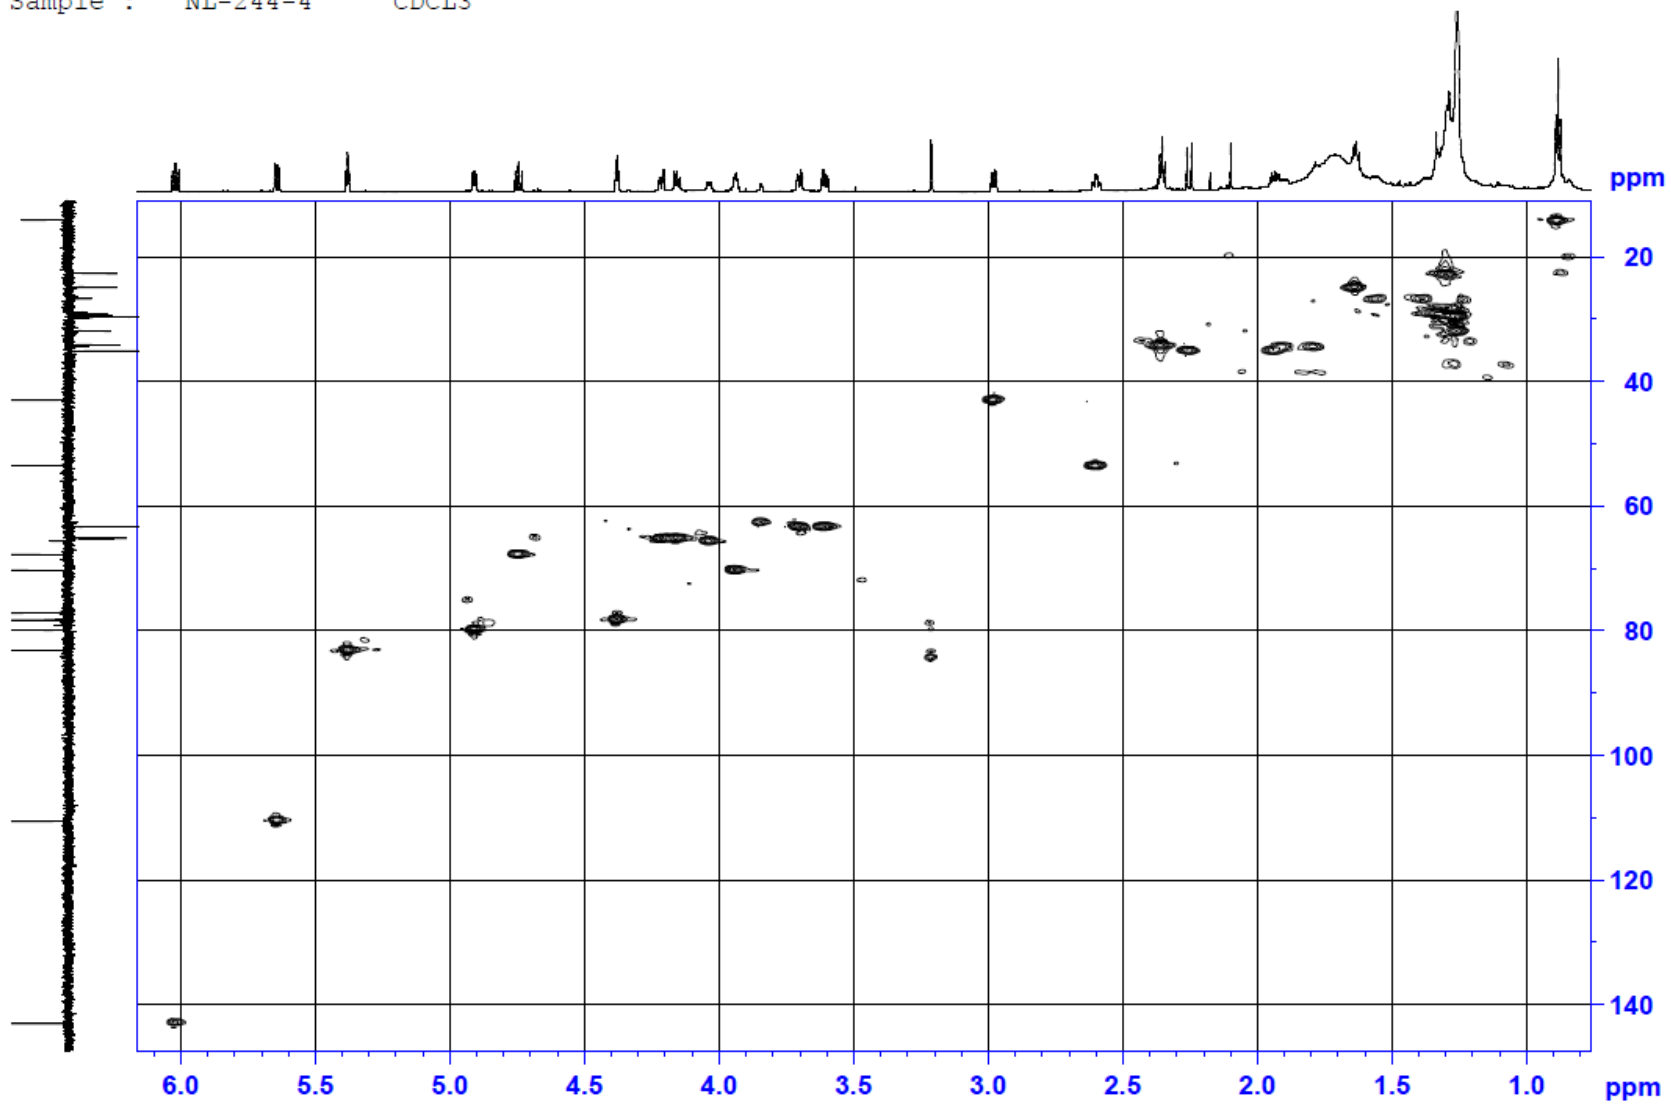

Figure S3n: HSQC NMR of compound 3



Dr. Walied  
Sample : NL-244-4 CDCL3

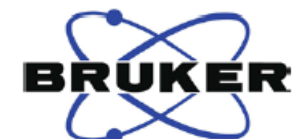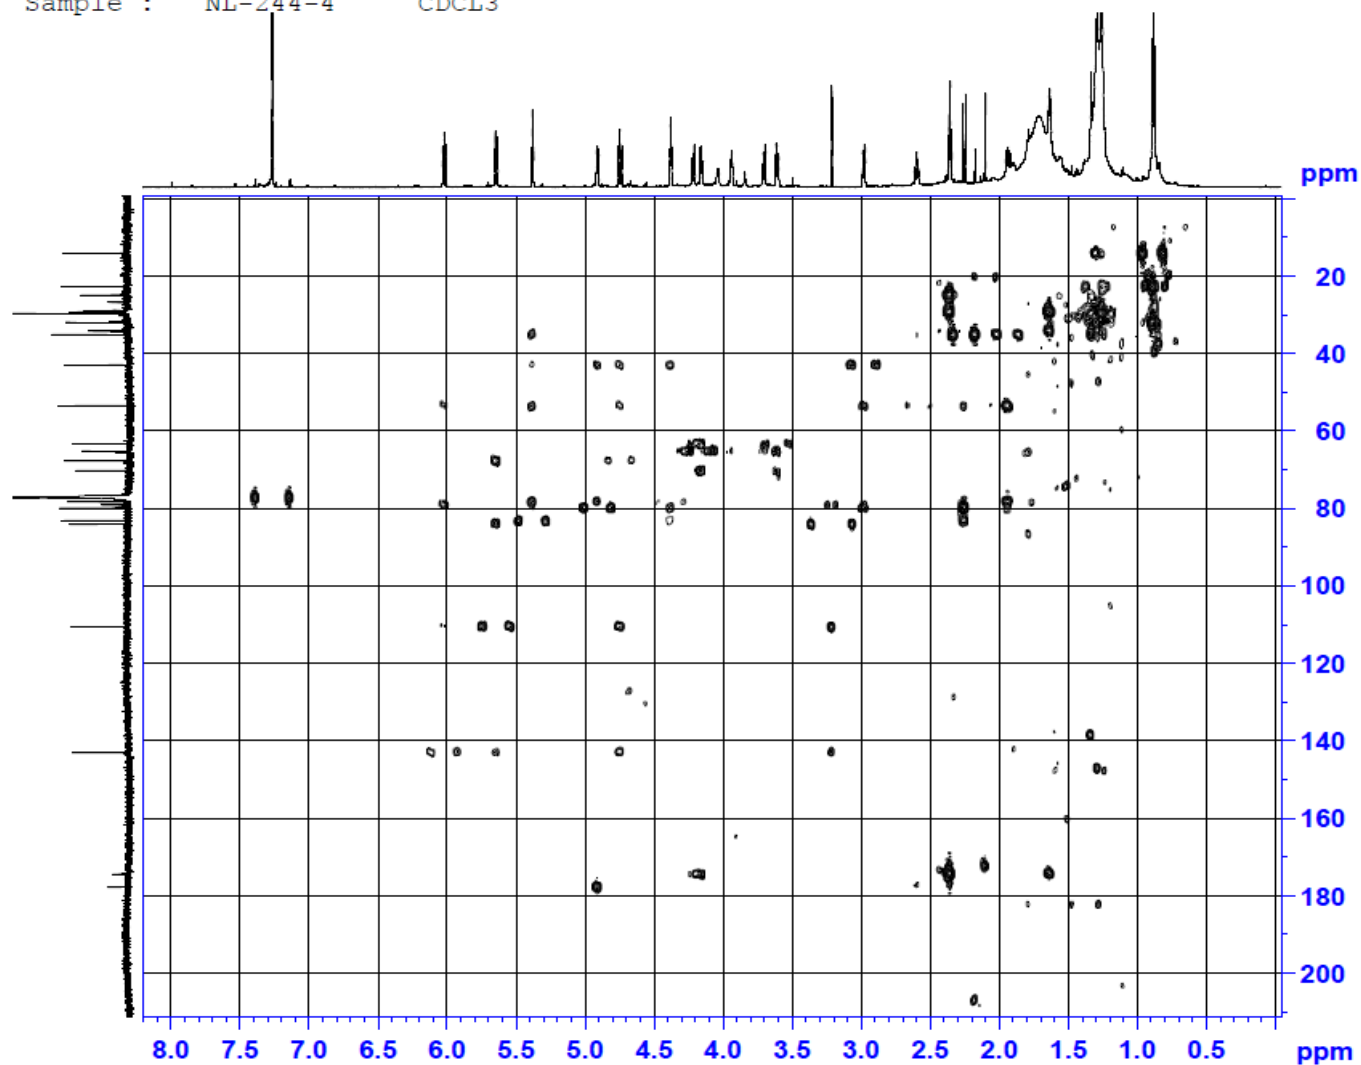

Current Data Parameters  
NAME WALIED NL-244-4 16-03-2017  
EXPNO 25  
PROCNO 1

F2 - Acquisition Parameters  
Date\_ 20170318  
Time\_ 6.48  
INSTRUM spect  
PROBHD 5 mm CPQCI 1H-  
FULPROG hmcgppndgr  
TD 4096  
SOLVENT CDCL3  
NS 128  
DS 16  
SWH 8064.516 Hz  
FIDRES 1.968876 Hz  
AQ 0.2539520 sec  
RG 186.93  
DN 62.000 usec  
DE 10.00 usec  
TE 298.0 K  
CNST13 8.0000000  
DO 0.00000300 sec  
D1 1.42709100 sec  
D5 0.06250000 sec  
D16 0.00020000 sec  
IN0 0.0001050 sec

===== CHANNEL f1 =====  
SFO1 850.1529628 MHz  
NUC1 1H  
P1 8.00 usec  
P2 16.00 usec  
PLW1 15.30000019 W

===== CHANNEL f2 =====  
SFO2 213.7917305 MHz  
NUC2 13C  
P3 12.00 usec  
PLW2 130.00000000 W

===== GRADIENT CHANNEL =====  
GPNAM[1] SMSQ10.100  
GPNAM[2] SMSQ10.100  
GPNAM[3] SMSQ10.100  
GPZ1 50.00 %  
GPZ2 30.00 %  
GPZ3 40.10 %  
P16 1000.00 usec

F1 - Acquisition parameters  
TD 128  
SFO1 213.7917 MHz  
FIDRES 372.023804 Hz  
SW 222.736 ppm  
FMODE QF

F2 - Processing parameters  
SI 1024  
SF 850.1500200 MHz  
WDW SINE  
SSB 0  
LB 0 Hz  
GB 0  
PC 1.40

F1 - Processing parameters  
SI 1024  
MC2 QF  
SF 213.7703875 MHz  
WDW SINE  
SSB 0  
LB 0 Hz  
GB 0

Figure S3o: HMBC NMR of compound 3

Dr. Walied  
Sample : NL-244-4 CDCL3

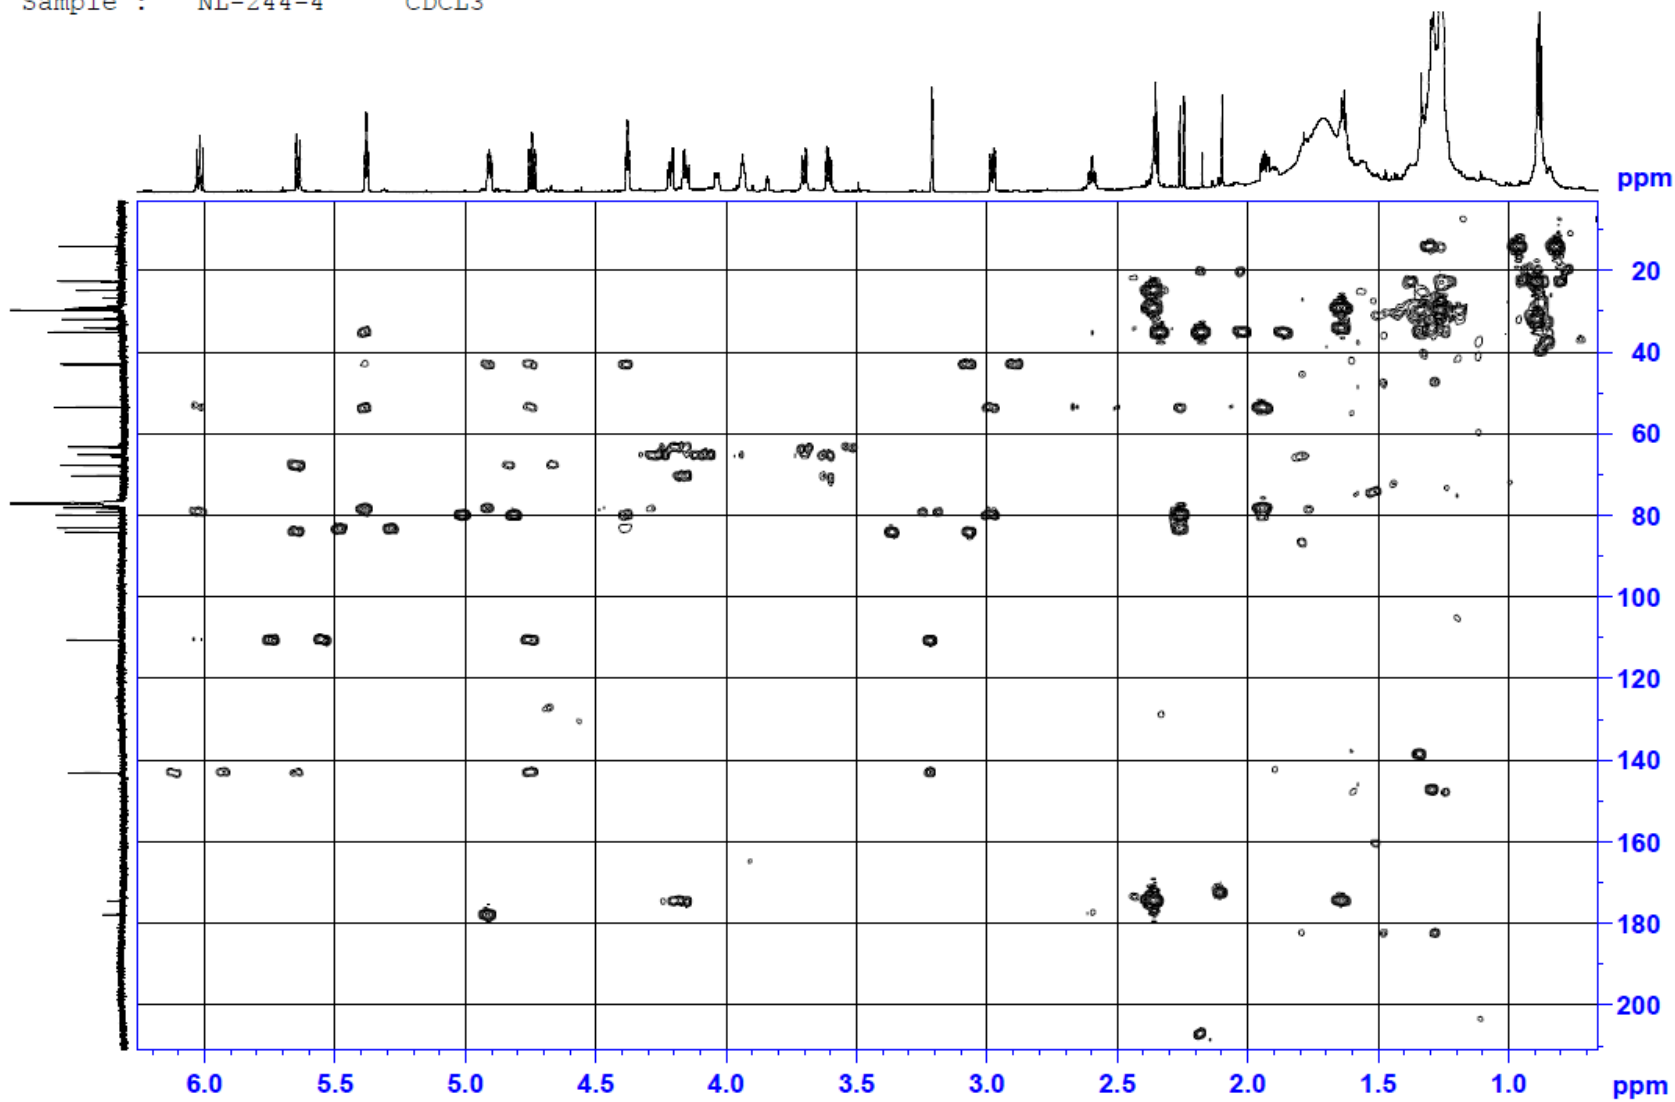

Figure S3p: HMBC NMR of compound 3

Dr.Walied  
Sample : NL-244-4 CDCL3

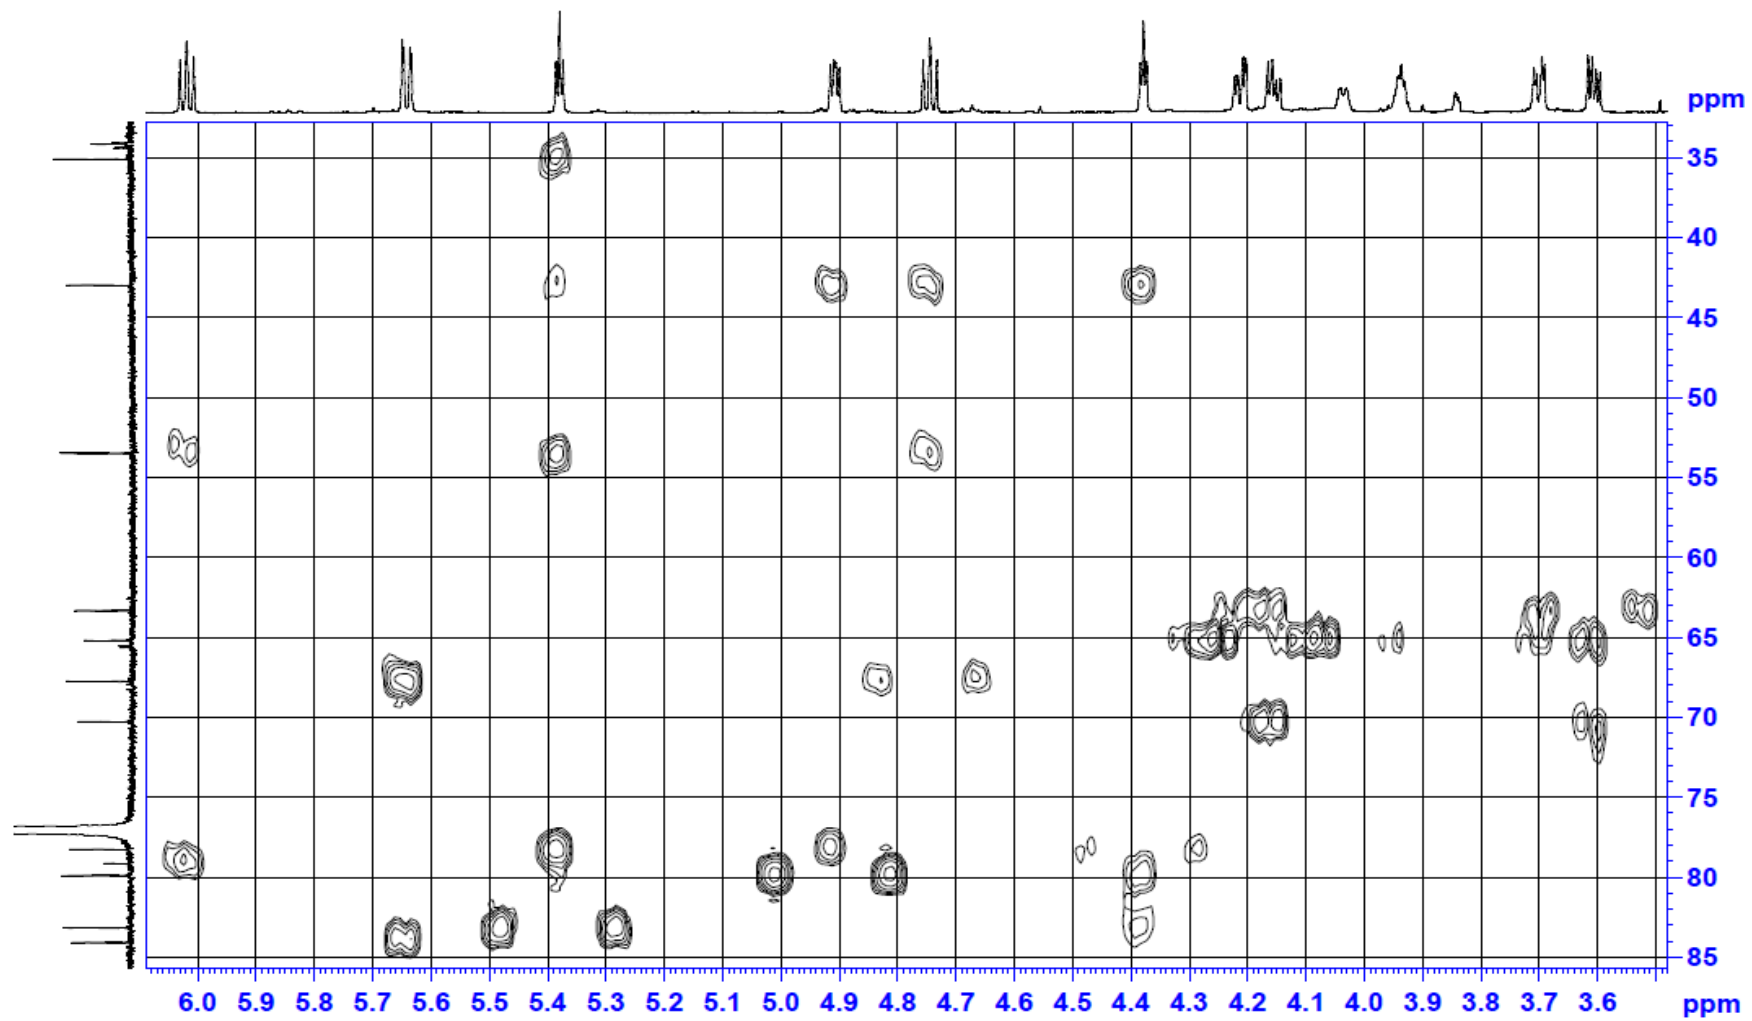

Figure S3q: HMBC NMR of compound 3

Dr. Walied  
Sample : NL-244-4 CDCL3

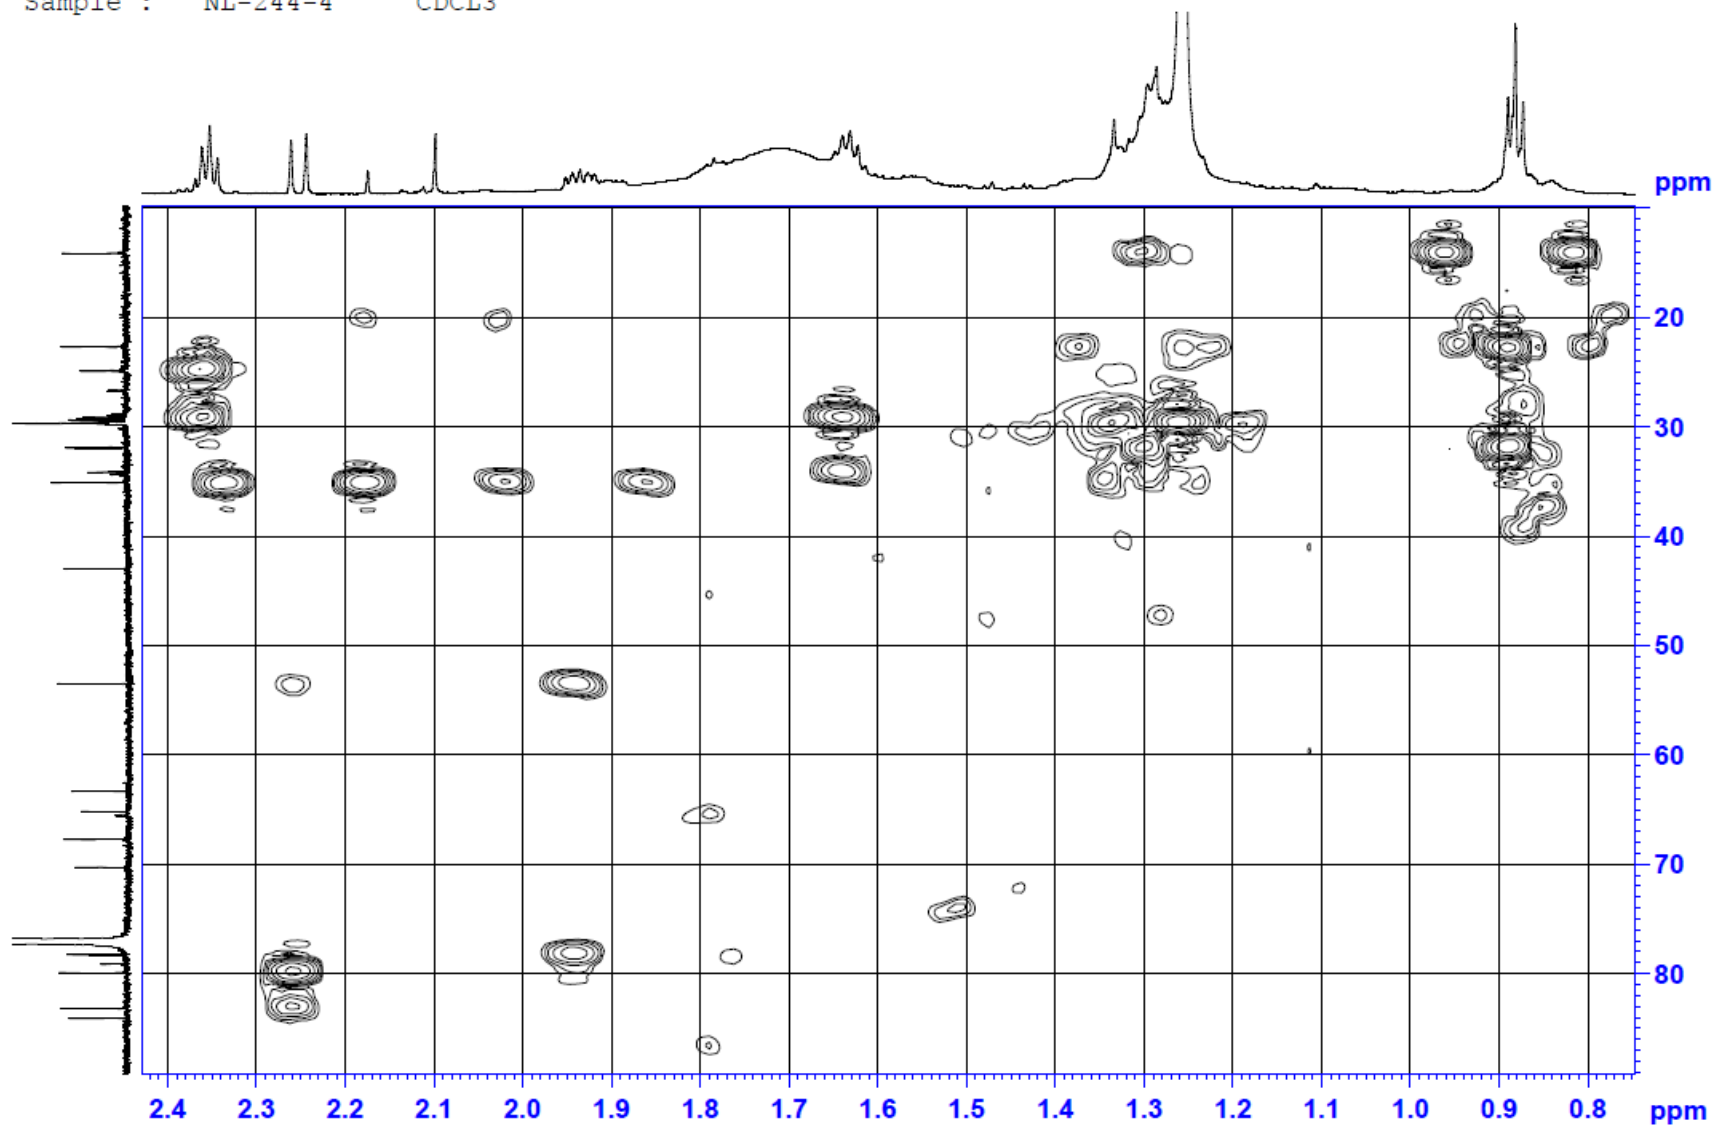

Figure S3r: HMBC NMR of compound 3

Dr.Walied

Sample : NL-244-4

CDCL3

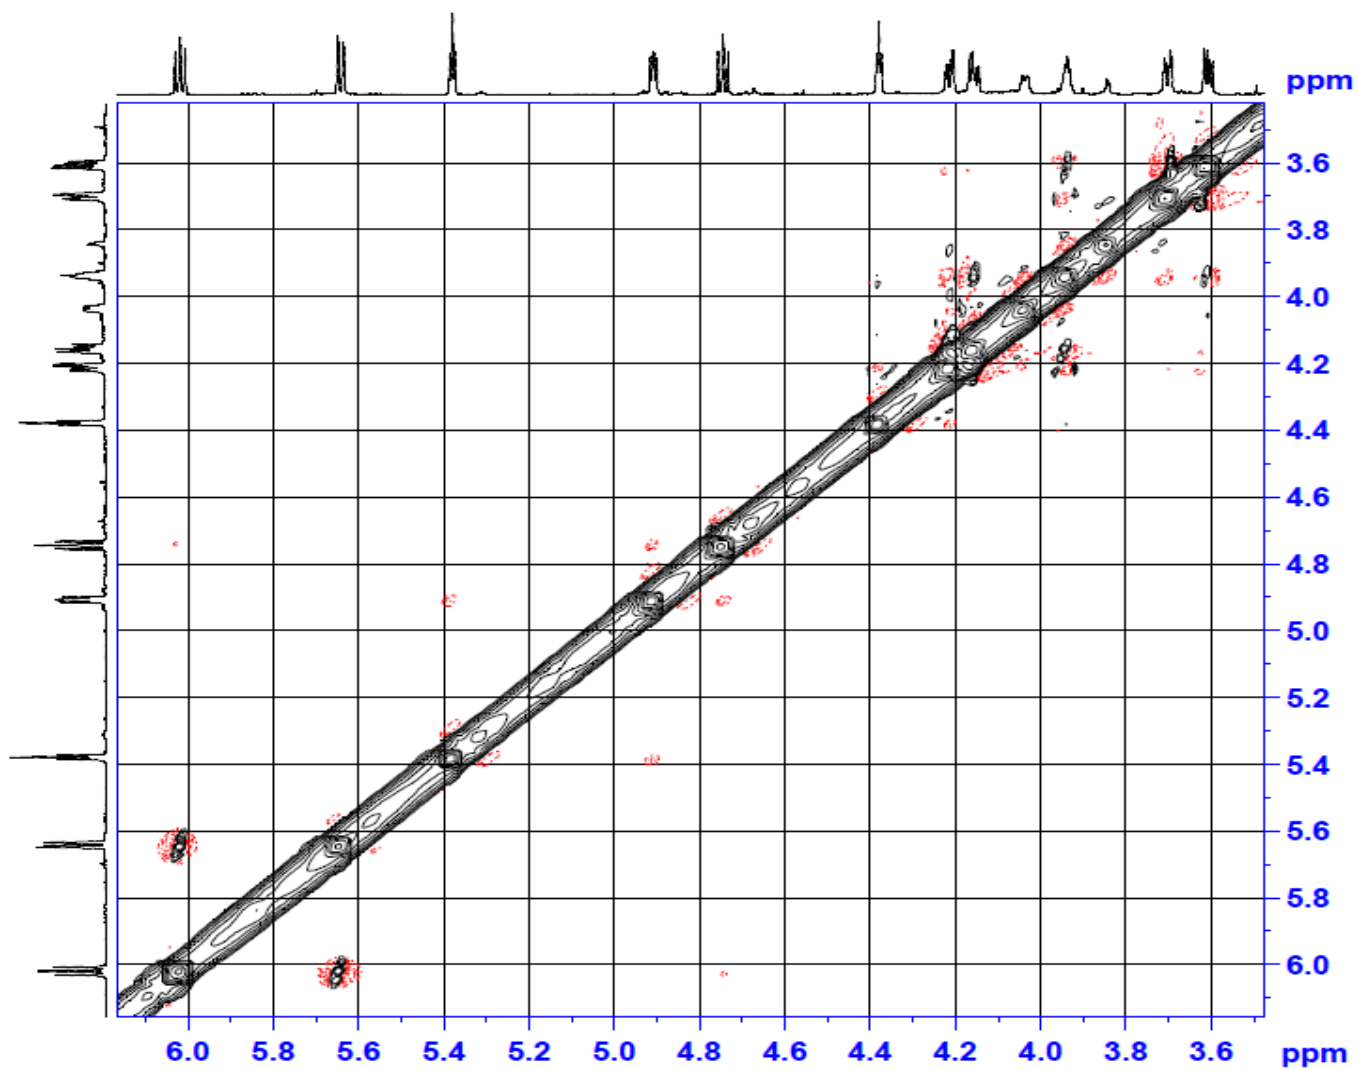

Figure S3s: NOSY NMR of compound 3

Dr.Walied  
Sample : NL-244-4 CDCL3

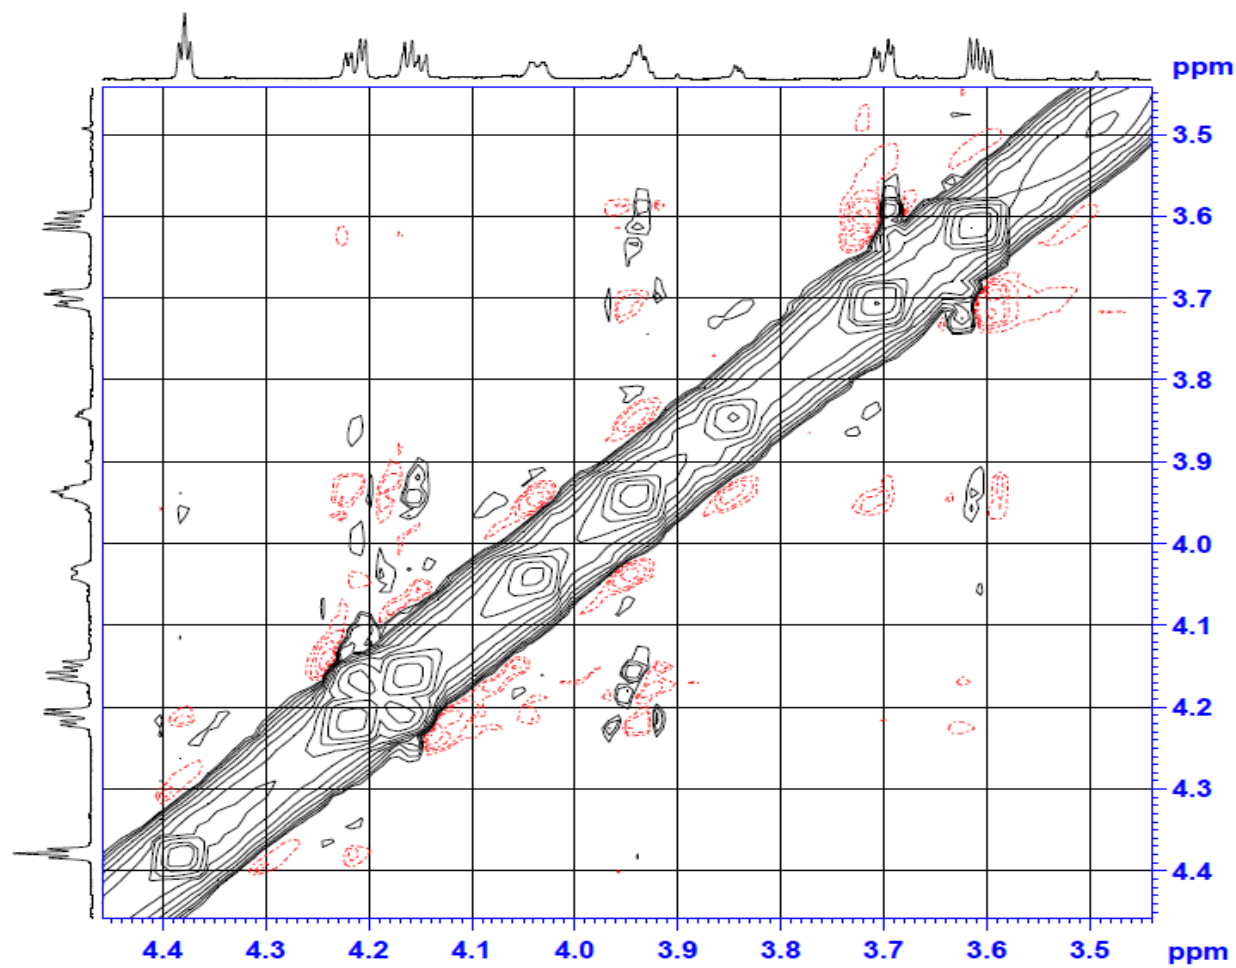

**Figure S3t: NOSY NMR of compound 3**
